# Supplementary material
Source: PubMed Central journal article supplement (PMC3561759)
Supplement: NIHMS424386-supplement-2.pdf [file NIHMS424386-supplement-2.pdf]

| chr | CNV start | CNV stop  | Gene          | Gene feature            |
|-----|-----------|-----------|---------------|-------------------------|
| 1   | 37261312  | 37269719  | Tmem131       | closest upstream gene   |
| 1   | 37261312  | 37269719  | Cnga3         | closest downstream gene |
| 1   | 41160869  | 41180390  | Tmem182       | closest upstream gene   |
| 1   | 41160869  | 41180390  | 2610017I09Rik | closest downstream gene |
| 1   | 66835123  | 66839616  | 1110028C15Rik | in region               |
| 2   | 88714200  | 88719211  | Olf1206       | closest upstream gene   |
| 2   | 88714200  | 88719211  | Olf1208       | closest downstream gene |
| 2   | 154840037 | 154846228 | a             | in region               |
| 3   | 30065831  | 30417157  | Mecom         | closest upstream gene   |
| 3   | 30065831  | 30417157  | Arpm1         | closest downstream gene |
| 3   | 35476875  | 35495913  | Sox2ot        | closest upstream gene   |
| 3   | 35476875  | 35495913  | Atp11b        | closest downstream gene |
| 3   | 39563408  | 39598697  | Fat4          | closest upstream gene   |
| 3   | 39563408  | 39598697  | Intu          | closest downstream gene |
| 3   | 94246481  | 94410611  | Celf3         | in region               |
| 3   | 94246481  | 94410611  | Mrpl9         | in region               |
| 3   | 94246481  | 94410611  | Riad1         | in region               |
| 3   | 94246481  | 94410611  | Snx27         | in region               |
| 3   | 104311901 | 104319916 | Lrig2         | in region               |
| 3   | 144613709 | 144619149 | Clca6         | in region               |
| 3   | 144613709 | 144619149 | Clca6         | in region               |
| 4   | 108673    | 137301    | Vmn1r2        | closest downstream gene |
| 4   | 3353037   | 5882883   | 6330407A03Rik | in region               |
| 4   | 3353037   | 5882883   | Chchd7        | in region               |
| 4   | 3353037   | 5882883   | Fam110b       | in region               |
| 4   | 3353037   | 5882883   | Impad1        | in region               |
| 4   | 3353037   | 5882883   | Lyn           | in region               |
| 4   | 3353037   | 5882883   | Mos           | in region               |
| 4   | 3353037   | 5882883   | Penk          | in region               |
| 4   | 3353037   | 5882883   | Plag1         | in region               |
| 4   | 3353037   | 5882883   | Rps20         | in region               |
| 4   | 3353037   | 5882883   | Sdr16c5       | in region               |
| 4   | 3353037   | 5882883   | Sdr16c6       | in region               |
| 4   | 3353037   | 5882883   | Tgs1          | in region               |
| 4   | 3353037   | 5882883   | Tmem68        | in region               |
| 4   | 5919294   | 6304249   | Cyp7a1        | in region               |
| 4   | 5919294   | 6304249   | Sdcbp         | in region               |
| 4   | 5919294   | 6304249   | Ubxn2b        | in region               |
| 4   | 6323722   | 9768420   | 4930412C18Rik | in region               |
| 4   | 6323722   | 9768420   | Asph          | in region               |
| 4   | 6323722   | 9768420   | Car8          | in region               |
| 4   | 6323722   | 9768420   | Chd7          | in region               |
| 4   | 6323722   | 9768420   | Clvs1         | in region               |
| 4   | 6323722   | 9768420   | Nsmaf         | in region               |
| 4   | 6323722   | 9768420   | Rab2a         | in region               |
| 4   | 6323722   | 9768420   | Tox           | in region               |
| 4   | 8149783   | 8156635   | Car8          | in region               |
| 4   | 10669395  | 10684312  | 4930448K20Rik | closest upstream gene   |
| 4   | 10669395  | 10684312  | 2610301B20Rik | closest downstream gene |

|   |           |                        |                         |
|---|-----------|------------------------|-------------------------|
| 4 | 16046223  | 16050237 Osgin2        | closest upstream gene   |
| 4 | 16046223  | 16050237 Ripk2         | closest downstream gene |
| 4 | 17804251  | 17819463 Mmp16         | in region               |
| 4 | 25232469  | 25266783 1810074P20Rik | closest upstream gene   |
| 4 | 25232469  | 25266783 Fut9          | closest downstream gene |
| 4 | 26735929  | 31706301 Epha7         | in region               |
| 4 | 48245140  | 54717839 2810432L12Rik | in region               |
| 4 | 48245140  | 54717839 4930547C10Rik | in region               |
| 4 | 48245140  | 54717839 5730528L13Rik | in region               |
| 4 | 48245140  | 54717839 AI427809      | in region               |
| 4 | 48245140  | 54717839 Abca1         | in region               |
| 4 | 48245140  | 54717839 Acnat1        | in region               |
| 4 | 48245140  | 54717839 Acnat2        | in region               |
| 4 | 48245140  | 54717839 Aldob         | in region               |
| 4 | 48245140  | 54717839 Baat          | in region               |
| 4 | 48245140  | 54717839 Cylc2         | in region               |
| 4 | 48245140  | 54717839 E130309F12Rik | in region               |
| 4 | 48245140  | 54717839 Erp44         | in region               |
| 4 | 48245140  | 54717839 Fktn          | in region               |
| 4 | 48245140  | 54717839 Fsd1l         | in region               |
| 4 | 48245140  | 54717839 Grin3a        | in region               |
| 4 | 48245140  | 54717839 Invs          | in region               |
| 4 | 48245140  | 54717839 Mrpl50        | in region               |
| 4 | 48245140  | 54717839 Murc          | in region               |
| 4 | 48245140  | 54717839 Nipsnap3a     | in region               |
| 4 | 48245140  | 54717839 Nipsnap3b     | in region               |
| 4 | 48245140  | 54717839 Olfr270       | in region               |
| 4 | 48245140  | 54717839 Olfr272       | in region               |
| 4 | 48245140  | 54717839 Olfr273       | in region               |
| 4 | 48245140  | 54717839 Olfr275       | in region               |
| 4 | 48245140  | 54717839 Ppp3r2        | in region               |
| 4 | 48245140  | 54717839 Rnf20         | in region               |
| 4 | 48245140  | 54717839 Slc44a1       | in region               |
| 4 | 48245140  | 54717839 Smc2          | in region               |
| 4 | 48245140  | 54717839 Tal2          | in region               |
| 4 | 48245140  | 54717839 Tex10         | in region               |
| 4 | 48245140  | 54717839 Tmeff1        | in region               |
| 4 | 48245140  | 54717839 Tmem38b       | in region               |
| 4 | 48245140  | 54717839 Zfp189        | in region               |
| 4 | 89376248  | 89450792 Dmrta1        | closest upstream gene   |
| 4 | 89376248  | 89450792 Zfp352        | closest downstream gene |
| 4 | 98825082  | 98831985 Dock7         | closest upstream gene   |
| 4 | 98825082  | 98831985 Atg4c         | closest downstream gene |
| 4 | 100470985 | 100479762 Cachd1       | in region               |
| 4 | 111109230 | 111113731 Agbl4        | in region               |
| 4 | 111109230 | 111113731 Bend5        | in region               |
| 4 | 111745389 | 111754246 Skint4       | in region               |
| 4 | 112362843 | 112375515 Skint2       | closest upstream gene   |
| 4 | 112362843 | 112375515 Skint10      | closest downstream gene |
| 4 | 112922412 | 112936900 Skint6       | in region               |
| 4 | 113284761 | 113309482 Skint5       | in region               |
| 4 | 113911554 | 114161959 Gm12824      | in region               |

|   |           |                         |           |
|---|-----------|-------------------------|-----------|
| 4 | 113911554 | 114161959 Skint11       | in region |
| 4 | 114600149 | 125030202 1110065P20Rik | in region |
| 4 | 114600149 | 125030202 1520402A15Rik | in region |
| 4 | 114600149 | 125030202 1700042G07Rik | in region |
| 4 | 114600149 | 125030202 2610528J11Rik | in region |
| 4 | 114600149 | 125030202 4732418C07Rik | in region |
| 4 | 114600149 | 125030202 4930538K18Rik | in region |
| 4 | 114600149 | 125030202 4930544O15Rik | in region |
| 4 | 114600149 | 125030202 9530002B09Rik | in region |
| 4 | 114600149 | 125030202 9930104L06Rik | in region |
| 4 | 114600149 | 125030202 AA415398      | in region |
| 4 | 114600149 | 125030202 AU022252      | in region |
| 4 | 114600149 | 125030202 Akirin1       | in region |
| 4 | 114600149 | 125030202 Akr1a4        | in region |
| 4 | 114600149 | 125030202 Artn          | in region |
| 4 | 114600149 | 125030202 Atp6v0b       | in region |
| 4 | 114600149 | 125030202 Atpaf1        | in region |
| 4 | 114600149 | 125030202 B4galt2       | in region |
| 4 | 114600149 | 125030202 BC002163      | in region |
| 4 | 114600149 | 125030202 Bmp8a         | in region |
| 4 | 114600149 | 125030202 Bmp8b         | in region |
| 4 | 114600149 | 125030202 Btbd19        | in region |
| 4 | 114600149 | 125030202 C530005A16Rik | in region |
| 4 | 114600149 | 125030202 Cap1          | in region |
| 4 | 114600149 | 125030202 Ccdc163       | in region |
| 4 | 114600149 | 125030202 Ccdc17        | in region |
| 4 | 114600149 | 125030202 Ccdc23        | in region |
| 4 | 114600149 | 125030202 Ccdc24        | in region |
| 4 | 114600149 | 125030202 Ccdc30        | in region |
| 4 | 114600149 | 125030202 Cdc20         | in region |
| 4 | 114600149 | 125030202 Cdca8         | in region |
| 4 | 114600149 | 125030202 Cited4        | in region |
| 4 | 114600149 | 125030202 Cldn19        | in region |
| 4 | 114600149 | 125030202 Cmpk1         | in region |
| 4 | 114600149 | 125030202 Col9a2        | in region |
| 4 | 114600149 | 125030202 Ctps          | in region |
| 4 | 114600149 | 125030202 Cyp4a10       | in region |
| 4 | 114600149 | 125030202 Cyp4a12a      | in region |
| 4 | 114600149 | 125030202 Cyp4a12b      | in region |
| 4 | 114600149 | 125030202 Cyp4a14       | in region |
| 4 | 114600149 | 125030202 Cyp4a29-ps    | in region |
| 4 | 114600149 | 125030202 Cyp4a30b-ps   | in region |
| 4 | 114600149 | 125030202 Cyp4a31       | in region |
| 4 | 114600149 | 125030202 Cyp4a32       | in region |
| 4 | 114600149 | 125030202 Cyp4b1        | in region |
| 4 | 114600149 | 125030202 Cyp4x1        | in region |
| 4 | 114600149 | 125030202 D4Ertd617e    | in region |
| 4 | 114600149 | 125030202 D830031N03Rik | in region |
| 4 | 114600149 | 125030202 Dem1          | in region |
| 4 | 114600149 | 125030202 Dmap1         | in region |
| 4 | 114600149 | 125030202 Dmbx1         | in region |
| 4 | 114600149 | 125030202 Dnali1        | in region |

|   |           |                    |           |
|---|-----------|--------------------|-----------|
| 4 | 114600149 | 125030202 Dph2     | in region |
| 4 | 114600149 | 125030202 Ebna1bp2 | in region |
| 4 | 114600149 | 125030202 Edn2     | in region |
| 4 | 114600149 | 125030202 Eif2b3   | in region |
| 4 | 114600149 | 125030202 Elovl1   | in region |
| 4 | 114600149 | 125030202 Epha10   | in region |
| 4 | 114600149 | 125030202 Eri3     | in region |
| 4 | 114600149 | 125030202 Ermap    | in region |
| 4 | 114600149 | 125030202 Faah     | in region |
| 4 | 114600149 | 125030202 Fhl3     | in region |
| 4 | 114600149 | 125030202 Foxj3    | in region |
| 4 | 114600149 | 125030202 Foxo6    | in region |
| 4 | 114600149 | 125030202 Gm12839  | in region |
| 4 | 114600149 | 125030202 Gm12886  | in region |
| 4 | 114600149 | 125030202 Gm12887  | in region |
| 4 | 114600149 | 125030202 Gm12888  | in region |
| 4 | 114600149 | 125030202 Gm1661   | in region |
| 4 | 114600149 | 125030202 Gm8439   | in region |
| 4 | 114600149 | 125030202 Gnl2     | in region |
| 4 | 114600149 | 125030202 Gpbp111  | in region |
| 4 | 114600149 | 125030202 Guca2a   | in region |
| 4 | 114600149 | 125030202 Guca2b   | in region |
| 4 | 114600149 | 125030202 Hectd3   | in region |
| 4 | 114600149 | 125030202 Heyl     | in region |
| 4 | 114600149 | 125030202 Hivep3   | in region |
| 4 | 114600149 | 125030202 Hpcal4   | in region |
| 4 | 114600149 | 125030202 Hpdl     | in region |
| 4 | 114600149 | 125030202 Hyi      | in region |
| 4 | 114600149 | 125030202 Inpp5b   | in region |
| 4 | 114600149 | 125030202 Ipo13    | in region |
| 4 | 114600149 | 125030202 Ipp      | in region |
| 4 | 114600149 | 125030202 Kcnq4    | in region |
| 4 | 114600149 | 125030202 Kdm4a    | in region |
| 4 | 114600149 | 125030202 Kif2c    | in region |
| 4 | 114600149 | 125030202 Klf17    | in region |
| 4 | 114600149 | 125030202 Kncn     | in region |
| 4 | 114600149 | 125030202 Lao1     | in region |
| 4 | 114600149 | 125030202 Lepre1   | in region |
| 4 | 114600149 | 125030202 Lrrc41   | in region |
| 4 | 114600149 | 125030202 Macf1    | in region |
| 4 | 114600149 | 125030202 Maneal   | in region |
| 4 | 114600149 | 125030202 Mast2    | in region |
| 4 | 114600149 | 125030202 Meaf6    | in region |
| 4 | 114600149 | 125030202 Med8     | in region |
| 4 | 114600149 | 125030202 Mfsd2a   | in region |
| 4 | 114600149 | 125030202 Mir30c-1 | in region |
| 4 | 114600149 | 125030202 Mir30e   | in region |
| 4 | 114600149 | 125030202 Mir697   | in region |
| 4 | 114600149 | 125030202 Mir698   | in region |
| 4 | 114600149 | 125030202 Mknk1    | in region |
| 4 | 114600149 | 125030202 Mmachc   | in region |
| 4 | 114600149 | 125030202 Mobkl2c  | in region |

|   |           |                    |           |
|---|-----------|--------------------|-----------|
| 4 | 114600149 | 125030202 Mpl      | in region |
| 4 | 114600149 | 125030202 Mtf1     | in region |
| 4 | 114600149 | 125030202 Mutyh    | in region |
| 4 | 114600149 | 125030202 Mycbp    | in region |
| 4 | 114600149 | 125030202 Mycl1    | in region |
| 4 | 114600149 | 125030202 Nasp     | in region |
| 4 | 114600149 | 125030202 Ndufs5   | in region |
| 4 | 114600149 | 125030202 Nfyc     | in region |
| 4 | 114600149 | 125030202 Nsun4    | in region |
| 4 | 114600149 | 125030202 Nt5c1a   | in region |
| 4 | 114600149 | 125030202 Olfr1328 | in region |
| 4 | 114600149 | 125030202 Olfr1329 | in region |
| 4 | 114600149 | 125030202 Olfr1330 | in region |
| 4 | 114600149 | 125030202 Olfr1331 | in region |
| 4 | 114600149 | 125030202 Olfr1333 | in region |
| 4 | 114600149 | 125030202 Olfr1335 | in region |
| 4 | 114600149 | 125030202 Olfr1337 | in region |
| 4 | 114600149 | 125030202 Olfr1338 | in region |
| 4 | 114600149 | 125030202 Olfr1339 | in region |
| 4 | 114600149 | 125030202 Olfr1340 | in region |
| 4 | 114600149 | 125030202 Olfr1341 | in region |
| 4 | 114600149 | 125030202 Olfr1342 | in region |
| 4 | 114600149 | 125030202 Olfr62   | in region |
| 4 | 114600149 | 125030202 Oxct2a   | in region |
| 4 | 114600149 | 125030202 Oxct2b   | in region |
| 4 | 114600149 | 125030202 Pabpc4   | in region |
| 4 | 114600149 | 125030202 Pdzk1ip1 | in region |
| 4 | 114600149 | 125030202 Pik3r3   | in region |
| 4 | 114600149 | 125030202 Plk3     | in region |
| 4 | 114600149 | 125030202 Pomgnt1  | in region |
| 4 | 114600149 | 125030202 Pou3f1   | in region |
| 4 | 114600149 | 125030202 Ppcs     | in region |
| 4 | 114600149 | 125030202 Ppie     | in region |
| 4 | 114600149 | 125030202 Ppih     | in region |
| 4 | 114600149 | 125030202 Ppt1     | in region |
| 4 | 114600149 | 125030202 Prdx1    | in region |
| 4 | 114600149 | 125030202 Ptch2    | in region |
| 4 | 114600149 | 125030202 Ptpf     | in region |
| 4 | 114600149 | 125030202 Rad54l   | in region |
| 4 | 114600149 | 125030202 Rhbdl2   | in region |
| 4 | 114600149 | 125030202 Rimkla   | in region |
| 4 | 114600149 | 125030202 Rims3    | in region |
| 4 | 114600149 | 125030202 Rlf      | in region |
| 4 | 114600149 | 125030202 Rnf220   | in region |
| 4 | 114600149 | 125030202 Rps8     | in region |
| 4 | 114600149 | 125030202 Rragc    | in region |
| 4 | 114600149 | 125030202 Rspo1    | in region |
| 4 | 114600149 | 125030202 Scmh1    | in region |
| 4 | 114600149 | 125030202 Sf3a3    | in region |
| 4 | 114600149 | 125030202 Slc2a1   | in region |
| 4 | 114600149 | 125030202 Slc6a9   | in region |
| 4 | 114600149 | 125030202 Slfnl1   | in region |

|   |           |                         |                         |
|---|-----------|-------------------------|-------------------------|
| 4 | 114600149 | 125030202 Smap2         | in region               |
| 4 | 114600149 | 125030202 Snip1         | in region               |
| 4 | 114600149 | 125030202 Snord38a      | in region               |
| 4 | 114600149 | 125030202 Snord55       | in region               |
| 4 | 114600149 | 125030202 St3gal3       | in region               |
| 4 | 114600149 | 125030202 Stil          | in region               |
| 4 | 114600149 | 125030202 Szt2          | in region               |
| 4 | 114600149 | 125030202 Tal1          | in region               |
| 4 | 114600149 | 125030202 Tctex1d4      | in region               |
| 4 | 114600149 | 125030202 Tesk2         | in region               |
| 4 | 114600149 | 125030202 Tie1          | in region               |
| 4 | 114600149 | 125030202 Tmco2         | in region               |
| 4 | 114600149 | 125030202 Tmem125       | in region               |
| 4 | 114600149 | 125030202 Tmem53        | in region               |
| 4 | 114600149 | 125030202 Tmem69        | in region               |
| 4 | 114600149 | 125030202 Toe1          | in region               |
| 4 | 114600149 | 125030202 Trit1         | in region               |
| 4 | 114600149 | 125030202 Tspan1        | in region               |
| 4 | 114600149 | 125030202 Uqcrh         | in region               |
| 4 | 114600149 | 125030202 Urod          | in region               |
| 4 | 114600149 | 125030202 Utp11l        | in region               |
| 4 | 114600149 | 125030202 Wdr65         | in region               |
| 4 | 114600149 | 125030202 Ybx1          | in region               |
| 4 | 114600149 | 125030202 Yrdc          | in region               |
| 4 | 114600149 | 125030202 Zc3h12a       | in region               |
| 4 | 114600149 | 125030202 Zfp69         | in region               |
| 4 | 114600149 | 125030202 Zfp691        | in region               |
| 4 | 114600149 | 125030202 Zmpste24      | in region               |
| 4 | 114600149 | 125030202 Zmynd12       | in region               |
| 4 | 114600149 | 125030202 Zswim5        | in region               |
| 4 | 119046121 | 119049920 Ccdc30        | in region               |
| 4 | 124478262 | 124483156 Inpp5b        | in region               |
| 4 | 124478262 | 124483156 Mtf1          | in region               |
| 4 | 128868505 | 128877071 Yars          | in region               |
| 4 | 128868505 | 128877071 Yars          | in region               |
| 4 | 135263959 | 135270848 Il28ra        | in region               |
| 4 | 135263959 | 135270848 Il28ra        | in region               |
| 4 | 135580544 | 135587308 Tceb3         | closest upstream gene   |
| 4 | 135580544 | 135587308 Rpl11         | closest downstream gene |
| 4 | 135593576 | 136274451 4930549C01Rik | in region               |
| 4 | 135593576 | 136274451 Asap3         | in region               |
| 4 | 135593576 | 136274451 E2f2          | in region               |
| 4 | 135593576 | 136274451 Ephb2         | in region               |
| 4 | 135593576 | 136274451 Hnrnpr        | in region               |
| 4 | 135593576 | 136274451 Htr1d         | in region               |
| 4 | 135593576 | 136274451 Id3           | in region               |
| 4 | 135593576 | 136274451 Kdm1a         | in region               |
| 4 | 135593576 | 136274451 Luzp1         | in region               |
| 4 | 135593576 | 136274451 Rpl11         | in region               |
| 4 | 135593576 | 136274451 Tcea3         | in region               |
| 4 | 135593576 | 136274451 Zfp46         | in region               |
| 4 | 137028177 | 137033877 Hspg2         | in region               |

|   |           |                         |                         |
|---|-----------|-------------------------|-------------------------|
| 4 | 138332045 | 138342152 Pla2g2d       | in region               |
| 4 | 140346748 | 140369614 Padi1         | in region               |
| 4 | 140346748 | 140369614 Padi3         | in region               |
| 4 | 140346748 | 140369614 Padi1         | in region               |
| 4 | 140346748 | 140369614 Padi3         | in region               |
| 4 | 140615336 | 140622510 Necap2        | in region               |
| 4 | 140615336 | 140622510 Necap2        | in region               |
| 4 | 140833124 | 140868192 Epha2         | in region               |
| 4 | 144041747 | 144041935 1700012P22Rik | closest upstream gene   |
| 4 | 144041747 | 144041935 Aadacl3       | closest downstream gene |
| 4 | 144472718 | 145004485 Dhrc3         | in region               |
| 4 | 144472718 | 145004485 Tnfrsf1b      | in region               |
| 4 | 144472718 | 145004485 Tnfrsf8       | in region               |
| 4 | 144472718 | 145004485 Vps13d        | in region               |
| 4 | 147256753 | 147527356 2510039O18Rik | in region               |
| 4 | 147256753 | 147527356 2610109H07Rik | in region               |
| 4 | 147256753 | 147527356 Agtrap        | in region               |
| 4 | 147256753 | 147527356 Clcn6         | in region               |
| 4 | 147256753 | 147527356 Fbxo44        | in region               |
| 4 | 147256753 | 147527356 Fbxo6         | in region               |
| 4 | 147256753 | 147527356 Mad2l2        | in region               |
| 4 | 147256753 | 147527356 Mfn2          | in region               |
| 4 | 147256753 | 147527356 Mthfr         | in region               |
| 4 | 147256753 | 147527356 Nppa          | in region               |
| 4 | 147256753 | 147527356 Nppb          | in region               |
| 4 | 147256753 | 147527356 Plod1         | in region               |
| 4 | 147873450 | 147881261 Angptl7       | in region               |
| 4 | 147873450 | 147881261 Mtor          | in region               |
| 4 | 153667346 | 153673400 Arhgef16      | in region               |
| 4 | 154247833 | 154251287 Mmel1         | in region               |
| 5 | 65412893  | 65562892 Fam114a1       | in region               |
| 5 | 65412893  | 65562892 Klhl5          | in region               |
| 5 | 65412893  | 65562892 Fam114a1       | in region               |
| 5 | 65412893  | 65562892 Klhl5          | in region               |
| 5 | 105311425 | 105348300 Zfp951        | closest upstream gene   |
| 5 | 105311425 | 105348300 Abcg3         | closest downstream gene |
| 5 | 105331983 | 105348300 Zfp951        | closest upstream gene   |
| 5 | 105331983 | 105348300 Abcg3         | closest downstream gene |
| 6 | 48461795  | 48476891 Zfp862         | in region               |
| 6 | 148630679 | 148675047 Tmtc1         | closest upstream gene   |
| 6 | 148630679 | 148675047 lpo8          | closest downstream gene |
| 6 | 148861925 | 149511955 2810474O19Rik | in region               |
| 6 | 148861925 | 149511955 4833442J19Rik | in region               |
| 6 | 148861925 | 149511955 Amn1          | in region               |
| 6 | 148861925 | 149511955 Bicd1         | in region               |
| 6 | 148861925 | 149511955 Dennd5b       | in region               |
| 6 | 148861925 | 149511955 Fam60a        | in region               |
| 7 | 96230274  | 99103010 Ccdc81         | in region               |
| 7 | 96230274  | 99103010 Ccdc83         | in region               |
| 7 | 96230274  | 99103010 Ccdc89         | in region               |
| 7 | 96230274  | 99103010 Crebzf         | in region               |
| 7 | 96230274  | 99103010 Dlg2           | in region               |

|    |           |                         |                         |
|----|-----------|-------------------------|-------------------------|
| 7  | 96230274  | 99103010 E230029C05Rik  | in region               |
| 7  | 96230274  | 99103010 Eed            | in region               |
| 7  | 96230274  | 99103010 Fzd4           | in region               |
| 7  | 96230274  | 99103010 Me3            | in region               |
| 7  | 96230274  | 99103010 Picalm         | in region               |
| 7  | 96230274  | 99103010 Prss23         | in region               |
| 7  | 96230274  | 99103010 Sytl2          | in region               |
| 7  | 96230274  | 99103010 Tmem126a       | in region               |
| 7  | 96230274  | 99103010 Tmem126b       | in region               |
| 7  | 96230274  | 99103010 Tmem135        | in region               |
| 7  | 96230274  | 99103010 I7Rn6          | in region               |
| 8  | 77156369  | 77355872 Large          | closest upstream gene   |
| 8  | 77156369  | 77355872 Isx            | closest downstream gene |
| 8  | 83268773  | 83274765 Smarca5        | closest upstream gene   |
| 8  | 83268773  | 83274765 Gab1           | closest downstream gene |
| 8  | 123077454 | 123085062 Gse1          | in region               |
| 9  | 16919103  | 16977580 Fat3           | closest upstream gene   |
| 9  | 16919103  | 16977580 Chordc1        | closest downstream gene |
| 9  | 34565872  | 34577261 Kirrel3        | in region               |
| 9  | 38832189  | 38835808 Olfr146        | closest upstream gene   |
| 9  | 38832189  | 38835808 Olfr936        | closest downstream gene |
| 9  | 60328309  | 60337709 Thsd4          | closest upstream gene   |
| 9  | 60328309  | 60337709 Lrrc49         | closest downstream gene |
| 9  | 64087297  | 64090552 Map2k1         | in region               |
| 9  | 64683128  | 64690547 Dennd4a        | in region               |
| 9  | 72280048  | 72287075 Mns1           | in region               |
| 9  | 81124857  | 81142892 Impg1          | closest upstream gene   |
| 9  | 81124857  | 81142892 Htr1b          | closest downstream gene |
| 9  | 88627783  | 88628965 Bcl2a1d        | closest upstream gene   |
| 9  | 88627783  | 88628965 Trim43c        | closest downstream gene |
| 9  | 93446953  | 93476896 Plod2          | closest upstream gene   |
| 9  | 93446953  | 93476896 1190002N15Rik  | closest downstream gene |
| 9  | 94680524  | 94695397 Slc9a9         | in region               |
| 9  | 102186146 | 102203687 Ephb1         | in region               |
| 9  | 103440253 | 103453201 Tmem108       | in region               |
| 9  | 109422051 | 109429269 Fbxw19        | closest upstream gene   |
| 9  | 109422051 | 109429269 Fbxw15        | closest downstream gene |
| 9  | 116875427 | 116885369 Rbms3         | in region               |
| 9  | 119074980 | 119078554 Acaa1b        | closest upstream gene   |
| 9  | 119074980 | 119078554 Slc22a14      | closest downstream gene |
| 9  | 122955960 | 122960501 Tgm4          | in region               |
| 10 | 21399999  | 21413701 1700020N01Rik  | closest upstream gene   |
| 10 | 21399999  | 21413701 Sgk1           | closest downstream gene |
| 10 | 21643883  | 21672123 1700020N01Rik  | closest upstream gene   |
| 10 | 21643883  | 21672123 Sgk1           | closest downstream gene |
| 10 | 24890292  | 116235331 1110038D17Rik | in region               |
| 10 | 24890292  | 116235331 1190007I07Rik | in region               |
| 10 | 24890292  | 116235331 1500009L16Rik | in region               |
| 10 | 24890292  | 116235331 1600002K03Rik | in region               |
| 10 | 24890292  | 116235331 1700009J07Rik | in region               |
| 10 | 24890292  | 116235331 1700017N19Rik | in region               |
| 10 | 24890292  | 116235331 1700021F05Rik | in region               |



|    |          |           |               |           |
|----|----------|-----------|---------------|-----------|
| 10 | 24890292 | 116235331 | 1700023F02Rik | in region |
| 10 | 24890292 | 116235331 | 1700025K23Rik | in region |
| 10 | 24890292 | 116235331 | 1700027D21Rik | in region |
| 10 | 24890292 | 116235331 | 1700028I16Rik | in region |
| 10 | 24890292 | 116235331 | 1700040L02Rik | in region |
| 10 | 24890292 | 116235331 | 1700049L16Rik | in region |
| 10 | 24890292 | 116235331 | 1700058G18Rik | in region |
| 10 | 24890292 | 116235331 | 1700113H08Rik | in region |
| 10 | 24890292 | 116235331 | 1810008A18Rik | in region |
| 10 | 24890292 | 116235331 | 1810014B01Rik | in region |
| 10 | 24890292 | 116235331 | 1810043G02Rik | in region |
| 10 | 24890292 | 116235331 | 2010001E11Rik | in region |
| 10 | 24890292 | 116235331 | 2010003K15Rik | in region |
| 10 | 24890292 | 116235331 | 2010107G23Rik | in region |
| 10 | 24890292 | 116235331 | 2210404O07Rik | in region |
| 10 | 24890292 | 116235331 | 2210417K05Rik | in region |
| 10 | 24890292 | 116235331 | 2310011J03Rik | in region |
| 10 | 24890292 | 116235331 | 2310015B20Rik | in region |
| 10 | 24890292 | 116235331 | 2310050B05Rik | in region |
| 10 | 24890292 | 116235331 | 2310057J18Rik | in region |
| 10 | 24890292 | 116235331 | 2510003E04Rik | in region |
| 10 | 24890292 | 116235331 | 2510012J08Rik | in region |
| 10 | 24890292 | 116235331 | 2610008E11Rik | in region |
| 10 | 24890292 | 116235331 | 2610028H24Rik | in region |
| 10 | 24890292 | 116235331 | 3110056O03Rik | in region |
| 10 | 24890292 | 116235331 | 4632428N05Rik | in region |
| 10 | 24890292 | 116235331 | 4921510H08Rik | in region |
| 10 | 24890292 | 116235331 | 4930404N11Rik | in region |
| 10 | 24890292 | 116235331 | 4930430F08Rik | in region |
| 10 | 24890292 | 116235331 | 4930486F22Rik | in region |
| 10 | 24890292 | 116235331 | 4930507D05Rik | in region |
| 10 | 24890292 | 116235331 | 4930519F09Rik | in region |
| 10 | 24890292 | 116235331 | 4930547N16Rik | in region |
| 10 | 24890292 | 116235331 | 4932415G12Rik | in region |
| 10 | 24890292 | 116235331 | 4933403O03Rik | in region |
| 10 | 24890292 | 116235331 | 4933416C03Rik | in region |
| 10 | 24890292 | 116235331 | 6330407J23Rik | in region |
| 10 | 24890292 | 116235331 | 9030224M15Rik | in region |
| 10 | 24890292 | 116235331 | 9030612E09Rik | in region |
| 10 | 24890292 | 116235331 | 9130017N09Rik | in region |
| 10 | 24890292 | 116235331 | 9230102K24Rik | in region |
| 10 | 24890292 | 116235331 | 9330159F19Rik | in region |
| 10 | 24890292 | 116235331 | 9330159K06    | in region |
| 10 | 24890292 | 116235331 | A230046K03Rik | in region |
| 10 | 24890292 | 116235331 | A830082N09Rik | in region |
| 10 | 24890292 | 116235331 | AA474331      | in region |
| 10 | 24890292 | 116235331 | AI317395      | in region |
| 10 | 24890292 | 116235331 | AI597468      | in region |
| 10 | 24890292 | 116235331 | AI646023      | in region |
| 10 | 24890292 | 116235331 | AU041133      | in region |
| 10 | 24890292 | 116235331 | Abca7         | in region |
| 10 | 24890292 | 116235331 | Acss3         | in region |

|    |          |                    |           |
|----|----------|--------------------|-----------|
| 10 | 24890292 | 116235331 Actr6    | in region |
| 10 | 24890292 | 116235331 Adamts14 | in region |
| 10 | 24890292 | 116235331 Adamts15 | in region |
| 10 | 24890292 | 116235331 Adarb1   | in region |
| 10 | 24890292 | 116235331 Adat3    | in region |
| 10 | 24890292 | 116235331 Ado      | in region |
| 10 | 24890292 | 116235331 Adora2a  | in region |
| 10 | 24890292 | 116235331 Aes      | in region |
| 10 | 24890292 | 116235331 Agpat3   | in region |
| 10 | 24890292 | 116235331 Aifm2    | in region |
| 10 | 24890292 | 116235331 Aim1     | in region |
| 10 | 24890292 | 116235331 Aire     | in region |
| 10 | 24890292 | 116235331 Akap7    | in region |
| 10 | 24890292 | 116235331 Aldh1l2  | in region |
| 10 | 24890292 | 116235331 Alx1     | in region |
| 10 | 24890292 | 116235331 Amd1     | in region |
| 10 | 24890292 | 116235331 Amd2     | in region |
| 10 | 24890292 | 116235331 Amdhd1   | in region |
| 10 | 24890292 | 116235331 Amh      | in region |
| 10 | 24890292 | 116235331 Anapc16  | in region |
| 10 | 24890292 | 116235331 Ank3     | in region |
| 10 | 24890292 | 116235331 Ankrd24  | in region |
| 10 | 24890292 | 116235331 Ankrd57  | in region |
| 10 | 24890292 | 116235331 Anks1b   | in region |
| 10 | 24890292 | 116235331 Ano4     | in region |
| 10 | 24890292 | 116235331 Ap3d1    | in region |
| 10 | 24890292 | 116235331 Apaf1    | in region |
| 10 | 24890292 | 116235331 Apba3    | in region |
| 10 | 24890292 | 116235331 Apc2     | in region |
| 10 | 24890292 | 116235331 Appl2    | in region |
| 10 | 24890292 | 116235331 Arhgap18 | in region |
| 10 | 24890292 | 116235331 Arid3a   | in region |
| 10 | 24890292 | 116235331 Arid5b   | in region |
| 10 | 24890292 | 116235331 Arl1     | in region |
| 10 | 24890292 | 116235331 Armc2    | in region |
| 10 | 24890292 | 116235331 Ascc1    | in region |
| 10 | 24890292 | 116235331 Ascc3    | in region |
| 10 | 24890292 | 116235331 Ascl1    | in region |
| 10 | 24890292 | 116235331 Ascl4    | in region |
| 10 | 24890292 | 116235331 Asf1a    | in region |
| 10 | 24890292 | 116235331 Atcay    | in region |
| 10 | 24890292 | 116235331 Atg5     | in region |
| 10 | 24890292 | 116235331 Atoh7    | in region |
| 10 | 24890292 | 116235331 Atp2b1   | in region |
| 10 | 24890292 | 116235331 Atp5d    | in region |
| 10 | 24890292 | 116235331 Atp8b3   | in region |
| 10 | 24890292 | 116235331 Atxn7l3b | in region |
| 10 | 24890292 | 116235331 BB019430 | in region |
| 10 | 24890292 | 116235331 BC005764 | in region |
| 10 | 24890292 | 116235331 BC021785 | in region |
| 10 | 24890292 | 116235331 BC025920 | in region |
| 10 | 24890292 | 116235331 BC030307 | in region |

|    |          |                         |           |
|----|----------|-------------------------|-----------|
| 10 | 24890292 | 116235331 BC067068      | in region |
| 10 | 24890292 | 116235331 Bbs10         | in region |
| 10 | 24890292 | 116235331 Bcr           | in region |
| 10 | 24890292 | 116235331 Bend3         | in region |
| 10 | 24890292 | 116235331 Bet3l         | in region |
| 10 | 24890292 | 116235331 Bicc1         | in region |
| 10 | 24890292 | 116235331 Bpil2         | in region |
| 10 | 24890292 | 116235331 Bsg           | in region |
| 10 | 24890292 | 116235331 Btbd11        | in region |
| 10 | 24890292 | 116235331 Btbd2         | in region |
| 10 | 24890292 | 116235331 Btg1          | in region |
| 10 | 24890292 | 116235331 Bves          | in region |
| 10 | 24890292 | 116235331 C030046I01Rik | in region |
| 10 | 24890292 | 116235331 C2cd4c        | in region |
| 10 | 24890292 | 116235331 C730027H18Rik | in region |
| 10 | 24890292 | 116235331 Cabin1        | in region |
| 10 | 24890292 | 116235331 Caps2         | in region |
| 10 | 24890292 | 116235331 Casp14        | in region |
| 10 | 24890292 | 116235331 Cbara1        | in region |
| 10 | 24890292 | 116235331 Ccar1         | in region |
| 10 | 24890292 | 116235331 Ccdc105       | in region |
| 10 | 24890292 | 116235331 Ccdc109a      | in region |
| 10 | 24890292 | 116235331 Ccdc138       | in region |
| 10 | 24890292 | 116235331 Ccdc162       | in region |
| 10 | 24890292 | 116235331 Ccdc38        | in region |
| 10 | 24890292 | 116235331 Ccdc41        | in region |
| 10 | 24890292 | 116235331 Ccdc53        | in region |
| 10 | 24890292 | 116235331 Ccdc59        | in region |
| 10 | 24890292 | 116235331 Ccdc6         | in region |
| 10 | 24890292 | 116235331 Cd164         | in region |
| 10 | 24890292 | 116235331 Cd24a         | in region |
| 10 | 24890292 | 116235331 Cdc34         | in region |
| 10 | 24890292 | 116235331 Cdc40         | in region |
| 10 | 24890292 | 116235331 Cdh23         | in region |
| 10 | 24890292 | 116235331 Cdk1          | in region |
| 10 | 24890292 | 116235331 Cdk17         | in region |
| 10 | 24890292 | 116235331 Cdk19         | in region |
| 10 | 24890292 | 116235331 Celf5         | in region |
| 10 | 24890292 | 116235331 Cenpw         | in region |
| 10 | 24890292 | 116235331 Cep290        | in region |
| 10 | 24890292 | 116235331 Cep5711       | in region |
| 10 | 24890292 | 116235331 Cfd           | in region |
| 10 | 24890292 | 116235331 Chchd10       | in region |
| 10 | 24890292 | 116235331 Chpt1         | in region |
| 10 | 24890292 | 116235331 Chst11        | in region |
| 10 | 24890292 | 116235331 Chst3         | in region |
| 10 | 24890292 | 116235331 Cirbp         | in region |
| 10 | 24890292 | 116235331 Cisd1         | in region |
| 10 | 24890292 | 116235331 Ckap4         | in region |
| 10 | 24890292 | 116235331 Clvs2         | in region |
| 10 | 24890292 | 116235331 Cnn2          | in region |
| 10 | 24890292 | 116235331 Cnot2         | in region |

|    |          |           |               |           |
|----|----------|-----------|---------------|-----------|
| 10 | 24890292 | 116235331 | Col10a1       | in region |
| 10 | 24890292 | 116235331 | Col13a1       | in region |
| 10 | 24890292 | 116235331 | Col18a1       | in region |
| 10 | 24890292 | 116235331 | Col6a1        | in region |
| 10 | 24890292 | 116235331 | Col6a2        | in region |
| 10 | 24890292 | 116235331 | Cradd         | in region |
| 10 | 24890292 | 116235331 | Creb3l3       | in region |
| 10 | 24890292 | 116235331 | Cry1          | in region |
| 10 | 24890292 | 116235331 | Csl           | in region |
| 10 | 24890292 | 116235331 | Csnk1g2       | in region |
| 10 | 24890292 | 116235331 | Csrp2         | in region |
| 10 | 24890292 | 116235331 | Cstb          | in region |
| 10 | 24890292 | 116235331 | Ctnna3        | in region |
| 10 | 24890292 | 116235331 | D10Jhu81e     | in region |
| 10 | 24890292 | 116235331 | D10Wsu102e    | in region |
| 10 | 24890292 | 116235331 | D10Wsu52e     | in region |
| 10 | 24890292 | 116235331 | D630037F22Rik | in region |
| 10 | 24890292 | 116235331 | Dapk3         | in region |
| 10 | 24890292 | 116235331 | Dazap1        | in region |
| 10 | 24890292 | 116235331 | Dcbld1        | in region |
| 10 | 24890292 | 116235331 | Dcn           | in region |
| 10 | 24890292 | 116235331 | Ddit4         | in region |
| 10 | 24890292 | 116235331 | Ddo           | in region |
| 10 | 24890292 | 116235331 | Ddt           | in region |
| 10 | 24890292 | 116235331 | Ddx21         | in region |
| 10 | 24890292 | 116235331 | Ddx50         | in region |
| 10 | 24890292 | 116235331 | Derl3         | in region |
| 10 | 24890292 | 116235331 | Dip2a         | in region |
| 10 | 24890292 | 116235331 | Diras1        | in region |
| 10 | 24890292 | 116235331 | Dna2          | in region |
| 10 | 24890292 | 116235331 | Dnajb12       | in region |
| 10 | 24890292 | 116235331 | Dnajc12       | in region |
| 10 | 24890292 | 116235331 | Dnmt3l        | in region |
| 10 | 24890292 | 116235331 | Dohh          | in region |
| 10 | 24890292 | 116235331 | Dos           | in region |
| 10 | 24890292 | 116235331 | Dot1l         | in region |
| 10 | 24890292 | 116235331 | Dram1         | in region |
| 10 | 24890292 | 116235331 | Dse           | in region |
| 10 | 24890292 | 116235331 | Dusp6         | in region |
| 10 | 24890292 | 116235331 | Dux           | in region |
| 10 | 24890292 | 116235331 | E130307A14Rik | in region |
| 10 | 24890292 | 116235331 | E130317F20Rik | in region |
| 10 | 24890292 | 116235331 | E2f7          | in region |
| 10 | 24890292 | 116235331 | Echdc1        | in region |
| 10 | 24890292 | 116235331 | Edar          | in region |
| 10 | 24890292 | 116235331 | Eea1          | in region |
| 10 | 24890292 | 116235331 | Eef2          | in region |
| 10 | 24890292 | 116235331 | Efna2         | in region |
| 10 | 24890292 | 116235331 | Egr2          | in region |
| 10 | 24890292 | 116235331 | Eid3          | in region |
| 10 | 24890292 | 116235331 | Eif4ebp2      | in region |
| 10 | 24890292 | 116235331 | Elane         | in region |

|    |          |           |               |           |
|----|----------|-----------|---------------|-----------|
| 10 | 24890292 | 116235331 | Elk3          | in region |
| 10 | 24890292 | 116235331 | Epb4.1l2      | in region |
| 10 | 24890292 | 116235331 | Epyc          | in region |
| 10 | 24890292 | 116235331 | F630110N24Rik | in region |
| 10 | 24890292 | 116235331 | F830002L21Rik | in region |
| 10 | 24890292 | 116235331 | Fabp7         | in region |
| 10 | 24890292 | 116235331 | Fam108a       | in region |
| 10 | 24890292 | 116235331 | Fam13c        | in region |
| 10 | 24890292 | 116235331 | Fam162b       | in region |
| 10 | 24890292 | 116235331 | Fam184a       | in region |
| 10 | 24890292 | 116235331 | Fam26d        | in region |
| 10 | 24890292 | 116235331 | Fam26e        | in region |
| 10 | 24890292 | 116235331 | Fam26f        | in region |
| 10 | 24890292 | 116235331 | Fbxo7         | in region |
| 10 | 24890292 | 116235331 | Fgd6          | in region |
| 10 | 24890292 | 116235331 | Fgf22         | in region |
| 10 | 24890292 | 116235331 | Fhl4          | in region |
| 10 | 24890292 | 116235331 | Fig4          | in region |
| 10 | 24890292 | 116235331 | Foxo3         | in region |
| 10 | 24890292 | 116235331 | Frk           | in region |
| 10 | 24890292 | 116235331 | Fstl3         | in region |
| 10 | 24890292 | 116235331 | Ftcd          | in region |
| 10 | 24890292 | 116235331 | Fyn           | in region |
| 10 | 24890292 | 116235331 | Fzr1          | in region |
| 10 | 24890292 | 116235331 | G630090E17Rik | in region |
| 10 | 24890292 | 116235331 | Gadd45b       | in region |
| 10 | 24890292 | 116235331 | Galnt4        | in region |
| 10 | 24890292 | 116235331 | Gamt          | in region |
| 10 | 24890292 | 116235331 | Gas2l3        | in region |
| 10 | 24890292 | 116235331 | Gcc2          | in region |
| 10 | 24890292 | 116235331 | Ggt1          | in region |
| 10 | 24890292 | 116235331 | Ggt5          | in region |
| 10 | 24890292 | 116235331 | Gipc3         | in region |
| 10 | 24890292 | 116235331 | Gja1          | in region |
| 10 | 24890292 | 116235331 | Glipr1        | in region |
| 10 | 24890292 | 116235331 | Glipr1l1      | in region |
| 10 | 24890292 | 116235331 | Glipr1l2      | in region |
| 10 | 24890292 | 116235331 | Glt8d2        | in region |
| 10 | 24890292 | 116235331 | Gm10318       | in region |
| 10 | 24890292 | 116235331 | Gm10754       | in region |
| 10 | 24890292 | 116235331 | Gm10778       | in region |
| 10 | 24890292 | 116235331 | Gm10941       | in region |
| 10 | 24890292 | 116235331 | Gm16517       | in region |
| 10 | 24890292 | 116235331 | Gm239         | in region |
| 10 | 24890292 | 116235331 | Gm2696        | in region |
| 10 | 24890292 | 116235331 | Gm3238        | in region |
| 10 | 24890292 | 116235331 | Gm3258        | in region |
| 10 | 24890292 | 116235331 | Gm3285        | in region |
| 10 | 24890292 | 116235331 | Gm4301        | in region |
| 10 | 24890292 | 116235331 | Gm4302        | in region |
| 10 | 24890292 | 116235331 | Gm4303        | in region |
| 10 | 24890292 | 116235331 | Gm4305        | in region |

|    |          |           |        |           |
|----|----------|-----------|--------|-----------|
| 10 | 24890292 | 116235331 | Gm4307 | in region |
| 10 | 24890292 | 116235331 | Gm4312 | in region |
| 10 | 24890292 | 116235331 | Gm4340 | in region |
| 10 | 24890292 | 116235331 | Gm4792 | in region |
| 10 | 24890292 | 116235331 | Gm4794 | in region |
| 10 | 24890292 | 116235331 | Gm4799 | in region |
| 10 | 24890292 | 116235331 | Gm4925 | in region |
| 10 | 24890292 | 116235331 | Gm4981 | in region |
| 10 | 24890292 | 116235331 | Gm5134 | in region |
| 10 | 24890292 | 116235331 | Gm5136 | in region |
| 10 | 24890292 | 116235331 | Gm5176 | in region |
| 10 | 24890292 | 116235331 | Gm5424 | in region |
| 10 | 24890292 | 116235331 | Gm5779 | in region |
| 10 | 24890292 | 116235331 | Gm8394 | in region |
| 10 | 24890292 | 116235331 | Gm8580 | in region |
| 10 | 24890292 | 116235331 | Gm8709 | in region |
| 10 | 24890292 | 116235331 | Gm9766 | in region |
| 10 | 24890292 | 116235331 | Gm9767 | in region |
| 10 | 24890292 | 116235331 | Gm9786 | in region |
| 10 | 24890292 | 116235331 | Gm9855 | in region |
| 10 | 24890292 | 116235331 | Gna11  | in region |
| 10 | 24890292 | 116235331 | Gna15  | in region |
| 10 | 24890292 | 116235331 | Gnaz   | in region |
| 10 | 24890292 | 116235331 | Gng7   | in region |
| 10 | 24890292 | 116235331 | Gnptab | in region |
| 10 | 24890292 | 116235331 | Gopc   | in region |
| 10 | 24890292 | 116235331 | Gp49a  | in region |
| 10 | 24890292 | 116235331 | Gpr6   | in region |
| 10 | 24890292 | 116235331 | Gprc6a | in region |
| 10 | 24890292 | 116235331 | Gpx4   | in region |
| 10 | 24890292 | 116235331 | Grik2  | in region |
| 10 | 24890292 | 116235331 | Grin3b | in region |
| 10 | 24890292 | 116235331 | Gstt1  | in region |
| 10 | 24890292 | 116235331 | Gstt2  | in region |
| 10 | 24890292 | 116235331 | Gstt3  | in region |
| 10 | 24890292 | 116235331 | Gstt4  | in region |
| 10 | 24890292 | 116235331 | Gtf3c6 | in region |
| 10 | 24890292 | 116235331 | Gzmm   | in region |
| 10 | 24890292 | 116235331 | H2afy2 | in region |
| 10 | 24890292 | 116235331 | Hace1  | in region |
| 10 | 24890292 | 116235331 | Hal    | in region |
| 10 | 24890292 | 116235331 | Hcfc2  | in region |
| 10 | 24890292 | 116235331 | Hcn2   | in region |
| 10 | 24890292 | 116235331 | Hdac2  | in region |
| 10 | 24890292 | 116235331 | Hddc2  | in region |
| 10 | 24890292 | 116235331 | Herc4  | in region |
| 10 | 24890292 | 116235331 | Hey2   | in region |
| 10 | 24890292 | 116235331 | Hint3  | in region |
| 10 | 24890292 | 116235331 | Hk1    | in region |
| 10 | 24890292 | 116235331 | Hkdc1  | in region |
| 10 | 24890292 | 116235331 | Hmg20b | in region |
| 10 | 24890292 | 116235331 | Hmha1  | in region |

|    |          |                        |           |
|----|----------|------------------------|-----------|
| 10 | 24890292 | 116235331 Hnrnph3      | in region |
| 10 | 24890292 | 116235331 Hs3st5       | in region |
| 10 | 24890292 | 116235331 Hsf2         | in region |
| 10 | 24890292 | 116235331 Hsp90b1      | in region |
| 10 | 24890292 | 116235331 Icosl        | in region |
| 10 | 24890292 | 116235331 Igf1         | in region |
| 10 | 24890292 | 116235331 Ikbip        | in region |
| 10 | 24890292 | 116235331 Ilvbl        | in region |
| 10 | 24890292 | 116235331 Ipmk         | in region |
| 10 | 24890292 | 116235331 Itgb1bp3     | in region |
| 10 | 24890292 | 116235331 Itgb2        | in region |
| 10 | 24890292 | 116235331 Izumo4       | in region |
| 10 | 24890292 | 116235331 Jmjd1c       | in region |
| 10 | 24890292 | 116235331 Jsrb1        | in region |
| 10 | 24890292 | 116235331 Kcnc2        | in region |
| 10 | 24890292 | 116235331 Kcnmb4       | in region |
| 10 | 24890292 | 116235331 Kera         | in region |
| 10 | 24890292 | 116235331 Kiss1r       | in region |
| 10 | 24890292 | 116235331 Kitl         | in region |
| 10 | 24890292 | 116235331 Klf16        | in region |
| 10 | 24890292 | 116235331 Krr1         | in region |
| 10 | 24890292 | 116235331 Krtap10-10   | in region |
| 10 | 24890292 | 116235331 Krtap10-4    | in region |
| 10 | 24890292 | 116235331 Krtap12-1    | in region |
| 10 | 24890292 | 116235331 L3mbtl3      | in region |
| 10 | 24890292 | 116235331 LOC100009614 | in region |
| 10 | 24890292 | 116235331 LOC100045653 | in region |
| 10 | 24890292 | 116235331 LOC100302688 | in region |
| 10 | 24890292 | 116235331 LOC100417125 | in region |
| 10 | 24890292 | 116235331 LOC100502820 | in region |
| 10 | 24890292 | 116235331 LOC100502831 | in region |
| 10 | 24890292 | 116235331 LOC100502868 | in region |
| 10 | 24890292 | 116235331 LOC100502920 | in region |
| 10 | 24890292 | 116235331 LOC100502921 | in region |
| 10 | 24890292 | 116235331 LOC100502953 | in region |
| 10 | 24890292 | 116235331 LOC100503388 | in region |
| 10 | 24890292 | 116235331 LOC100504069 | in region |
| 10 | 24890292 | 116235331 LOC100504202 | in region |
| 10 | 24890292 | 116235331 LOC16697     | in region |
| 10 | 24890292 | 116235331 LOC432488    | in region |
| 10 | 24890292 | 116235331 Lace1        | in region |
| 10 | 24890292 | 116235331 Lama2        | in region |
| 10 | 24890292 | 116235331 Lama4        | in region |
| 10 | 24890292 | 116235331 Lgr5         | in region |
| 10 | 24890292 | 116235331 Lilrb4       | in region |
| 10 | 24890292 | 116235331 Lims1        | in region |
| 10 | 24890292 | 116235331 Lin28b       | in region |
| 10 | 24890292 | 116235331 Lin7a        | in region |
| 10 | 24890292 | 116235331 Lingo3       | in region |
| 10 | 24890292 | 116235331 Lmn2         | in region |
| 10 | 24890292 | 116235331 Lrrc20       | in region |
| 10 | 24890292 | 116235331 Lrrc3        | in region |

|    |          |           |           |           |
|----|----------|-----------|-----------|-----------|
| 10 | 24890292 | 116235331 | Lrriq1    | in region |
| 10 | 24890292 | 116235331 | Lrrtm3    | in region |
| 10 | 24890292 | 116235331 | Lsm7      | in region |
| 10 | 24890292 | 116235331 | Lss       | in region |
| 10 | 24890292 | 116235331 | Lta4h     | in region |
| 10 | 24890292 | 116235331 | Lum       | in region |
| 10 | 24890292 | 116235331 | Madcam1   | in region |
| 10 | 24890292 | 116235331 | Man1a     | in region |
| 10 | 24890292 | 116235331 | Map2k2    | in region |
| 10 | 24890292 | 116235331 | Marcks    | in region |
| 10 | 24890292 | 116235331 | Matk      | in region |
| 10 | 24890292 | 116235331 | Mbd3      | in region |
| 10 | 24890292 | 116235331 | Mcm3ap    | in region |
| 10 | 24890292 | 116235331 | Mcm9      | in region |
| 10 | 24890292 | 116235331 | Med16     | in region |
| 10 | 24890292 | 116235331 | Metap2    | in region |
| 10 | 24890292 | 116235331 | Mex3d     | in region |
| 10 | 24890292 | 116235331 | Mgat4c    | in region |
| 10 | 24890292 | 116235331 | Mical1    | in region |
| 10 | 24890292 | 116235331 | Midn      | in region |
| 10 | 24890292 | 116235331 | Mier2     | in region |
| 10 | 24890292 | 116235331 | Mif       | in region |
| 10 | 24890292 | 116235331 | Mir1251   | in region |
| 10 | 24890292 | 116235331 | Mir135a-2 | in region |
| 10 | 24890292 | 116235331 | Mir1929   | in region |
| 10 | 24890292 | 116235331 | Mir1930   | in region |
| 10 | 24890292 | 116235331 | Mir1931   | in region |
| 10 | 24890292 | 116235331 | Mir1982   | in region |
| 10 | 24890292 | 116235331 | Mir3057   | in region |
| 10 | 24890292 | 116235331 | Mir3058   | in region |
| 10 | 24890292 | 116235331 | Mir3059   | in region |
| 10 | 24890292 | 116235331 | Mir331    | in region |
| 10 | 24890292 | 116235331 | Mir678    | in region |
| 10 | 24890292 | 116235331 | Mknk2     | in region |
| 10 | 24890292 | 116235331 | Mmp11     | in region |
| 10 | 24890292 | 116235331 | Mobkl2a   | in region |
| 10 | 24890292 | 116235331 | Mrpl42    | in region |
| 10 | 24890292 | 116235331 | Mrpl54    | in region |
| 10 | 24890292 | 116235331 | Msl3l2    | in region |
| 10 | 24890292 | 116235331 | Mterfd3   | in region |
| 10 | 24890292 | 116235331 | Mum1      | in region |
| 10 | 24890292 | 116235331 | Mybpc1    | in region |
| 10 | 24890292 | 116235331 | Myf5      | in region |
| 10 | 24890292 | 116235331 | Myf6      | in region |
| 10 | 24890292 | 116235331 | Mypn      | in region |
| 10 | 24890292 | 116235331 | Nap111    | in region |
| 10 | 24890292 | 116235331 | Nav3      | in region |
| 10 | 24890292 | 116235331 | Ncln      | in region |
| 10 | 24890292 | 116235331 | Ncoa7     | in region |
| 10 | 24890292 | 116235331 | Ndufa12   | in region |
| 10 | 24890292 | 116235331 | Ndufs7    | in region |
| 10 | 24890292 | 116235331 | Nedd1     | in region |



|    |          |                    |           |
|----|----------|--------------------|-----------|
| 10 | 24890292 | 116235331 Nepn     | in region |
| 10 | 24890292 | 116235331 Neurog3  | in region |
| 10 | 24890292 | 116235331 Nfic     | in region |
| 10 | 24890292 | 116235331 Nfyb     | in region |
| 10 | 24890292 | 116235331 Nkain2   | in region |
| 10 | 24890292 | 116235331 Nodal    | in region |
| 10 | 24890292 | 116235331 Npffr1   | in region |
| 10 | 24890292 | 116235331 Nr1h4    | in region |
| 10 | 24890292 | 116235331 Nr2c1    | in region |
| 10 | 24890292 | 116235331 Nr2e1    | in region |
| 10 | 24890292 | 116235331 Nrbf2    | in region |
| 10 | 24890292 | 116235331 Nt5dc1   | in region |
| 10 | 24890292 | 116235331 Nt5dc3   | in region |
| 10 | 24890292 | 116235331 Ntn4     | in region |
| 10 | 24890292 | 116235331 Nts      | in region |
| 10 | 24890292 | 116235331 Nuak1    | in region |
| 10 | 24890292 | 116235331 Nudt4    | in region |
| 10 | 24890292 | 116235331 Nup37    | in region |
| 10 | 24890292 | 116235331 Nus1     | in region |
| 10 | 24890292 | 116235331 ORF61    | in region |
| 10 | 24890292 | 116235331 Oaz1     | in region |
| 10 | 24890292 | 116235331 Odf3l2   | in region |
| 10 | 24890292 | 116235331 Oit3     | in region |
| 10 | 24890292 | 116235331 Olfr1351 | in region |
| 10 | 24890292 | 116235331 Olfr1352 | in region |
| 10 | 24890292 | 116235331 Olfr1353 | in region |
| 10 | 24890292 | 116235331 Olfr1354 | in region |
| 10 | 24890292 | 116235331 Olfr1355 | in region |
| 10 | 24890292 | 116235331 Olfr1356 | in region |
| 10 | 24890292 | 116235331 Olfr1357 | in region |
| 10 | 24890292 | 116235331 Olfr57   | in region |
| 10 | 24890292 | 116235331 Olfr8    | in region |
| 10 | 24890292 | 116235331 Onecut3  | in region |
| 10 | 24890292 | 116235331 Osbpl8   | in region |
| 10 | 24890292 | 116235331 Ostm1    | in region |
| 10 | 24890292 | 116235331 Otogl    | in region |
| 10 | 24890292 | 116235331 P4ha1    | in region |
| 10 | 24890292 | 116235331 Pah      | in region |
| 10 | 24890292 | 116235331 Palm     | in region |
| 10 | 24890292 | 116235331 Pawr     | in region |
| 10 | 24890292 | 116235331 Pbl1     | in region |
| 10 | 24890292 | 116235331 Pbl2     | in region |
| 10 | 24890292 | 116235331 Pcbd1    | in region |
| 10 | 24890292 | 116235331 Pcbp3    | in region |
| 10 | 24890292 | 116235331 Pcdh15   | in region |
| 10 | 24890292 | 116235331 Pcnt     | in region |
| 10 | 24890292 | 116235331 Pcsk4    | in region |
| 10 | 24890292 | 116235331 Pdss2    | in region |
| 10 | 24890292 | 116235331 Pdxk     | in region |
| 10 | 24890292 | 116235331 Pfk1     | in region |
| 10 | 24890292 | 116235331 Phlda1   | in region |
| 10 | 24890292 | 116235331 Phyhipl  | in region |

|    |          |                    |           |
|----|----------|--------------------|-----------|
| 10 | 24890292 | 116235331 Pias4    | in region |
| 10 | 24890292 | 116235331 Pip5k1c  | in region |
| 10 | 24890292 | 116235331 Pkib     | in region |
| 10 | 24890292 | 116235331 Pla2g12b | in region |
| 10 | 24890292 | 116235331 Pldi     | in region |
| 10 | 24890292 | 116235331 Plekhj1  | in region |
| 10 | 24890292 | 116235331 Plk5     | in region |
| 10 | 24890292 | 116235331 Pln      | in region |
| 10 | 24890292 | 116235331 Plxnc1   | in region |
| 10 | 24890292 | 116235331 Pmch     | in region |
| 10 | 24890292 | 116235331 Poc1b    | in region |
| 10 | 24890292 | 116235331 Pofut2   | in region |
| 10 | 24890292 | 116235331 Polr2e   | in region |
| 10 | 24890292 | 116235331 Polr3b   | in region |
| 10 | 24890292 | 116235331 Polrmt   | in region |
| 10 | 24890292 | 116235331 Popdc3   | in region |
| 10 | 24890292 | 116235331 Ppa1     | in region |
| 10 | 24890292 | 116235331 Ppap2c   | in region |
| 10 | 24890292 | 116235331 Ppfia2   | in region |
| 10 | 24890292 | 116235331 Ppil6    | in region |
| 10 | 24890292 | 116235331 Ppp1r12a | in region |
| 10 | 24890292 | 116235331 Prdm1    | in region |
| 10 | 24890292 | 116235331 Prdm4    | in region |
| 10 | 24890292 | 116235331 Prep     | in region |
| 10 | 24890292 | 116235331 Prf1     | in region |
| 10 | 24890292 | 116235331 Prmt2    | in region |
| 10 | 24890292 | 116235331 Prssl1   | in region |
| 10 | 24890292 | 116235331 Prtn3    | in region |
| 10 | 24890292 | 116235331 Psap     | in region |
| 10 | 24890292 | 116235331 Ptbp1    | in region |
| 10 | 24890292 | 116235331 Ptprb    | in region |
| 10 | 24890292 | 116235331 Ptprk    | in region |
| 10 | 24890292 | 116235331 Ptprq    | in region |
| 10 | 24890292 | 116235331 Ptprr    | in region |
| 10 | 24890292 | 116235331 Pttg1ip  | in region |
| 10 | 24890292 | 116235331 Pwp1     | in region |
| 10 | 24890292 | 116235331 Pwp2     | in region |
| 10 | 24890292 | 116235331 Qrs11    | in region |
| 10 | 24890292 | 116235331 Rab21    | in region |
| 10 | 24890292 | 116235331 Rab36    | in region |
| 10 | 24890292 | 116235331 Ranbp2   | in region |
| 10 | 24890292 | 116235331 Rassf9   | in region |
| 10 | 24890292 | 116235331 Reep3    | in region |
| 10 | 24890292 | 116235331 Reep6    | in region |
| 10 | 24890292 | 116235331 Rev3l    | in region |
| 10 | 24890292 | 116235331 REXO1    | in region |
| 10 | 24890292 | 116235331 Rfpl4b   | in region |
| 10 | 24890292 | 116235331 Rfx4     | in region |
| 10 | 24890292 | 116235331 Rfx6     | in region |
| 10 | 24890292 | 116235331 Rhobtb1  | in region |
| 10 | 24890292 | 116235331 Ric8b    | in region |
| 10 | 24890292 | 116235331 Rmst     | in region |

|    |          |                    |           |
|----|----------|--------------------|-----------|
| 10 | 24890292 | 116235331 Rnf126   | in region |
| 10 | 24890292 | 116235331 Rnf146   | in region |
| 10 | 24890292 | 116235331 Rnf217   | in region |
| 10 | 24890292 | 116235331 Ros1     | in region |
| 10 | 24890292 | 116235331 Rpf2     | in region |
| 10 | 24890292 | 116235331 Rps15    | in region |
| 10 | 24890292 | 116235331 Rrp1     | in region |
| 10 | 24890292 | 116235331 Rsph4a   | in region |
| 10 | 24890292 | 116235331 Rspo3    | in region |
| 10 | 24890292 | 116235331 Rtdr1    | in region |
| 10 | 24890292 | 116235331 Rtkn2    | in region |
| 10 | 24890292 | 116235331 Rtn4ip1  | in region |
| 10 | 24890292 | 116235331 Rufy2    | in region |
| 10 | 24890292 | 116235331 Rwdd1    | in region |
| 10 | 24890292 | 116235331 S100b    | in region |
| 10 | 24890292 | 116235331 S1pr4    | in region |
| 10 | 24890292 | 116235331 Samd3    | in region |
| 10 | 24890292 | 116235331 Sar1a    | in region |
| 10 | 24890292 | 116235331 Sbno2    | in region |
| 10 | 24890292 | 116235331 Scamp4   | in region |
| 10 | 24890292 | 116235331 Scml4    | in region |
| 10 | 24890292 | 116235331 Scyl2    | in region |
| 10 | 24890292 | 116235331 Sec63    | in region |
| 10 | 24890292 | 116235331 Sept10   | in region |
| 10 | 24890292 | 116235331 Serinc1  | in region |
| 10 | 24890292 | 116235331 Sesn1    | in region |
| 10 | 24890292 | 116235331 Sf3a2    | in region |
| 10 | 24890292 | 116235331 Sgpl1    | in region |
| 10 | 24890292 | 116235331 Sgta     | in region |
| 10 | 24890292 | 116235331 Sh3rf3   | in region |
| 10 | 24890292 | 116235331 Shc2     | in region |
| 10 | 24890292 | 116235331 Sim1     | in region |
| 10 | 24890292 | 116235331 Sirt1    | in region |
| 10 | 24890292 | 116235331 Sirt6    | in region |
| 10 | 24890292 | 116235331 Slc16a10 | in region |
| 10 | 24890292 | 116235331 Slc16a9  | in region |
| 10 | 24890292 | 116235331 Slc17a8  | in region |
| 10 | 24890292 | 116235331 Slc19a1  | in region |
| 10 | 24890292 | 116235331 Slc1a6   | in region |
| 10 | 24890292 | 116235331 Slc22a16 | in region |
| 10 | 24890292 | 116235331 Slc25a16 | in region |
| 10 | 24890292 | 116235331 Slc25a3  | in region |
| 10 | 24890292 | 116235331 Slc29a3  | in region |
| 10 | 24890292 | 116235331 Slc35f1  | in region |
| 10 | 24890292 | 116235331 Slc39a3  | in region |
| 10 | 24890292 | 116235331 Slc41a2  | in region |
| 10 | 24890292 | 116235331 Slc5a4a  | in region |
| 10 | 24890292 | 116235331 Slc5a4b  | in region |
| 10 | 24890292 | 116235331 Slc5a8   | in region |
| 10 | 24890292 | 116235331 Slc6a15  | in region |
| 10 | 24890292 | 116235331 Smarcb1  | in region |
| 10 | 24890292 | 116235331 Smpd2    | in region |

|    |          |                      |           |
|----|----------|----------------------|-----------|
| 10 | 24890292 | 116235331 Smpd13a    | in region |
| 10 | 24890292 | 116235331 Snord37    | in region |
| 10 | 24890292 | 116235331 Snrpd3     | in region |
| 10 | 24890292 | 116235331 Snrpf      | in region |
| 10 | 24890292 | 116235331 Snx3       | in region |
| 10 | 24890292 | 116235331 Sobp       | in region |
| 10 | 24890292 | 116235331 Socs2      | in region |
| 10 | 24890292 | 116235331 Specc1l    | in region |
| 10 | 24890292 | 116235331 Speer5-ps1 | in region |
| 10 | 24890292 | 116235331 Spic       | in region |
| 10 | 24890292 | 116235331 Spock2     | in region |
| 10 | 24890292 | 116235331 Srgn       | in region |
| 10 | 24890292 | 116235331 Stab2      | in region |
| 10 | 24890292 | 116235331 Stk11      | in region |
| 10 | 24890292 | 116235331 Stox1      | in region |
| 10 | 24890292 | 116235331 Sult3a1    | in region |
| 10 | 24890292 | 116235331 Sumo3      | in region |
| 10 | 24890292 | 116235331 Supv3l1    | in region |
| 10 | 24890292 | 116235331 Susd2      | in region |
| 10 | 24890292 | 116235331 Sycp3      | in region |
| 10 | 24890292 | 116235331 Syde1      | in region |
| 10 | 24890292 | 116235331 Syn3       | in region |
| 10 | 24890292 | 116235331 Syt1       | in region |
| 10 | 24890292 | 116235331 Tacr2      | in region |
| 10 | 24890292 | 116235331 Tbat       | in region |
| 10 | 24890292 | 116235331 Tbc1d15    | in region |
| 10 | 24890292 | 116235331 Tbx        | in region |
| 10 | 24890292 | 116235331 Tbx2r      | in region |
| 10 | 24890292 | 116235331 Tcf3       | in region |
| 10 | 24890292 | 116235331 Tcp1l12    | in region |
| 10 | 24890292 | 116235331 Tdg        | in region |
| 10 | 24890292 | 116235331 Tet1       | in region |
| 10 | 24890292 | 116235331 Tfam       | in region |
| 10 | 24890292 | 116235331 Thap2      | in region |
| 10 | 24890292 | 116235331 Theg       | in region |
| 10 | 24890292 | 116235331 Themis     | in region |
| 10 | 24890292 | 116235331 Thop1      | in region |
| 10 | 24890292 | 116235331 Timm13     | in region |
| 10 | 24890292 | 116235331 Timp3      | in region |
| 10 | 24890292 | 116235331 Tjp3       | in region |
| 10 | 24890292 | 116235331 Tle2       | in region |
| 10 | 24890292 | 116235331 Tle6       | in region |
| 10 | 24890292 | 116235331 Tmcc3      | in region |
| 10 | 24890292 | 116235331 Tmem19     | in region |
| 10 | 24890292 | 116235331 Tmem200a   | in region |
| 10 | 24890292 | 116235331 Tmem26     | in region |
| 10 | 24890292 | 116235331 Tmpo       | in region |
| 10 | 24890292 | 116235331 Tmprss9    | in region |
| 10 | 24890292 | 116235331 Tmtc2      | in region |
| 10 | 24890292 | 116235331 Tmtc3      | in region |
| 10 | 24890292 | 116235331 Tpd52l1    | in region |
| 10 | 24890292 | 116235331 Tph2       | in region |
| 10 | 24890292 | 116235331 Traf3ip2   | in region |

|    |           |                         |           |
|----|-----------|-------------------------|-----------|
| 10 | 24890292  | 116235331 Trappc10      | in region |
| 10 | 24890292  | 116235331 Trdn          | in region |
| 10 | 24890292  | 116235331 Trhde         | in region |
| 10 | 24890292  | 116235331 Trmt11        | in region |
| 10 | 24890292  | 116235331 Trpm2         | in region |
| 10 | 24890292  | 116235331 Tspan15       | in region |
| 10 | 24890292  | 116235331 Tspan8        | in region |
| 10 | 24890292  | 116235331 Tspyl1        | in region |
| 10 | 24890292  | 116235331 Tspyl4        | in region |
| 10 | 24890292  | 116235331 Tube1         | in region |
| 10 | 24890292  | 116235331 Txnrd1        | in region |
| 10 | 24890292  | 116235331 Tyms-ps       | in region |
| 10 | 24890292  | 116235331 Tysnd1        | in region |
| 10 | 24890292  | 116235331 Ube2d1        | in region |
| 10 | 24890292  | 116235331 Ube2g2        | in region |
| 10 | 24890292  | 116235331 Ube2n         | in region |
| 10 | 24890292  | 116235331 Uhrf1bp11     | in region |
| 10 | 24890292  | 116235331 Unc5b         | in region |
| 10 | 24890292  | 116235331 Upb1          | in region |
| 10 | 24890292  | 116235331 Uqcr11        | in region |
| 10 | 24890292  | 116235331 Usp44         | in region |
| 10 | 24890292  | 116235331 Utp20         | in region |
| 10 | 24890292  | 116235331 Vezt          | in region |
| 10 | 24890292  | 116235331 Vgll2         | in region |
| 10 | 24890292  | 116235331 Vmn2r80       | in region |
| 10 | 24890292  | 116235331 Vmn2r81       | in region |
| 10 | 24890292  | 116235331 Vmn2r82       | in region |
| 10 | 24890292  | 116235331 Vmn2r83       | in region |
| 10 | 24890292  | 116235331 Vpreb3        | in region |
| 10 | 24890292  | 116235331 Vps26a        | in region |
| 10 | 24890292  | 116235331 Wasf1         | in region |
| 10 | 24890292  | 116235331 Wdr18         | in region |
| 10 | 24890292  | 116235331 Wisp3         | in region |
| 10 | 24890292  | 116235331 X99384        | in region |
| 10 | 24890292  | 116235331 Ybey          | in region |
| 10 | 24890292  | 116235331 Zbtb24        | in region |
| 10 | 24890292  | 116235331 Zbtb7a        | in region |
| 10 | 24890292  | 116235331 Zdhhc17       | in region |
| 10 | 24890292  | 116235331 Zfa           | in region |
| 10 | 24890292  | 116235331 Zfc3h1        | in region |
| 10 | 24890292  | 116235331 Zfp280b       | in region |
| 10 | 24890292  | 116235331 Zfp365        | in region |
| 10 | 24890292  | 116235331 Zfp781        | in region |
| 10 | 24890292  | 116235331 Zfp873        | in region |
| 10 | 24890292  | 116235331 Zfp938        | in region |
| 10 | 24890292  | 116235331 Zfr2          | in region |
| 10 | 24890292  | 116235331 Zufsp         | in region |
| 10 | 24890292  | 116235331 Zwint         | in region |
| 10 | 117991378 | 129970926 1110012D08Rik | in region |
| 10 | 117991378 | 129970926 4921513I03Rik | in region |
| 10 | 117991378 | 129970926 4930503E24Rik | in region |
| 10 | 117991378 | 129970926 5830405N20Rik | in region |

|    |           |                         |           |
|----|-----------|-------------------------|-----------|
| 10 | 117991378 | 129970926 Agap2         | in region |
| 10 | 117991378 | 129970926 Ankrd52       | in region |
| 10 | 117991378 | 129970926 Apof          | in region |
| 10 | 117991378 | 129970926 Apon          | in region |
| 10 | 117991378 | 129970926 Arhgap9       | in region |
| 10 | 117991378 | 129970926 Arhgef25      | in region |
| 10 | 117991378 | 129970926 Atp5b         | in region |
| 10 | 117991378 | 129970926 Avil          | in region |
| 10 | 117991378 | 129970926 Avpr1a        | in region |
| 10 | 117991378 | 129970926 B4galnt1      | in region |
| 10 | 117991378 | 129970926 BC048403      | in region |
| 10 | 117991378 | 129970926 BC089597      | in region |
| 10 | 117991378 | 129970926 Baz2a         | in region |
| 10 | 117991378 | 129970926 Bloc1s1       | in region |
| 10 | 117991378 | 129970926 Cand1         | in region |
| 10 | 117991378 | 129970926 Cd63          | in region |
| 10 | 117991378 | 129970926 Cdk2          | in region |
| 10 | 117991378 | 129970926 Cdk4          | in region |
| 10 | 117991378 | 129970926 Cnpy2         | in region |
| 10 | 117991378 | 129970926 Coq10a        | in region |
| 10 | 117991378 | 129970926 Cs            | in region |
| 10 | 117991378 | 129970926 Ctdsp2        | in region |
| 10 | 117991378 | 129970926 Cyp27b1       | in region |
| 10 | 117991378 | 129970926 D930020B18Rik | in region |
| 10 | 117991378 | 129970926 Dctn2         | in region |
| 10 | 117991378 | 129970926 Ddit3         | in region |
| 10 | 117991378 | 129970926 Dgka          | in region |
| 10 | 117991378 | 129970926 Dnajc14       | in region |
| 10 | 117991378 | 129970926 Dtx3          | in region |
| 10 | 117991378 | 129970926 Dyrk2         | in region |
| 10 | 117991378 | 129970926 Erbb3         | in region |
| 10 | 117991378 | 129970926 Esyt1         | in region |
| 10 | 117991378 | 129970926 Fam19a2       | in region |
| 10 | 117991378 | 129970926 Gdf11         | in region |
| 10 | 117991378 | 129970926 Gli1          | in region |
| 10 | 117991378 | 129970926 Glis2         | in region |
| 10 | 117991378 | 129970926 Gm4489        | in region |
| 10 | 117991378 | 129970926 Gm9079        | in region |
| 10 | 117991378 | 129970926 Gns           | in region |
| 10 | 117991378 | 129970926 Gpr182        | in region |
| 10 | 117991378 | 129970926 Grip1         | in region |
| 10 | 117991378 | 129970926 Helb          | in region |
| 10 | 117991378 | 129970926 Hmga2         | in region |
| 10 | 117991378 | 129970926 Hsd17b6       | in region |
| 10 | 117991378 | 129970926 Ikzf4         | in region |
| 10 | 117991378 | 129970926 Il23a         | in region |
| 10 | 117991378 | 129970926 Inhbc         | in region |
| 10 | 117991378 | 129970926 Inhbe         | in region |
| 10 | 117991378 | 129970926 Irak3         | in region |
| 10 | 117991378 | 129970926 Itga7         | in region |
| 10 | 117991378 | 129970926 Kif5a         | in region |
| 10 | 117991378 | 129970926 LOC100504608  | in region |

|    |           |                        |           |
|----|-----------|------------------------|-----------|
| 10 | 117991378 | 129970926 LOC100504616 | in region |
| 10 | 117991378 | 129970926 Lemd3        | in region |
| 10 | 117991378 | 129970926 Liph         | in region |
| 10 | 117991378 | 129970926 Lrig3        | in region |
| 10 | 117991378 | 129970926 Lrp1         | in region |
| 10 | 117991378 | 129970926 March9       | in region |
| 10 | 117991378 | 129970926 Mars         | in region |
| 10 | 117991378 | 129970926 Mbd6         | in region |
| 10 | 117991378 | 129970926 Mettl1       | in region |
| 10 | 117991378 | 129970926 Mettl7b      | in region |
| 10 | 117991378 | 129970926 Mip          | in region |
| 10 | 117991378 | 129970926 Mir26a-2     | in region |
| 10 | 117991378 | 129970926 Mir546       | in region |
| 10 | 117991378 | 129970926 Mir677       | in region |
| 10 | 117991378 | 129970926 Mir763       | in region |
| 10 | 117991378 | 129970926 Mirlet7i     | in region |
| 10 | 117991378 | 129970926 Mmp19        | in region |
| 10 | 117991378 | 129970926 Mon2         | in region |
| 10 | 117991378 | 129970926 Msrb3        | in region |
| 10 | 117991378 | 129970926 Myl6         | in region |
| 10 | 117991378 | 129970926 Myl6b        | in region |
| 10 | 117991378 | 129970926 Myo1a        | in region |
| 10 | 117991378 | 129970926 Nab2         | in region |
| 10 | 117991378 | 129970926 Naca         | in region |
| 10 | 117991378 | 129970926 Ndufa4l2     | in region |
| 10 | 117991378 | 129970926 Neurod4      | in region |
| 10 | 117991378 | 129970926 Nxph4        | in region |
| 10 | 117991378 | 129970926 Obfc2b       | in region |
| 10 | 117991378 | 129970926 Olfr247      | in region |
| 10 | 117991378 | 129970926 Olfr763      | in region |
| 10 | 117991378 | 129970926 Olfr765      | in region |
| 10 | 117991378 | 129970926 Olfr767      | in region |
| 10 | 117991378 | 129970926 Olfr768      | in region |
| 10 | 117991378 | 129970926 Olfr769      | in region |
| 10 | 117991378 | 129970926 Olfr770      | in region |
| 10 | 117991378 | 129970926 Olfr771      | in region |
| 10 | 117991378 | 129970926 Olfr772      | in region |
| 10 | 117991378 | 129970926 Olfr773      | in region |
| 10 | 117991378 | 129970926 Olfr774      | in region |
| 10 | 117991378 | 129970926 Olfr775      | in region |
| 10 | 117991378 | 129970926 Olfr776      | in region |
| 10 | 117991378 | 129970926 Olfr777      | in region |
| 10 | 117991378 | 129970926 Olfr780      | in region |
| 10 | 117991378 | 129970926 Olfr781      | in region |
| 10 | 117991378 | 129970926 Olfr782      | in region |
| 10 | 117991378 | 129970926 Olfr784      | in region |
| 10 | 117991378 | 129970926 Olfr786      | in region |
| 10 | 117991378 | 129970926 Olfr787      | in region |
| 10 | 117991378 | 129970926 Olfr788      | in region |
| 10 | 117991378 | 129970926 Olfr790      | in region |
| 10 | 117991378 | 129970926 Olfr791      | in region |
| 10 | 117991378 | 129970926 Olfr792      | in region |

|    |           |                    |           |
|----|-----------|--------------------|-----------|
| 10 | 117991378 | 129970926 Olfr794  | in region |
| 10 | 117991378 | 129970926 Olfr796  | in region |
| 10 | 117991378 | 129970926 Olfr798  | in region |
| 10 | 117991378 | 129970926 Olfr799  | in region |
| 10 | 117991378 | 129970926 Olfr800  | in region |
| 10 | 117991378 | 129970926 Olfr801  | in region |
| 10 | 117991378 | 129970926 Olfr802  | in region |
| 10 | 117991378 | 129970926 Olfr803  | in region |
| 10 | 117991378 | 129970926 Olfr804  | in region |
| 10 | 117991378 | 129970926 Olfr805  | in region |
| 10 | 117991378 | 129970926 Olfr806  | in region |
| 10 | 117991378 | 129970926 Olfr807  | in region |
| 10 | 117991378 | 129970926 Olfr808  | in region |
| 10 | 117991378 | 129970926 Olfr809  | in region |
| 10 | 117991378 | 129970926 Olfr810  | in region |
| 10 | 117991378 | 129970926 Olfr811  | in region |
| 10 | 117991378 | 129970926 Olfr812  | in region |
| 10 | 117991378 | 129970926 Olfr813  | in region |
| 10 | 117991378 | 129970926 Olfr814  | in region |
| 10 | 117991378 | 129970926 Olfr815  | in region |
| 10 | 117991378 | 129970926 Olfr816  | in region |
| 10 | 117991378 | 129970926 Olfr818  | in region |
| 10 | 117991378 | 129970926 Olfr819  | in region |
| 10 | 117991378 | 129970926 Olfr820  | in region |
| 10 | 117991378 | 129970926 Olfr821  | in region |
| 10 | 117991378 | 129970926 Olfr822  | in region |
| 10 | 117991378 | 129970926 Olfr823  | in region |
| 10 | 117991378 | 129970926 Olfr824  | in region |
| 10 | 117991378 | 129970926 Olfr825  | in region |
| 10 | 117991378 | 129970926 Olfr826  | in region |
| 10 | 117991378 | 129970926 Olfr827  | in region |
| 10 | 117991378 | 129970926 Olfr9    | in region |
| 10 | 117991378 | 129970926 Ormdl2   | in region |
| 10 | 117991378 | 129970926 Os9      | in region |
| 10 | 117991378 | 129970926 Pa2g4    | in region |
| 10 | 117991378 | 129970926 Pan2     | in region |
| 10 | 117991378 | 129970926 Pip4k2c  | in region |
| 10 | 117991378 | 129970926 Pmel     | in region |
| 10 | 117991378 | 129970926 Ppm1h    | in region |
| 10 | 117991378 | 129970926 Prim1    | in region |
| 10 | 117991378 | 129970926 Ptges3   | in region |
| 10 | 117991378 | 129970926 R3hdm2   | in region |
| 10 | 117991378 | 129970926 Rab5b    | in region |
| 10 | 117991378 | 129970926 Rassf3   | in region |
| 10 | 117991378 | 129970926 Rbms2    | in region |
| 10 | 117991378 | 129970926 Rdh1     | in region |
| 10 | 117991378 | 129970926 Rdh16    | in region |
| 10 | 117991378 | 129970926 Rdh18-ps | in region |
| 10 | 117991378 | 129970926 Rdh19    | in region |
| 10 | 117991378 | 129970926 Rdh5     | in region |
| 10 | 117991378 | 129970926 Rdh7     | in region |
| 10 | 117991378 | 129970926 Rdh9     | in region |



|    |           |                         |                         |
|----|-----------|-------------------------|-------------------------|
| 10 | 117991378 | 129970926 Rnf41         | in region               |
| 10 | 117991378 | 129970926 Rpl41         | in region               |
| 10 | 117991378 | 129970926 Rps26         | in region               |
| 10 | 117991378 | 129970926 Sarnp         | in region               |
| 10 | 117991378 | 129970926 Sdr9c7        | in region               |
| 10 | 117991378 | 129970926 Shmt2         | in region               |
| 10 | 117991378 | 129970926 Slc16a7       | in region               |
| 10 | 117991378 | 129970926 Slc26a10      | in region               |
| 10 | 117991378 | 129970926 Slc39a5       | in region               |
| 10 | 117991378 | 129970926 Smarcc2       | in region               |
| 10 | 117991378 | 129970926 Spryd4        | in region               |
| 10 | 117991378 | 129970926 Srgap1        | in region               |
| 10 | 117991378 | 129970926 Stac3         | in region               |
| 10 | 117991378 | 129970926 Stat2         | in region               |
| 10 | 117991378 | 129970926 Stat6         | in region               |
| 10 | 117991378 | 129970926 Suox          | in region               |
| 10 | 117991378 | 129970926 Tac2          | in region               |
| 10 | 117991378 | 129970926 Tbc1d30       | in region               |
| 10 | 117991378 | 129970926 Tbk1          | in region               |
| 10 | 117991378 | 129970926 Timeless      | in region               |
| 10 | 117991378 | 129970926 Tmbim4        | in region               |
| 10 | 117991378 | 129970926 Tmem194       | in region               |
| 10 | 117991378 | 129970926 Tmem5         | in region               |
| 10 | 117991378 | 129970926 Tsfm          | in region               |
| 10 | 117991378 | 129970926 Tspan31       | in region               |
| 10 | 117991378 | 129970926 Usp15         | in region               |
| 10 | 117991378 | 129970926 Vmn2r84       | in region               |
| 10 | 117991378 | 129970926 Vmn2r85       | in region               |
| 10 | 117991378 | 129970926 Vmn2r86       | in region               |
| 10 | 117991378 | 129970926 Vmn2r87       | in region               |
| 10 | 117991378 | 129970926 Wibg          | in region               |
| 10 | 117991378 | 129970926 Wif1          | in region               |
| 10 | 117991378 | 129970926 Xpot          | in region               |
| 10 | 117991378 | 129970926 Xrcc6bp1      | in region               |
| 10 | 117991378 | 129970926 Zbtb39        | in region               |
| 10 | 117991378 | 129970926 Zc3h10        | in region               |
| 10 | 122483482 | 122489166 Mon2          | in region               |
| 10 | 126789283 | 126793511 Inhbc         | in region               |
| 10 | 127160842 | 127163782 Tac2          | in region               |
| 11 | 31072193  | 31106391 Asb3           | closest upstream gene   |
| 11 | 31072193  | 31106391 Stc2           | closest downstream gene |
| 11 | 115308540 | 115453291 4933422H20Rik | in region               |
| 11 | 115308540 | 115453291 Armc7         | in region               |
| 11 | 115308540 | 115453291 Gga3          | in region               |
| 11 | 115308540 | 115453291 Hn1           | in region               |
| 11 | 115308540 | 115453291 Nt5c          | in region               |
| 11 | 115308540 | 115453291 Nup85         | in region               |
| 11 | 115308540 | 115453291 Slc16a5       | in region               |
| 11 | 115308540 | 115453291 Sumo2         | in region               |
| 12 | 26854616  | 26887931 Id2            | closest upstream gene   |
| 12 | 26854616  | 26887931 Rnf144a        | closest downstream gene |
| 12 | 29447058  | 29449190 Tssc1          | in region               |

|    |           |                        |                         |
|----|-----------|------------------------|-------------------------|
| 13 | 23145965  | 23151286 Vmn1r214      | closest upstream gene   |
| 13 | 23145965  | 23151286 Vmn1r215      | closest downstream gene |
| 13 | 37481703  | 37490254 Ly86          | in region               |
| 13 | 59499863  | 59521760 Ntrk2         | closest upstream gene   |
| 13 | 59499863  | 59521760 Agtpbp1       | closest downstream gene |
| 13 | 118340741 | 118360308 Emb          | closest upstream gene   |
| 13 | 118340741 | 118360308 Hcn1         | closest downstream gene |
| 14 | 3042998   | 7743192 1700110I01Rik  | in region               |
| 14 | 3042998   | 7743192 4930555G01Rik  | in region               |
| 14 | 3042998   | 7743192 D830030K20Rik  | in region               |
| 14 | 3042998   | 7743192 ENSMUSG000000C | in region               |
| 14 | 3042998   | 7743192 Gm1973         | in region               |
| 14 | 3042998   | 7743192 Gm2897         | in region               |
| 14 | 3042998   | 7743192 Gm3002         | in region               |
| 14 | 3042998   | 7743192 Gm3020         | in region               |
| 14 | 3042998   | 7743192 Gm8348         | in region               |
| 14 | 30304061  | 30318535 Cacna2d3      | in region               |
| 14 | 30776359  | 30782644 Selk          | in region               |
| 14 | 32995250  | 33023641 Parg          | in region               |
| 14 | 32995250  | 33023641 Timm23        | in region               |
| 14 | 33067709  | 33079216 Parg          | in region               |
| 14 | 33115313  | 33130567 Parg          | closest upstream gene   |
| 14 | 33115313  | 33130567 Ogdhl         | closest downstream gene |
| 14 | 41974937  | 44405431 1700001F09Rik | in region               |
| 14 | 41974937  | 44405431 Ear1          | in region               |
| 14 | 41974937  | 44405431 Gm10375       | in region               |
| 14 | 41974937  | 44405431 Sftpd         | in region               |
| 14 | 44541223  | 44541223 Ang5          | closest upstream gene   |
| 14 | 44541223  | 44541223 Ang6          | closest downstream gene |
| 14 | 44616791  | 44616791 Ang6          | closest upstream gene   |
| 14 | 44616791  | 44616791 Ear2          | closest downstream gene |
| 14 | 45960904  | 45969147 Psmc6         | in region               |
| 14 | 48710887  | 91743057 1190002H23Rik | in region               |
| 14 | 48710887  | 91743057 1200011I18Rik | in region               |
| 14 | 48710887  | 91743057 1300010F03Rik | in region               |
| 14 | 48710887  | 91743057 1700011H14Rik | in region               |
| 14 | 48710887  | 91743057 1700108F19Rik | in region               |
| 14 | 48710887  | 91743057 1700109G14Rik | in region               |
| 14 | 48710887  | 91743057 1700123O20Rik | in region               |
| 14 | 48710887  | 91743057 1700129C05Rik | in region               |
| 14 | 48710887  | 91743057 2610027L16Rik | in region               |
| 14 | 48710887  | 91743057 2610301G19Rik | in region               |
| 14 | 48710887  | 91743057 3632451O06Rik | in region               |
| 14 | 48710887  | 91743057 4930578I06Rik | in region               |
| 14 | 48710887  | 91743057 4930579G18Rik | in region               |
| 14 | 48710887  | 91743057 4931414P19Rik | in region               |
| 14 | 48710887  | 91743057 4933429O19Rik | in region               |
| 14 | 48710887  | 91743057 5031414D18Rik | in region               |
| 14 | 48710887  | 91743057 6330409N04Rik | in region               |
| 14 | 48710887  | 91743057 6720456H20Rik | in region               |
| 14 | 48710887  | 91743057 9030625A04Rik | in region               |
| 14 | 48710887  | 91743057 9630013A20Rik | in region               |

|    |          |                        |           |
|----|----------|------------------------|-----------|
| 14 | 48710887 | 91743057 9930012K11Rik | in region |
| 14 | 48710887 | 91743057 AU021034      | in region |
| 14 | 48710887 | 91743057 AY358078      | in region |
| 14 | 48710887 | 91743057 Abhd4         | in region |
| 14 | 48710887 | 91743057 Acin1         | in region |
| 14 | 48710887 | 91743057 Adam2         | in region |
| 14 | 48710887 | 91743057 Adam28        | in region |
| 14 | 48710887 | 91743057 Adam7         | in region |
| 14 | 48710887 | 91743057 Adamdec1      | in region |
| 14 | 48710887 | 91743057 Adcy4         | in region |
| 14 | 48710887 | 91743057 Adra1a        | in region |
| 14 | 48710887 | 91743057 Akap11        | in region |
| 14 | 48710887 | 91743057 Ang           | in region |
| 14 | 48710887 | 91743057 Ang2          | in region |
| 14 | 48710887 | 91743057 Ang4          | in region |
| 14 | 48710887 | 91743057 Ap1g2         | in region |
| 14 | 48710887 | 91743057 Apex1         | in region |
| 14 | 48710887 | 91743057 Arhgef40      | in region |
| 14 | 48710887 | 91743057 Arl11         | in region |
| 14 | 48710887 | 91743057 Atp12a        | in region |
| 14 | 48710887 | 91743057 Atp8a2        | in region |
| 14 | 48710887 | 91743057 Bcl2l2        | in region |
| 14 | 48710887 | 91743057 Bin3          | in region |
| 14 | 48710887 | 91743057 Blk           | in region |
| 14 | 48710887 | 91743057 Bmp1          | in region |
| 14 | 48710887 | 91743057 Bnip3l        | in region |
| 14 | 48710887 | 91743057 C1qtnf9       | in region |
| 14 | 48710887 | 91743057 Cab39l        | in region |
| 14 | 48710887 | 91743057 Cbln3         | in region |
| 14 | 48710887 | 91743057 Ccdc122       | in region |
| 14 | 48710887 | 91743057 Ccdc25        | in region |
| 14 | 48710887 | 91743057 Ccnb1ip1      | in region |
| 14 | 48710887 | 91743057 Cdadc1        | in region |
| 14 | 48710887 | 91743057 Cdca2         | in region |
| 14 | 48710887 | 91743057 Cdh24         | in region |
| 14 | 48710887 | 91743057 Cebpe         | in region |
| 14 | 48710887 | 91743057 Cenpj         | in region |
| 14 | 48710887 | 91743057 Chd8          | in region |
| 14 | 48710887 | 91743057 Chmp7         | in region |
| 14 | 48710887 | 91743057 Chrna2        | in region |
| 14 | 48710887 | 91743057 Cideb         | in region |
| 14 | 48710887 | 91743057 Clu           | in region |
| 14 | 48710887 | 91743057 Cma1          | in region |
| 14 | 48710887 | 91743057 Cma2          | in region |
| 14 | 48710887 | 91743057 Cmtm5         | in region |
| 14 | 48710887 | 91743057 Cog3          | in region |
| 14 | 48710887 | 91743057 Cpb2          | in region |
| 14 | 48710887 | 91743057 Cpne6         | in region |
| 14 | 48710887 | 91743057 Cryl1         | in region |
| 14 | 48710887 | 91743057 Ctsb          | in region |
| 14 | 48710887 | 91743057 Ctsg          | in region |
| 14 | 48710887 | 91743057 Cysltr2       | in region |

|    |          |                        |           |
|----|----------|------------------------|-----------|
| 14 | 48710887 | 91743057 D14Ert668e    | in region |
| 14 | 48710887 | 91743057 D830015G02Rik | in region |
| 14 | 48710887 | 91743057 D930020E02Rik | in region |
| 14 | 48710887 | 91743057 Dad1          | in region |
| 14 | 48710887 | 91743057 Dcaf11        | in region |
| 14 | 48710887 | 91743057 Defb30        | in region |
| 14 | 48710887 | 91743057 Defb42        | in region |
| 14 | 48710887 | 91743057 Defb43        | in region |
| 14 | 48710887 | 91743057 Defb47        | in region |
| 14 | 48710887 | 91743057 Defb48        | in region |
| 14 | 48710887 | 91743057 Dgkh          | in region |
| 14 | 48710887 | 91743057 Dh1           | in region |
| 14 | 48710887 | 91743057 Dh2           | in region |
| 14 | 48710887 | 91743057 Dh4           | in region |
| 14 | 48710887 | 91743057 Diap3         | in region |
| 14 | 48710887 | 91743057 Dleu2         | in region |
| 14 | 48710887 | 91743057 Dleu7         | in region |
| 14 | 48710887 | 91743057 Dnajc15       | in region |
| 14 | 48710887 | 91743057 Dock5         | in region |
| 14 | 48710887 | 91743057 Dok2          | in region |
| 14 | 48710887 | 91743057 Dpysl2        | in region |
| 14 | 48710887 | 91743057 Ear11         | in region |
| 14 | 48710887 | 91743057 Ear14         | in region |
| 14 | 48710887 | 91743057 Ear4          | in region |
| 14 | 48710887 | 91743057 Ear5          | in region |
| 14 | 48710887 | 91743057 Ear6          | in region |
| 14 | 48710887 | 91743057 Ear7          | in region |
| 14 | 48710887 | 91743057 Ebf2          | in region |
| 14 | 48710887 | 91743057 Ebpl          | in region |
| 14 | 48710887 | 91743057 Eddm3b        | in region |
| 14 | 48710887 | 91743057 Efha1         | in region |
| 14 | 48710887 | 91743057 Efs           | in region |
| 14 | 48710887 | 91743057 Egr3          | in region |
| 14 | 48710887 | 91743057 Elf1          | in region |
| 14 | 48710887 | 91743057 Elp3          | in region |
| 14 | 48710887 | 91743057 Enox1         | in region |
| 14 | 48710887 | 91743057 Entpd4        | in region |
| 14 | 48710887 | 91743057 Epb4.9        | in region |
| 14 | 48710887 | 91743057 Ephx2         | in region |
| 14 | 48710887 | 91743057 Epsti1        | in region |
| 14 | 48710887 | 91743057 Esco2         | in region |
| 14 | 48710887 | 91743057 Esd           | in region |
| 14 | 48710887 | 91743057 Exoc5         | in region |
| 14 | 48710887 | 91743057 Extl3         | in region |
| 14 | 48710887 | 91743057 F630043A04Rik | in region |
| 14 | 48710887 | 91743057 Fam123a       | in region |
| 14 | 48710887 | 91743057 Fam158a       | in region |
| 14 | 48710887 | 91743057 Fam160b2      | in region |
| 14 | 48710887 | 91743057 Fam167a       | in region |
| 14 | 48710887 | 91743057 Fbxo16        | in region |
| 14 | 48710887 | 91743057 Fdft1         | in region |
| 14 | 48710887 | 91743057 Fgf17         | in region |

|    |          |                        |           |
|----|----------|------------------------|-----------|
| 14 | 48710887 | 91743057 Fgf9          | in region |
| 14 | 48710887 | 91743057 Fitm1         | in region |
| 14 | 48710887 | 91743057 Fndc3a        | in region |
| 14 | 48710887 | 91743057 Fzd3          | in region |
| 14 | 48710887 | 91743057 G630016D24Rik | in region |
| 14 | 48710887 | 91743057 Gata4         | in region |
| 14 | 48710887 | 91743057 Gfra2         | in region |
| 14 | 48710887 | 91743057 Gja3          | in region |
| 14 | 48710887 | 91743057 Gjb2          | in region |
| 14 | 48710887 | 91743057 Gjb6          | in region |
| 14 | 48710887 | 91743057 Gm10094       | in region |
| 14 | 48710887 | 91743057 Gm10845       | in region |
| 14 | 48710887 | 91743057 Gm1587        | in region |
| 14 | 48710887 | 91743057 Gm4902        | in region |
| 14 | 48710887 | 91743057 Gm5088        | in region |
| 14 | 48710887 | 91743057 Gm5142        | in region |
| 14 | 48710887 | 91743057 Gm5464        | in region |
| 14 | 48710887 | 91743057 Gm5465        | in region |
| 14 | 48710887 | 91743057 Gm5622        | in region |
| 14 | 48710887 | 91743057 Gm5800        | in region |
| 14 | 48710887 | 91743057 Gm600         | in region |
| 14 | 48710887 | 91743057 Gm6498        | in region |
| 14 | 48710887 | 91743057 Gm6878        | in region |
| 14 | 48710887 | 91743057 Gm6904        | in region |
| 14 | 48710887 | 91743057 Gm6907        | in region |
| 14 | 48710887 | 91743057 Gm6994        | in region |
| 14 | 48710887 | 91743057 Gm9199        | in region |
| 14 | 48710887 | 91743057 Gmpr2         | in region |
| 14 | 48710887 | 91743057 Gnrh1         | in region |
| 14 | 48710887 | 91743057 Gtf2f2        | in region |
| 14 | 48710887 | 91743057 Gucy1b2       | in region |
| 14 | 48710887 | 91743057 Gulo          | in region |
| 14 | 48710887 | 91743057 Gzmb          | in region |
| 14 | 48710887 | 91743057 Gzmc          | in region |
| 14 | 48710887 | 91743057 Gzmd          | in region |
| 14 | 48710887 | 91743057 Gzme          | in region |
| 14 | 48710887 | 91743057 Gzmf          | in region |
| 14 | 48710887 | 91743057 Gzmg          | in region |
| 14 | 48710887 | 91743057 Gzmn          | in region |
| 14 | 48710887 | 91743057 Haus4         | in region |
| 14 | 48710887 | 91743057 Hmbox1        | in region |
| 14 | 48710887 | 91743057 Hnrnpc        | in region |
| 14 | 48710887 | 91743057 Homez         | in region |
| 14 | 48710887 | 91743057 Hr            | in region |
| 14 | 48710887 | 91743057 Htr2a         | in region |
| 14 | 48710887 | 91743057 Ift88         | in region |
| 14 | 48710887 | 91743057 Il17d         | in region |
| 14 | 48710887 | 91743057 Il25          | in region |
| 14 | 48710887 | 91743057 Ints6         | in region |
| 14 | 48710887 | 91743057 Ints9         | in region |
| 14 | 48710887 | 91743057 Ipo4          | in region |
| 14 | 48710887 | 91743057 Irf9          | in region |

|    |          |                    |           |
|----|----------|--------------------|-----------|
| 14 | 48710887 | 91743057 Itm2b     | in region |
| 14 | 48710887 | 91743057 Jph4      | in region |
| 14 | 48710887 | 91743057 Jub       | in region |
| 14 | 48710887 | 91743057 Kbtbd7    | in region |
| 14 | 48710887 | 91743057 Kcnrg     | in region |
| 14 | 48710887 | 91743057 Kctd4     | in region |
| 14 | 48710887 | 91743057 Kctd9     | in region |
| 14 | 48710887 | 91743057 Khnyn     | in region |
| 14 | 48710887 | 91743057 Kif13b    | in region |
| 14 | 48710887 | 91743057 Klhl33    | in region |
| 14 | 48710887 | 91743057 Kpna3     | in region |
| 14 | 48710887 | 91743057 Lats2     | in region |
| 14 | 48710887 | 91743057 Lcp1      | in region |
| 14 | 48710887 | 91743057 Lect1     | in region |
| 14 | 48710887 | 91743057 Lgi3      | in region |
| 14 | 48710887 | 91743057 Loxl2     | in region |
| 14 | 48710887 | 91743057 Lpar6     | in region |
| 14 | 48710887 | 91743057 Lrch1     | in region |
| 14 | 48710887 | 91743057 Lrp10     | in region |
| 14 | 48710887 | 91743057 Lrrc16b   | in region |
| 14 | 48710887 | 91743057 Lrrc63    | in region |
| 14 | 48710887 | 91743057 Ltb4r1    | in region |
| 14 | 48710887 | 91743057 Ltb4r2    | in region |
| 14 | 48710887 | 91743057 Mcpt-ps1  | in region |
| 14 | 48710887 | 91743057 Mcpt1     | in region |
| 14 | 48710887 | 91743057 Mcpt2     | in region |
| 14 | 48710887 | 91743057 Mcpt4     | in region |
| 14 | 48710887 | 91743057 Mcpt8     | in region |
| 14 | 48710887 | 91743057 Mcpt9     | in region |
| 14 | 48710887 | 91743057 Mdp1      | in region |
| 14 | 48710887 | 91743057 Med4      | in region |
| 14 | 48710887 | 91743057 Mettl17   | in region |
| 14 | 48710887 | 91743057 Mettl3    | in region |
| 14 | 48710887 | 91743057 Mipep     | in region |
| 14 | 48710887 | 91743057 Mir1196   | in region |
| 14 | 48710887 | 91743057 Mir124a-1 | in region |
| 14 | 48710887 | 91743057 Mir15a    | in region |
| 14 | 48710887 | 91743057 Mir16-1   | in region |
| 14 | 48710887 | 91743057 Mir1971   | in region |
| 14 | 48710887 | 91743057 Mir208a   | in region |
| 14 | 48710887 | 91743057 Mir208b   | in region |
| 14 | 48710887 | 91743057 Mir2145-2 | in region |
| 14 | 48710887 | 91743057 Mir3077   | in region |
| 14 | 48710887 | 91743057 Mir3078   | in region |
| 14 | 48710887 | 91743057 Mir320    | in region |
| 14 | 48710887 | 91743057 Mir598    | in region |
| 14 | 48710887 | 91743057 Mir686    | in region |
| 14 | 48710887 | 91743057 Mir687    | in region |
| 14 | 48710887 | 91743057 Mir719    | in region |
| 14 | 48710887 | 91743057 Mir759    | in region |
| 14 | 48710887 | 91743057 Mmp14     | in region |
| 14 | 48710887 | 91743057 Mphosph8  | in region |

|    |          |                   |           |
|----|----------|-------------------|-----------|
| 14 | 48710887 | 91743057 Mrp63    | in region |
| 14 | 48710887 | 91743057 Mrpl52   | in region |
| 14 | 48710887 | 91743057 Msra     | in region |
| 14 | 48710887 | 91743057 Mtmr6    | in region |
| 14 | 48710887 | 91743057 Mtmr9    | in region |
| 14 | 48710887 | 91743057 Mtrf1    | in region |
| 14 | 48710887 | 91743057 Mudeng   | in region |
| 14 | 48710887 | 91743057 Myh6     | in region |
| 14 | 48710887 | 91743057 Myh7     | in region |
| 14 | 48710887 | 91743057 N6amt2   | in region |
| 14 | 48710887 | 91743057 Naa16    | in region |
| 14 | 48710887 | 91743057 Naa30    | in region |
| 14 | 48710887 | 91743057 Ndrq2    | in region |
| 14 | 48710887 | 91743057 Nedd8    | in region |
| 14 | 48710887 | 91743057 Nefl     | in region |
| 14 | 48710887 | 91743057 Nefm     | in region |
| 14 | 48710887 | 91743057 Neil2    | in region |
| 14 | 48710887 | 91743057 Nfatc4   | in region |
| 14 | 48710887 | 91743057 Ngdn     | in region |
| 14 | 48710887 | 91743057 Nkx2-6   | in region |
| 14 | 48710887 | 91743057 Nkx3-1   | in region |
| 14 | 48710887 | 91743057 Npm2     | in region |
| 14 | 48710887 | 91743057 Nrl      | in region |
| 14 | 48710887 | 91743057 Nudt15   | in region |
| 14 | 48710887 | 91743057 Nudt18   | in region |
| 14 | 48710887 | 91743057 Nufip1   | in region |
| 14 | 48710887 | 91743057 Nupl1    | in region |
| 14 | 48710887 | 91743057 Nynrin   | in region |
| 14 | 48710887 | 91743057 Olfm4    | in region |
| 14 | 48710887 | 91743057 Olfr1507 | in region |
| 14 | 48710887 | 91743057 Olfr1508 | in region |
| 14 | 48710887 | 91743057 Olfr1509 | in region |
| 14 | 48710887 | 91743057 Olfr1510 | in region |
| 14 | 48710887 | 91743057 Olfr1511 | in region |
| 14 | 48710887 | 91743057 Olfr1512 | in region |
| 14 | 48710887 | 91743057 Olfr1513 | in region |
| 14 | 48710887 | 91743057 Olfr221  | in region |
| 14 | 48710887 | 91743057 Olfr49   | in region |
| 14 | 48710887 | 91743057 Olfr722  | in region |
| 14 | 48710887 | 91743057 Olfr723  | in region |
| 14 | 48710887 | 91743057 Olfr724  | in region |
| 14 | 48710887 | 91743057 Olfr725  | in region |
| 14 | 48710887 | 91743057 Olfr726  | in region |
| 14 | 48710887 | 91743057 Olfr727  | in region |
| 14 | 48710887 | 91743057 Olfr728  | in region |
| 14 | 48710887 | 91743057 Olfr729  | in region |
| 14 | 48710887 | 91743057 Olfr730  | in region |
| 14 | 48710887 | 91743057 Olfr731  | in region |
| 14 | 48710887 | 91743057 Olfr732  | in region |
| 14 | 48710887 | 91743057 Olfr733  | in region |
| 14 | 48710887 | 91743057 Olfr734  | in region |
| 14 | 48710887 | 91743057 Olfr735  | in region |

|    |          |                  |           |
|----|----------|------------------|-----------|
| 14 | 48710887 | 91743057 Olfr736 | in region |
| 14 | 48710887 | 91743057 Olfr738 | in region |
| 14 | 48710887 | 91743057 Olfr739 | in region |
| 14 | 48710887 | 91743057 Olfr740 | in region |
| 14 | 48710887 | 91743057 Olfr741 | in region |
| 14 | 48710887 | 91743057 Olfr742 | in region |
| 14 | 48710887 | 91743057 Olfr743 | in region |
| 14 | 48710887 | 91743057 Olfr744 | in region |
| 14 | 48710887 | 91743057 Olfr745 | in region |
| 14 | 48710887 | 91743057 Olfr746 | in region |
| 14 | 48710887 | 91743057 Olfr747 | in region |
| 14 | 48710887 | 91743057 Olfr748 | in region |
| 14 | 48710887 | 91743057 Olfr749 | in region |
| 14 | 48710887 | 91743057 Olfr750 | in region |
| 14 | 48710887 | 91743057 Osgep   | in region |
| 14 | 48710887 | 91743057 Otx2    | in region |
| 14 | 48710887 | 91743057 Otx2os1 | in region |
| 14 | 48710887 | 91743057 Oxa1l   | in region |
| 14 | 48710887 | 91743057 Pabpn1  | in region |
| 14 | 48710887 | 91743057 Parp2   | in region |
| 14 | 48710887 | 91743057 Parp4   | in region |
| 14 | 48710887 | 91743057 Pbk     | in region |
| 14 | 48710887 | 91743057 Pcdh17  | in region |
| 14 | 48710887 | 91743057 Pcdh20  | in region |
| 14 | 48710887 | 91743057 Pcdh8   | in region |
| 14 | 48710887 | 91743057 Pck2    | in region |
| 14 | 48710887 | 91743057 Pdlim2  | in region |
| 14 | 48710887 | 91743057 Pebp4   | in region |
| 14 | 48710887 | 91743057 Peli2   | in region |
| 14 | 48710887 | 91743057 Phf11   | in region |
| 14 | 48710887 | 91743057 Phyhip  | in region |
| 14 | 48710887 | 91743057 Pinx1   | in region |
| 14 | 48710887 | 91743057 Piwil2  | in region |
| 14 | 48710887 | 91743057 Pnma2   | in region |
| 14 | 48710887 | 91743057 Pnoc    | in region |
| 14 | 48710887 | 91743057 Pnp     | in region |
| 14 | 48710887 | 91743057 Pnp2    | in region |
| 14 | 48710887 | 91743057 Polr3d  | in region |
| 14 | 48710887 | 91743057 Ppp1r3e | in region |
| 14 | 48710887 | 91743057 Ppp2r2a | in region |
| 14 | 48710887 | 91743057 Ppp3cc  | in region |
| 14 | 48710887 | 91743057 Prmt5   | in region |
| 14 | 48710887 | 91743057 Prss51  | in region |
| 14 | 48710887 | 91743057 Prss52  | in region |
| 14 | 48710887 | 91743057 Prss55  | in region |
| 14 | 48710887 | 91743057 Psmb11  | in region |
| 14 | 48710887 | 91743057 Psmb5   | in region |
| 14 | 48710887 | 91743057 Psme1   | in region |
| 14 | 48710887 | 91743057 Psme2   | in region |
| 14 | 48710887 | 91743057 Pspc1   | in region |
| 14 | 48710887 | 91743057 Ptk2b   | in region |
| 14 | 48710887 | 91743057 R3hcc1  | in region |



|    |          |                   |           |
|----|----------|-------------------|-----------|
| 14 | 48710887 | 91743057 Rab2b    | in region |
| 14 | 48710887 | 91743057 Rabggta  | in region |
| 14 | 48710887 | 91743057 Rb1      | in region |
| 14 | 48710887 | 91743057 Rcbtb1   | in region |
| 14 | 48710887 | 91743057 Rcbtb2   | in region |
| 14 | 48710887 | 91743057 Rec8     | in region |
| 14 | 48710887 | 91743057 Reep4    | in region |
| 14 | 48710887 | 91743057 Rem2     | in region |
| 14 | 48710887 | 91743057 Rhobtb2  | in region |
| 14 | 48710887 | 91743057 Ripk3    | in region |
| 14 | 48710887 | 91743057 Rnase1   | in region |
| 14 | 48710887 | 91743057 Rnase10  | in region |
| 14 | 48710887 | 91743057 Rnase11  | in region |
| 14 | 48710887 | 91743057 Rnase12  | in region |
| 14 | 48710887 | 91743057 Rnase13  | in region |
| 14 | 48710887 | 91743057 Rnase4   | in region |
| 14 | 48710887 | 91743057 Rnase6   | in region |
| 14 | 48710887 | 91743057 Rnase9   | in region |
| 14 | 48710887 | 91743057 Rnaseh2b | in region |
| 14 | 48710887 | 91743057 Rnf17    | in region |
| 14 | 48710887 | 91743057 Rnf31    | in region |
| 14 | 48710887 | 91743057 Rp111    | in region |
| 14 | 48710887 | 91743057 Rpgr1p1  | in region |
| 14 | 48710887 | 91743057 Rpph1    | in region |
| 14 | 48710887 | 91743057 Sacs     | in region |
| 14 | 48710887 | 91743057 Sall2    | in region |
| 14 | 48710887 | 91743057 Sap18    | in region |
| 14 | 48710887 | 91743057 Scara3   | in region |
| 14 | 48710887 | 91743057 Scara5   | in region |
| 14 | 48710887 | 91743057 Sdr39u1  | in region |
| 14 | 48710887 | 91743057 Serp2    | in region |
| 14 | 48710887 | 91743057 Serpine3 | in region |
| 14 | 48710887 | 91743057 Setdb2   | in region |
| 14 | 48710887 | 91743057 Sftpc    | in region |
| 14 | 48710887 | 91743057 Sgcg     | in region |
| 14 | 48710887 | 91743057 Shisa2   | in region |
| 14 | 48710887 | 91743057 Siah3    | in region |
| 14 | 48710887 | 91743057 Slc22a17 | in region |
| 14 | 48710887 | 91743057 Slc25a30 | in region |
| 14 | 48710887 | 91743057 Slc25a37 | in region |
| 14 | 48710887 | 91743057 Slc35f4  | in region |
| 14 | 48710887 | 91743057 Slc39a14 | in region |
| 14 | 48710887 | 91743057 Slc39a2  | in region |
| 14 | 48710887 | 91743057 Slc7a7   | in region |
| 14 | 48710887 | 91743057 Slc7a8   | in region |
| 14 | 48710887 | 91743057 Snora31  | in region |
| 14 | 48710887 | 91743057 Snord8   | in region |
| 14 | 48710887 | 91743057 Sorbs3   | in region |
| 14 | 48710887 | 91743057 Sox7     | in region |
| 14 | 48710887 | 91743057 Spata13  | in region |
| 14 | 48710887 | 91743057 Spert    | in region |
| 14 | 48710887 | 91743057 Stc1     | in region |

|    |          |                        |                         |
|----|----------|------------------------|-------------------------|
| 14 | 48710887 | 91743057 Stmn4         | in region               |
| 14 | 48710887 | 91743057 Sucla2        | in region               |
| 14 | 48710887 | 91743057 Sugt1         | in region               |
| 14 | 48710887 | 91743057 Supt16h       | in region               |
| 14 | 48710887 | 91743057 Tdh           | in region               |
| 14 | 48710887 | 91743057 Tdrd3         | in region               |
| 14 | 48710887 | 91743057 Tep1          | in region               |
| 14 | 48710887 | 91743057 Tgm1          | in region               |
| 14 | 48710887 | 91743057 Thtpa         | in region               |
| 14 | 48710887 | 91743057 Tinf2         | in region               |
| 14 | 48710887 | 91743057 Tlr11         | in region               |
| 14 | 48710887 | 91743057 Tm9sf1        | in region               |
| 14 | 48710887 | 91743057 Tmem55b       | in region               |
| 14 | 48710887 | 91743057 Tnfrsf10b     | in region               |
| 14 | 48710887 | 91743057 Tnfrsf19      | in region               |
| 14 | 48710887 | 91743057 Tnfsf11       | in region               |
| 14 | 48710887 | 91743057 Tox4          | in region               |
| 14 | 48710887 | 91743057 Tppp2         | in region               |
| 14 | 48710887 | 91743057 Tpt1          | in region               |
| 14 | 48710887 | 91743057 Tpt1p         | in region               |
| 14 | 48710887 | 91743057 Trim13        | in region               |
| 14 | 48710887 | 91743057 Trim35        | in region               |
| 14 | 48710887 | 91743057 Tsc22d1       | in region               |
| 14 | 48710887 | 91743057 Tssk4         | in region               |
| 14 | 48710887 | 91743057 Ttc5          | in region               |
| 14 | 48710887 | 91743057 Vmn2r88       | in region               |
| 14 | 48710887 | 91743057 Vmn2r89       | in region               |
| 14 | 48710887 | 91743057 Wbp4          | in region               |
| 14 | 48710887 | 91743057 Wdfy2         | in region               |
| 14 | 48710887 | 91743057 Xkr6          | in region               |
| 14 | 48710887 | 91743057 Xpo4          | in region               |
| 14 | 48710887 | 91743057 Xpo7          | in region               |
| 14 | 48710887 | 91743057 Zc3h13        | in region               |
| 14 | 48710887 | 91743057 Zdhhc20       | in region               |
| 14 | 48710887 | 91743057 Zfhx2         | in region               |
| 14 | 48710887 | 91743057 Zfhx2as       | in region               |
| 14 | 48710887 | 91743057 Zfp219        | in region               |
| 14 | 48710887 | 91743057 Zfp395        | in region               |
| 14 | 48710887 | 91743057 Zfp957        | in region               |
| 14 | 48710887 | 91743057 Zmym2         | in region               |
| 14 | 48710887 | 91743057 Zmym5         | in region               |
| 14 | 49876951 | 49884609 1700011H14Rik | closest upstream gene   |
| 14 | 49876951 | 49884609 Slc35f4       | closest downstream gene |
| 14 | 50504942 | 50541768 Olfr722       | in region               |
| 14 | 51095711 | 51103619 Olfr741       | in region               |
| 14 | 51796151 | 51805973 Ear5          | closest upstream gene   |
| 14 | 51796151 | 51805973 Ang2          | closest downstream gene |
| 14 | 67473516 | 67477324 Dpysl2        | in region               |
| 14 | 83703655 | 83720238 Olfm4         | closest upstream gene   |
| 14 | 83703655 | 83720238 Pcdh17        | closest downstream gene |
| 14 | 91747487 | 91750146 Gm5088        | closest upstream gene   |
| 14 | 91747487 | 91750146 Pcdh9         | closest downstream gene |

|    |          |                         |           |
|----|----------|-------------------------|-----------|
| 14 | 91752257 | 125164197_1700108J01Rik | in region |
| 14 | 91752257 | 125164197_1700110M21Rik | in region |
| 14 | 91752257 | 125164197_4921530L21Rik | in region |
| 14 | 91752257 | 125164197_6720463M24Rik | in region |
| 14 | 91752257 | 125164197_A2ld1         | in region |
| 14 | 91752257 | 125164197_A330035P11Rik | in region |
| 14 | 91752257 | 125164197_Abcc4         | in region |
| 14 | 91752257 | 125164197_Cldn10        | in region |
| 14 | 91752257 | 125164197_Cln5          | in region |
| 14 | 91752257 | 125164197_Clybl         | in region |
| 14 | 91752257 | 125164197_Commd6        | in region |
| 14 | 91752257 | 125164197_D130009I18Rik | in region |
| 14 | 91752257 | 125164197_Dach1         | in region |
| 14 | 91752257 | 125164197_Dct           | in region |
| 14 | 91752257 | 125164197_Dis3          | in region |
| 14 | 91752257 | 125164197_Dnajc3        | in region |
| 14 | 91752257 | 125164197_Dock9         | in region |
| 14 | 91752257 | 125164197_Dzip1         | in region |
| 14 | 91752257 | 125164197_Ednrb         | in region |
| 14 | 91752257 | 125164197_Farp1         | in region |
| 14 | 91752257 | 125164197_Fbxl3         | in region |
| 14 | 91752257 | 125164197_Fgf14         | in region |
| 14 | 91752257 | 125164197_Gm5089        | in region |
| 14 | 91752257 | 125164197_Gm9376        | in region |
| 14 | 91752257 | 125164197_Gpc5          | in region |
| 14 | 91752257 | 125164197_Gpc6          | in region |
| 14 | 91752257 | 125164197_Gpr18         | in region |
| 14 | 91752257 | 125164197_Gpr180        | in region |
| 14 | 91752257 | 125164197_Gpr183        | in region |
| 14 | 91752257 | 125164197_Hs6st3        | in region |
| 14 | 91752257 | 125164197_Ipo5          | in region |
| 14 | 91752257 | 125164197_Irg1          | in region |
| 14 | 91752257 | 125164197_Itgb1         | in region |
| 14 | 91752257 | 125164197_Kctd12        | in region |
| 14 | 91752257 | 125164197_Klf12         | in region |
| 14 | 91752257 | 125164197_Klf5          | in region |
| 14 | 91752257 | 125164197_Klhl1         | in region |
| 14 | 91752257 | 125164197_Lmo7          | in region |
| 14 | 91752257 | 125164197_Mbnl2         | in region |
| 14 | 91752257 | 125164197_Mir17         | in region |
| 14 | 91752257 | 125164197_Mir17hg       | in region |
| 14 | 91752257 | 125164197_Mir18         | in region |
| 14 | 91752257 | 125164197_Mir19a        | in region |
| 14 | 91752257 | 125164197_Mir19b-1      | in region |
| 14 | 91752257 | 125164197_Mir20a        | in region |
| 14 | 91752257 | 125164197_Mir92-1       | in region |
| 14 | 91752257 | 125164197_Mycbp2        | in region |
| 14 | 91752257 | 125164197_Mzt1          | in region |
| 14 | 91752257 | 125164197_Nalcn         | in region |
| 14 | 91752257 | 125164197_Ndfip2        | in region |
| 14 | 91752257 | 125164197_Oxgr1         | in region |
| 14 | 91752257 | 125164197_Pcca          | in region |

|    |           |                         |                         |
|----|-----------|-------------------------|-------------------------|
| 14 | 91752257  | 125164197 Pcdh9         | in region               |
| 14 | 91752257  | 125164197 Pibf1         | in region               |
| 14 | 91752257  | 125164197 Pou4f1        | in region               |
| 14 | 91752257  | 125164197 Rap2a         | in region               |
| 14 | 91752257  | 125164197 Rbm26         | in region               |
| 14 | 91752257  | 125164197 Rnf219        | in region               |
| 14 | 91752257  | 125164197 Scel          | in region               |
| 14 | 91752257  | 125164197 Slain1        | in region               |
| 14 | 91752257  | 125164197 Slc15a1       | in region               |
| 14 | 91752257  | 125164197 Slitrk1       | in region               |
| 14 | 91752257  | 125164197 Slitrk5       | in region               |
| 14 | 91752257  | 125164197 Slitrk6       | in region               |
| 14 | 91752257  | 125164197 Sox21         | in region               |
| 14 | 91752257  | 125164197 Spry2         | in region               |
| 14 | 91752257  | 125164197 Stk24         | in region               |
| 14 | 91752257  | 125164197 Tbc1d4        | in region               |
| 14 | 91752257  | 125164197 Tgds          | in region               |
| 14 | 91752257  | 125164197 Timm8a2       | in region               |
| 14 | 91752257  | 125164197 Tm9sf2        | in region               |
| 14 | 91752257  | 125164197 Tmtc4         | in region               |
| 14 | 91752257  | 125164197 Trim52        | in region               |
| 14 | 91752257  | 125164197 Ubac2         | in region               |
| 14 | 91752257  | 125164197 Uchl3         | in region               |
| 14 | 91752257  | 125164197 Ugg2          | in region               |
| 14 | 91752257  | 125164197 Zic2          | in region               |
| 14 | 91752257  | 125164197 Zic5          | in region               |
| 14 | 91806479  | 91825034 Gm5088         | closest upstream gene   |
| 14 | 91806479  | 91825034 Pcdh9          | closest downstream gene |
| 14 | 97348612  | 97360390 Khlh1          | closest upstream gene   |
| 14 | 97348612  | 97360390 Dach1          | closest downstream gene |
| 14 | 100989808 | 101077282 Klf12         | closest upstream gene   |
| 14 | 100989808 | 101077282 1700110M21Rik | closest downstream gene |
| 14 | 112380613 | 112393301 Slitrk5       | closest upstream gene   |
| 14 | 112380613 | 112393301 Mir17         | closest downstream gene |
| 14 | 115705068 | 115718226 Gpc5          | in region               |
| 15 | 5862853   | 5899664 Ptger4          | closest upstream gene   |
| 15 | 5862853   | 5899664 Dab2            | closest downstream gene |
| 15 | 5862853   | 5899664 Ptger4          | closest upstream gene   |
| 15 | 5862853   | 5899664 Dab2            | closest downstream gene |
| 15 | 8179090   | 8196127 2410089E03Rik   | in region               |
| 15 | 8179090   | 8196127 2410089E03Rik   | in region               |
| 15 | 17085294  | 17183454 Cdh9           | closest upstream gene   |
| 15 | 17085294  | 17183454 Cdh10          | closest downstream gene |
| 15 | 17085294  | 17183454 Cdh9           | closest upstream gene   |
| 15 | 17085294  | 17183454 Cdh10          | closest downstream gene |
| 15 | 23313757  | 23320897 Cdh18          | in region               |
| 15 | 77361635  | 77377491 Apol7c         | in region               |
| 15 | 82078165  | 82084585 Cenpm          | closest upstream gene   |
| 15 | 82078165  | 82084585 1500009C09Rik  | closest downstream gene |
| 15 | 82078165  | 82084585 Cenpm          | closest upstream gene   |
| 15 | 82078165  | 82084585 1500009C09Rik  | closest downstream gene |
| 15 | 91435990  | 91814167 Lrrk2          | in region               |

|    |           |                        |                         |
|----|-----------|------------------------|-------------------------|
| 15 | 91435990  | 91814167 Muc19         | in region               |
| 15 | 91435990  | 91814167 Smgc          | in region               |
| 15 | 97054411  | 97059801 Slc38a4       | closest upstream gene   |
| 15 | 97054411  | 97059801 Amigo2        | closest downstream gene |
| 15 | 102164397 | 102168247 Myg1         | in region               |
| 15 | 102164397 | 102168247 Myg1         | in region               |
| 15 | 103350843 | 103361294 Pde1b        | in region               |
| 15 | 103350843 | 103361294 Ppp1r1a      | in region               |
| 16 | 3900257   | 3903680 Nat15          | in region               |
| 16 | 3900257   | 3903680 Nat15          | in region               |
| 16 | 23106664  | 23107650 Eif4a2        | in region               |
| 16 | 23106664  | 23107650 Eif4a2        | in region               |
| 16 | 36302510  | 36315222 Stfa1         | closest upstream gene   |
| 16 | 36302510  | 36315222 BC117090      | closest downstream gene |
| 16 | 39938420  | 39958737 Igsf11        | closest upstream gene   |
| 16 | 39938420  | 39958737 Lsamp         | closest downstream gene |
| 16 | 60038245  | 60044212 Epha6         | in region               |
| 16 | 60038245  | 60044212 Epha6         | in region               |
| 16 | 69328034  | 69360721 Cadm2         | closest upstream gene   |
| 16 | 69328034  | 69360721 Speer2        | closest downstream gene |
| 16 | 69328034  | 69360721 Cadm2         | closest upstream gene   |
| 16 | 69328034  | 69360721 Speer2        | closest downstream gene |
| 16 | 71160098  | 71177690 Gbe1          | closest upstream gene   |
| 16 | 71160098  | 71177690 Robo1         | closest downstream gene |
| 16 | 71160098  | 71177690 Gbe1          | closest upstream gene   |
| 16 | 71160098  | 71177690 Robo1         | closest downstream gene |
| 16 | 80025549  | 80041276 Tmprss15      | closest upstream gene   |
| 16 | 80025549  | 80041276 Ncam2         | closest downstream gene |
| 16 | 93624926  | 93643686 Cbr1          | closest upstream gene   |
| 16 | 93624926  | 93643686 Cbr3          | closest downstream gene |
| 17 | 7718573   | 7754779 Gm9992         | closest upstream gene   |
| 17 | 7718573   | 7754779 Fn timer       | closest downstream gene |
| 17 | 16690392  | 16706105 Rgmb          | closest upstream gene   |
| 17 | 16690392  | 16706105 Zfp960        | closest downstream gene |
| 17 | 64982415  | 64989415 Man2a1        | in region               |
| 17 | 85317079  | 85336104 Lrpprc        | closest upstream gene   |
| 17 | 85317079  | 85336104 1110020A21Rik | closest downstream gene |
| 17 | 92814088  | 92827843 Nr xn1        | closest upstream gene   |
| 17 | 92814088  | 92827843 Adcyap1       | closest downstream gene |
| 18 | 15720851  | 15725610 Chst9         | in region               |
| 18 | 31429451  | 31437437 Rit2          | in region               |
| 18 | 31944845  | 31950834 Polr2d        | in region               |
| 18 | 42541779  | 42547122 Rbm27         | closest upstream gene   |
| 18 | 42541779  | 42547122 Pou4f3        | closest downstream gene |
| 18 | 66305569  | 66345963 Ccbe1         | in region               |
| 18 | 67405794  | 67410138 Mppe1         | closest upstream gene   |
| 18 | 67405794  | 67410138 Impa2         | closest downstream gene |
| 18 | 75161929  | 75167219 BC031181      | in region               |
| 18 | 75161929  | 75167219 Rpl17         | in region               |
| 18 | 79218018  | 79224490 Setbp1        | in region               |
| 19 | 3272976   | 11244072 1110014N23Rik | in region               |
| 19 | 3272976   | 11244072 1700017D01Rik | in region               |

|    |         |                        |           |
|----|---------|------------------------|-----------|
| 19 | 3272976 | 11244072 1700019N12Rik | in region |
| 19 | 3272976 | 11244072 1700020D05Rik | in region |
| 19 | 3272976 | 11244072 1700025F22Rik | in region |
| 19 | 3272976 | 11244072 1700092M07Rik | in region |
| 19 | 3272976 | 11244072 1700123I01Rik | in region |
| 19 | 3272976 | 11244072 1810006K21Rik | in region |
| 19 | 3272976 | 11244072 1810009A15Rik | in region |
| 19 | 3272976 | 11244072 1810055G02Rik | in region |
| 19 | 3272976 | 11244072 2010003K11Rik | in region |
| 19 | 3272976 | 11244072 2700081O15Rik | in region |
| 19 | 3272976 | 11244072 4930481A15Rik | in region |
| 19 | 3272976 | 11244072 4930579J09Rik | in region |
| 19 | 3272976 | 11244072 5730408K05Rik | in region |
| 19 | 3272976 | 11244072 A430093F15Rik | in region |
| 19 | 3272976 | 11244072 AB056442      | in region |
| 19 | 3272976 | 11244072 AI462493      | in region |
| 19 | 3272976 | 11244072 AI837181      | in region |
| 19 | 3272976 | 11244072 AI846148      | in region |
| 19 | 3272976 | 11244072 AW112010      | in region |
| 19 | 3272976 | 11244072 Actn3         | in region |
| 19 | 3272976 | 11244072 Acy3          | in region |
| 19 | 3272976 | 11244072 Adrbk1        | in region |
| 19 | 3272976 | 11244072 Ahnak         | in region |
| 19 | 3272976 | 11244072 Aip           | in region |
| 19 | 3272976 | 11244072 Aldh3b1       | in region |
| 19 | 3272976 | 11244072 Aldh3b2       | in region |
| 19 | 3272976 | 11244072 Ankrd13d      | in region |
| 19 | 3272976 | 11244072 Arl2          | in region |
| 19 | 3272976 | 11244072 Asrgl1        | in region |
| 19 | 3272976 | 11244072 Atg2a         | in region |
| 19 | 3272976 | 11244072 Atl3          | in region |
| 19 | 3272976 | 11244072 B3gat3        | in region |
| 19 | 3272976 | 11244072 B3gnt1        | in region |
| 19 | 3272976 | 11244072 BC014805      | in region |
| 19 | 3272976 | 11244072 BC021614      | in region |
| 19 | 3272976 | 11244072 BC048609      | in region |
| 19 | 3272976 | 11244072 Bad           | in region |
| 19 | 3272976 | 11244072 Banf1         | in region |
| 19 | 3272976 | 11244072 Batf2         | in region |
| 19 | 3272976 | 11244072 Bbs1          | in region |
| 19 | 3272976 | 11244072 Best1         | in region |
| 19 | 3272976 | 11244072 Brms1         | in region |
| 19 | 3272976 | 11244072 Bscl2         | in region |
| 19 | 3272976 | 11244072 C730048C13Rik | in region |
| 19 | 3272976 | 11244072 Cabp2         | in region |
| 19 | 3272976 | 11244072 Cabp4         | in region |
| 19 | 3272976 | 11244072 Capn1         | in region |
| 19 | 3272976 | 11244072 Carns1        | in region |
| 19 | 3272976 | 11244072 Catsper1      | in region |
| 19 | 3272976 | 11244072 Ccdc85b       | in region |
| 19 | 3272976 | 11244072 Ccdc86        | in region |
| 19 | 3272976 | 11244072 Ccdc87        | in region |

|    |         |                        |           |
|----|---------|------------------------|-----------|
| 19 | 3272976 | 11244072 Ccdc88b       | in region |
| 19 | 3272976 | 11244072 Ccs           | in region |
| 19 | 3272976 | 11244072 Cd248         | in region |
| 19 | 3272976 | 11244072 Cd5           | in region |
| 19 | 3272976 | 11244072 Cd6           | in region |
| 19 | 3272976 | 11244072 Cdc42bpg      | in region |
| 19 | 3272976 | 11244072 Cdc42ep2      | in region |
| 19 | 3272976 | 11244072 Cdca5         | in region |
| 19 | 3272976 | 11244072 Cdk2ap2       | in region |
| 19 | 3272976 | 11244072 Cfl1          | in region |
| 19 | 3272976 | 11244072 Chka          | in region |
| 19 | 3272976 | 11244072 Chrm1         | in region |
| 19 | 3272976 | 11244072 Clcf1         | in region |
| 19 | 3272976 | 11244072 Cnih2         | in region |
| 19 | 3272976 | 11244072 Coro1b        | in region |
| 19 | 3272976 | 11244072 Cox8a         | in region |
| 19 | 3272976 | 11244072 Cpsf7         | in region |
| 19 | 3272976 | 11244072 Cpt1a         | in region |
| 19 | 3272976 | 11244072 Cst6          | in region |
| 19 | 3272976 | 11244072 Ctsf          | in region |
| 19 | 3272976 | 11244072 Ctsw          | in region |
| 19 | 3272976 | 11244072 Cybasc3       | in region |
| 19 | 3272976 | 11244072 D330050I16Rik | in region |
| 19 | 3272976 | 11244072 D630002G06Rik | in region |
| 19 | 3272976 | 11244072 Dagla         | in region |
| 19 | 3272976 | 11244072 Dak           | in region |
| 19 | 3272976 | 11244072 Ddb1          | in region |
| 19 | 3272976 | 11244072 Dnajc4        | in region |
| 19 | 3272976 | 11244072 Doc2g         | in region |
| 19 | 3272976 | 11244072 Dpf2          | in region |
| 19 | 3272976 | 11244072 Dpp3          | in region |
| 19 | 3272976 | 11244072 Drap1         | in region |
| 19 | 3272976 | 11244072 Eef1g         | in region |
| 19 | 3272976 | 11244072 Efemp2        | in region |
| 19 | 3272976 | 11244072 Ehbp111       | in region |
| 19 | 3272976 | 11244072 Ehd1          | in region |
| 19 | 3272976 | 11244072 Eif1ad        | in region |
| 19 | 3272976 | 11244072 Eml3          | in region |
| 19 | 3272976 | 11244072 Esrra         | in region |
| 19 | 3272976 | 11244072 Fads1         | in region |
| 19 | 3272976 | 11244072 Fads2         | in region |
| 19 | 3272976 | 11244072 Fads3         | in region |
| 19 | 3272976 | 11244072 Fam89b        | in region |
| 19 | 3272976 | 11244072 Fau           | in region |
| 19 | 3272976 | 11244072 Fen1          | in region |
| 19 | 3272976 | 11244072 Fermt3        | in region |
| 19 | 3272976 | 11244072 Fibp          | in region |
| 19 | 3272976 | 11244072 Fkbp2         | in region |
| 19 | 3272976 | 11244072 Firt1         | in region |
| 19 | 3272976 | 11244072 Fosl1         | in region |
| 19 | 3272976 | 11244072 Frmd8         | in region |
| 19 | 3272976 | 11244072 Fth1          | in region |

|    |         |                   |           |
|----|---------|-------------------|-----------|
| 19 | 3272976 | 11244072 Gal      | in region |
| 19 | 3272976 | 11244072 Gal3st3  | in region |
| 19 | 3272976 | 11244072 Ganab    | in region |
| 19 | 3272976 | 11244072 Gm2518   | in region |
| 19 | 3272976 | 11244072 Gm5631   | in region |
| 19 | 3272976 | 11244072 Gm962    | in region |
| 19 | 3272976 | 11244072 Gm98     | in region |
| 19 | 3272976 | 11244072 Gng3     | in region |
| 19 | 3272976 | 11244072 Gpha2    | in region |
| 19 | 3272976 | 11244072 Gpr137   | in region |
| 19 | 3272976 | 11244072 Gpr152   | in region |
| 19 | 3272976 | 11244072 Gpr44    | in region |
| 19 | 3272976 | 11244072 Gstp1    | in region |
| 19 | 3272976 | 11244072 Gstp2    | in region |
| 19 | 3272976 | 11244072 Hnrnpul2 | in region |
| 19 | 3272976 | 11244072 Hrasls5  | in region |
| 19 | 3272976 | 11244072 Ighmbp2  | in region |
| 19 | 3272976 | 11244072 Incenp   | in region |
| 19 | 3272976 | 11244072 Ints5    | in region |
| 19 | 3272976 | 11244072 Kat5     | in region |
| 19 | 3272976 | 11244072 Kcnk4    | in region |
| 19 | 3272976 | 11244072 Kcnk7    | in region |
| 19 | 3272976 | 11244072 Kdm2a    | in region |
| 19 | 3272976 | 11244072 Klc2     | in region |
| 19 | 3272976 | 11244072 Lgals12  | in region |
| 19 | 3272976 | 11244072 Lrfn4    | in region |
| 19 | 3272976 | 11244072 Lrp5     | in region |
| 19 | 3272976 | 11244072 Lrrc10b  | in region |
| 19 | 3272976 | 11244072 Lrrn4cl  | in region |
| 19 | 3272976 | 11244072 Ltbp3    | in region |
| 19 | 3272976 | 11244072 Macrod1  | in region |
| 19 | 3272976 | 11244072 Malat1   | in region |
| 19 | 3272976 | 11244072 Map3k11  | in region |
| 19 | 3272976 | 11244072 Map4k2   | in region |
| 19 | 3272976 | 11244072 Mark2    | in region |
| 19 | 3272976 | 11244072 Men1     | in region |
| 19 | 3272976 | 11244072 Mir192   | in region |
| 19 | 3272976 | 11244072 Mir194-2 | in region |
| 19 | 3272976 | 11244072 Mrpl11   | in region |
| 19 | 3272976 | 11244072 Mrpl21   | in region |
| 19 | 3272976 | 11244072 Mrpl49   | in region |
| 19 | 3272976 | 11244072 Ms4a10   | in region |
| 19 | 3272976 | 11244072 Ms4a13   | in region |
| 19 | 3272976 | 11244072 Ms4a15   | in region |
| 19 | 3272976 | 11244072 Ms4a8a   | in region |
| 19 | 3272976 | 11244072 Mta2     | in region |
| 19 | 3272976 | 11244072 Mtl5     | in region |
| 19 | 3272976 | 11244072 Mus81    | in region |
| 19 | 3272976 | 11244072 Naa40    | in region |
| 19 | 3272976 | 11244072 Naaladl1 | in region |
| 19 | 3272976 | 11244072 Ndufs8   | in region |
| 19 | 3272976 | 11244072 Ndufv1   | in region |



|    |         |                   |           |
|----|---------|-------------------|-----------|
| 19 | 3272976 | 11244072 Neat1    | in region |
| 19 | 3272976 | 11244072 Npas4    | in region |
| 19 | 3272976 | 11244072 Nrxa2    | in region |
| 19 | 3272976 | 11244072 Nudt22   | in region |
| 19 | 3272976 | 11244072 Nudt8    | in region |
| 19 | 3272976 | 11244072 Nxf1     | in region |
| 19 | 3272976 | 11244072 Otub1    | in region |
| 19 | 3272976 | 11244072 Ovol1    | in region |
| 19 | 3272976 | 11244072 Pacs1    | in region |
| 19 | 3272976 | 11244072 Pcnx13   | in region |
| 19 | 3272976 | 11244072 Pcx      | in region |
| 19 | 3272976 | 11244072 Peli3    | in region |
| 19 | 3272976 | 11244072 Pga5     | in region |
| 19 | 3272976 | 11244072 Pitpnm1  | in region |
| 19 | 3272976 | 11244072 Pla2g16  | in region |
| 19 | 3272976 | 11244072 Plcb3    | in region |
| 19 | 3272976 | 11244072 Pola2    | in region |
| 19 | 3272976 | 11244072 Pold4    | in region |
| 19 | 3272976 | 11244072 Polr2g   | in region |
| 19 | 3272976 | 11244072 Ppp1ca   | in region |
| 19 | 3272976 | 11244072 Ppp1r14b | in region |
| 19 | 3272976 | 11244072 Ppp2r5b  | in region |
| 19 | 3272976 | 11244072 Ppp6r3   | in region |
| 19 | 3272976 | 11244072 Prdx5    | in region |
| 19 | 3272976 | 11244072 Prpf19   | in region |
| 19 | 3272976 | 11244072 Ptprcap  | in region |
| 19 | 3272976 | 11244072 Pygm     | in region |
| 19 | 3272976 | 11244072 Rab1b    | in region |
| 19 | 3272976 | 11244072 Rab3il1  | in region |
| 19 | 3272976 | 11244072 Rad9     | in region |
| 19 | 3272976 | 11244072 Rasgrp2  | in region |
| 19 | 3272976 | 11244072 Rbm14    | in region |
| 19 | 3272976 | 11244072 Rbm4     | in region |
| 19 | 3272976 | 11244072 Rbm4b    | in region |
| 19 | 3272976 | 11244072 Rce1     | in region |
| 19 | 3272976 | 11244072 Rcor2    | in region |
| 19 | 3272976 | 11244072 Rela     | in region |
| 19 | 3272976 | 11244072 Rhod     | in region |
| 19 | 3272976 | 11244072 Rin1     | in region |
| 19 | 3272976 | 11244072 Rnaseh2c | in region |
| 19 | 3272976 | 11244072 Rom1     | in region |
| 19 | 3272976 | 11244072 Rps6ka4  | in region |
| 19 | 3272976 | 11244072 Rps6kb2  | in region |
| 19 | 3272976 | 11244072 Rtn3     | in region |
| 19 | 3272976 | 11244072 Sac3d1   | in region |
| 19 | 3272976 | 11244072 Sart1    | in region |
| 19 | 3272976 | 11244072 Scgb1a1  | in region |
| 19 | 3272976 | 11244072 Scyl1    | in region |
| 19 | 3272976 | 11244072 Sdhaf2   | in region |
| 19 | 3272976 | 11244072 Sf1      | in region |
| 19 | 3272976 | 11244072 Sf3b2    | in region |
| 19 | 3272976 | 11244072 Sipa1    | in region |

|    |         |                    |           |
|----|---------|--------------------|-----------|
| 19 | 3272976 | 11244072 Slc15a3   | in region |
| 19 | 3272976 | 11244072 Slc22a12  | in region |
| 19 | 3272976 | 11244072 Slc22a19  | in region |
| 19 | 3272976 | 11244072 Slc22a20  | in region |
| 19 | 3272976 | 11244072 Slc22a6   | in region |
| 19 | 3272976 | 11244072 Slc22a8   | in region |
| 19 | 3272976 | 11244072 Slc25a45  | in region |
| 19 | 3272976 | 11244072 Slc29a2   | in region |
| 19 | 3272976 | 11244072 Slc3a2    | in region |
| 19 | 3272976 | 11244072 Snhg1     | in region |
| 19 | 3272976 | 11244072 Snord22   | in region |
| 19 | 3272976 | 11244072 Snx15     | in region |
| 19 | 3272976 | 11244072 Snx32     | in region |
| 19 | 3272976 | 11244072 Spnb3     | in region |
| 19 | 3272976 | 11244072 Ssh3      | in region |
| 19 | 3272976 | 11244072 Sssca1    | in region |
| 19 | 3272976 | 11244072 Stip1     | in region |
| 19 | 3272976 | 11244072 Stx5a     | in region |
| 19 | 3272976 | 11244072 Suv420h1  | in region |
| 19 | 3272976 | 11244072 Syt12     | in region |
| 19 | 3272976 | 11244072 Syt7      | in region |
| 19 | 3272976 | 11244072 Syvn1     | in region |
| 19 | 3272976 | 11244072 Taf6l     | in region |
| 19 | 3272976 | 11244072 Tbc1d10c  | in region |
| 19 | 3272976 | 11244072 Tbx10     | in region |
| 19 | 3272976 | 11244072 Tcirg1    | in region |
| 19 | 3272976 | 11244072 Tigd3     | in region |
| 19 | 3272976 | 11244072 Tm7sf2    | in region |
| 19 | 3272976 | 11244072 Tmem109   | in region |
| 19 | 3272976 | 11244072 Tmem132a  | in region |
| 19 | 3272976 | 11244072 Tmem134   | in region |
| 19 | 3272976 | 11244072 Tmem138   | in region |
| 19 | 3272976 | 11244072 Tmem151a  | in region |
| 19 | 3272976 | 11244072 Tmem179b  | in region |
| 19 | 3272976 | 11244072 Tmem216   | in region |
| 19 | 3272976 | 11244072 Tmem223   | in region |
| 19 | 3272976 | 11244072 Trmt112   | in region |
| 19 | 3272976 | 11244072 Trpt1     | in region |
| 19 | 3272976 | 11244072 Ttc9c     | in region |
| 19 | 3272976 | 11244072 Tut1      | in region |
| 19 | 3272976 | 11244072 Ubxn1     | in region |
| 19 | 3272976 | 11244072 Unc93b1   | in region |
| 19 | 3272976 | 11244072 Vegfb     | in region |
| 19 | 3272976 | 11244072 Vps37c    | in region |
| 19 | 3272976 | 11244072 Vwce      | in region |
| 19 | 3272976 | 11244072 Wdr74     | in region |
| 19 | 3272976 | 11244072 Yif1a     | in region |
| 19 | 3272976 | 11244072 Zbtb3     | in region |
| 19 | 3272976 | 11244072 Zdhhc24   | in region |
| 19 | 3272976 | 11244072 Zfpl1     | in region |
| 19 | 3272976 | 11244072 Znhit2-ps | in region |
| 19 | 3272976 | 11244072 Zp1       | in region |

|    |          |                        |           |
|----|----------|------------------------|-----------|
| 19 | 11280786 | 16049394 A330040F15Rik | in region |
| 19 | 11280786 | 16049394 Cep78         | in region |
| 19 | 11280786 | 16049394 Cntf          | in region |
| 19 | 11280786 | 16049394 Dtx4          | in region |
| 19 | 11280786 | 16049394 Fam111a       | in region |
| 19 | 11280786 | 16049394 Gif           | in region |
| 19 | 11280786 | 16049394 Glyat         | in region |
| 19 | 11280786 | 16049394 Gm4952        | in region |
| 19 | 11280786 | 16049394 Gm8369        | in region |
| 19 | 11280786 | 16049394 Gm97          | in region |
| 19 | 11280786 | 16049394 Keg1          | in region |
| 19 | 11280786 | 16049394 Lpxn          | in region |
| 19 | 11280786 | 16049394 Mpeg1         | in region |
| 19 | 11280786 | 16049394 Mrpl16        | in region |
| 19 | 11280786 | 16049394 Ms4a1         | in region |
| 19 | 11280786 | 16049394 Ms4a2         | in region |
| 19 | 11280786 | 16049394 Ms4a3         | in region |
| 19 | 11280786 | 16049394 Ms4a4b        | in region |
| 19 | 11280786 | 16049394 Ms4a4c        | in region |
| 19 | 11280786 | 16049394 Ms4a4d        | in region |
| 19 | 11280786 | 16049394 Ms4a5         | in region |
| 19 | 11280786 | 16049394 Ms4a6b        | in region |
| 19 | 11280786 | 16049394 Ms4a6c        | in region |
| 19 | 11280786 | 16049394 Ms4a6d        | in region |
| 19 | 11280786 | 16049394 Ms4a7         | in region |
| 19 | 11280786 | 16049394 Olfr1417      | in region |
| 19 | 11280786 | 16049394 Olfr1418      | in region |
| 19 | 11280786 | 16049394 Olfr1419      | in region |
| 19 | 11280786 | 16049394 Olfr1420      | in region |
| 19 | 11280786 | 16049394 Olfr1423      | in region |
| 19 | 11280786 | 16049394 Olfr1424      | in region |
| 19 | 11280786 | 16049394 Olfr1425      | in region |
| 19 | 11280786 | 16049394 Olfr1426      | in region |
| 19 | 11280786 | 16049394 Olfr1427      | in region |
| 19 | 11280786 | 16049394 Olfr1428      | in region |
| 19 | 11280786 | 16049394 Olfr1431      | in region |
| 19 | 11280786 | 16049394 Olfr1433      | in region |
| 19 | 11280786 | 16049394 Olfr1434      | in region |
| 19 | 11280786 | 16049394 Olfr1436      | in region |
| 19 | 11280786 | 16049394 Olfr1437      | in region |
| 19 | 11280786 | 16049394 Olfr1440      | in region |
| 19 | 11280786 | 16049394 Olfr1441      | in region |
| 19 | 11280786 | 16049394 Olfr1442      | in region |
| 19 | 11280786 | 16049394 Olfr1443      | in region |
| 19 | 11280786 | 16049394 Olfr1444      | in region |
| 19 | 11280786 | 16049394 Olfr1445      | in region |
| 19 | 11280786 | 16049394 Olfr1446      | in region |
| 19 | 11280786 | 16049394 Olfr1447      | in region |
| 19 | 11280786 | 16049394 Olfr1448      | in region |
| 19 | 11280786 | 16049394 Olfr1449      | in region |
| 19 | 11280786 | 16049394 Olfr1450      | in region |
| 19 | 11280786 | 16049394 Olfr1451      | in region |

|    |          |                        |           |
|----|----------|------------------------|-----------|
| 19 | 11280786 | 16049394 Olfr1453      | in region |
| 19 | 11280786 | 16049394 Olfr1454      | in region |
| 19 | 11280786 | 16049394 Olfr1457      | in region |
| 19 | 11280786 | 16049394 Olfr1459      | in region |
| 19 | 11280786 | 16049394 Olfr1461      | in region |
| 19 | 11280786 | 16049394 Olfr1462      | in region |
| 19 | 11280786 | 16049394 Olfr1463      | in region |
| 19 | 11280786 | 16049394 Olfr1465      | in region |
| 19 | 11280786 | 16049394 Olfr1466      | in region |
| 19 | 11280786 | 16049394 Olfr1467      | in region |
| 19 | 11280786 | 16049394 Olfr1469      | in region |
| 19 | 11280786 | 16049394 Olfr1471      | in region |
| 19 | 11280786 | 16049394 Olfr1472      | in region |
| 19 | 11280786 | 16049394 Olfr1474      | in region |
| 19 | 11280786 | 16049394 Olfr1475      | in region |
| 19 | 11280786 | 16049394 Olfr1477      | in region |
| 19 | 11280786 | 16049394 Olfr1480      | in region |
| 19 | 11280786 | 16049394 Olfr1484      | in region |
| 19 | 11280786 | 16049394 Olfr1487      | in region |
| 19 | 11280786 | 16049394 Olfr1489      | in region |
| 19 | 11280786 | 16049394 Olfr1490      | in region |
| 19 | 11280786 | 16049394 Olfr1491      | in region |
| 19 | 11280786 | 16049394 Olfr1494      | in region |
| 19 | 11280786 | 16049394 Olfr1495      | in region |
| 19 | 11280786 | 16049394 Olfr1496      | in region |
| 19 | 11280786 | 16049394 Olfr1497      | in region |
| 19 | 11280786 | 16049394 Olfr1499      | in region |
| 19 | 11280786 | 16049394 Olfr1500      | in region |
| 19 | 11280786 | 16049394 Olfr1501      | in region |
| 19 | 11280786 | 16049394 Olfr1502      | in region |
| 19 | 11280786 | 16049394 Olfr1504      | in region |
| 19 | 11280786 | 16049394 Olfr1505      | in region |
| 19 | 11280786 | 16049394 Olfr235       | in region |
| 19 | 11280786 | 16049394 Olfr262       | in region |
| 19 | 11280786 | 16049394 Olfr76        | in region |
| 19 | 11280786 | 16049394 Oosp1         | in region |
| 19 | 11280786 | 16049394 Osbp          | in region |
| 19 | 11280786 | 16049394 Patl1         | in region |
| 19 | 11280786 | 16049394 Pfpl          | in region |
| 19 | 11280786 | 16049394 Plac1l        | in region |
| 19 | 11280786 | 16049394 Psat1         | in region |
| 19 | 11280786 | 16049394 Stx3          | in region |
| 19 | 11280786 | 16049394 Tle4          | in region |
| 19 | 11280786 | 16049394 U05342        | in region |
| 19 | 11280786 | 16049394 Zfp91         | in region |
| 19 | 18689360 | 25974568 1110059E24Rik | in region |
| 19 | 18689360 | 25974568 1700028P14Rik | in region |
| 19 | 18689360 | 25974568 2410127L17Rik | in region |
| 19 | 18689360 | 25974568 Aldh1a1       | in region |
| 19 | 18689360 | 25974568 Aldh1a7       | in region |
| 19 | 18689360 | 25974568 Anxa1         | in region |
| 19 | 18689360 | 25974568 Apba1         | in region |

|    |          |                        |                         |
|----|----------|------------------------|-------------------------|
| 19 | 18689360 | 25974568 BC016495      | in region               |
| 19 | 18689360 | 25974568 Cbwd1         | in region               |
| 19 | 18689360 | 25974568 D030056L22Rik | in region               |
| 19 | 18689360 | 25974568 Dmrt1         | in region               |
| 19 | 18689360 | 25974568 Dmrt2         | in region               |
| 19 | 18689360 | 25974568 Dmrt3         | in region               |
| 19 | 18689360 | 25974568 Dock8         | in region               |
| 19 | 18689360 | 25974568 E030003E18Rik | in region               |
| 19 | 18689360 | 25974568 E030010A14Rik | in region               |
| 19 | 18689360 | 25974568 Fam108b       | in region               |
| 19 | 18689360 | 25974568 Fam122a       | in region               |
| 19 | 18689360 | 25974568 Fam189a2      | in region               |
| 19 | 18689360 | 25974568 Foxd4         | in region               |
| 19 | 18689360 | 25974568 Fxn           | in region               |
| 19 | 18689360 | 25974568 Gda           | in region               |
| 19 | 18689360 | 25974568 Kank1         | in region               |
| 19 | 18689360 | 25974568 Klf9          | in region               |
| 19 | 18689360 | 25974568 Mamdc2        | in region               |
| 19 | 18689360 | 25974568 Mir1192       | in region               |
| 19 | 18689360 | 25974568 Mir204        | in region               |
| 19 | 18689360 | 25974568 Ostf1         | in region               |
| 19 | 18689360 | 25974568 Pgm5          | in region               |
| 19 | 18689360 | 25974568 Pip5k1b       | in region               |
| 19 | 18689360 | 25974568 Ptar1         | in region               |
| 19 | 18689360 | 25974568 Rorb          | in region               |
| 19 | 18689360 | 25974568 Smc5          | in region               |
| 19 | 18689360 | 25974568 Tjp2          | in region               |
| 19 | 18689360 | 25974568 Tmc1          | in region               |
| 19 | 18689360 | 25974568 Tmem2         | in region               |
| 19 | 18689360 | 25974568 Trpm3         | in region               |
| 19 | 18689360 | 25974568 Trpm6         | in region               |
| 19 | 18689360 | 25974568 Zfand5        | in region               |
| 19 | 26040768 | 27757257 C030016D13Rik | in region               |
| 19 | 26040768 | 27757257 D19Bwg1357e   | in region               |
| 19 | 26040768 | 27757257 Gm815         | in region               |
| 19 | 26040768 | 27757257 Kcnv2         | in region               |
| 19 | 26040768 | 27757257 Smarca2       | in region               |
| 19 | 26040768 | 27757257 Vldlr         | in region               |
| 19 | 38148017 | 38153709 Cep55         | in region               |
| 19 | 38589204 | 38598536 Tmem20        | closest upstream gene   |
| 19 | 38589204 | 38598536 Plce1         | closest downstream gene |
| 19 | 44435088 | 44443084 Scd4          | closest upstream gene   |
| 19 | 44435088 | 44443084 Scd1          | closest downstream gene |
| 19 | 46477513 | 46532944 Sufu          | in region               |
| 19 | 54645268 | 57419690 9930023K05Rik | in region               |
| 19 | 54645268 | 57419690 A630007B06Rik | in region               |
| 19 | 54645268 | 57419690 Ablim1        | in region               |
| 19 | 54645268 | 57419690 Acsl5         | in region               |
| 19 | 54645268 | 57419690 Adrb1         | in region               |
| 19 | 54645268 | 57419690 Afap1l2       | in region               |
| 19 | 54645268 | 57419690 Casp7         | in region               |
| 19 | 54645268 | 57419690 Dclre1a       | in region               |

|    |           |                         |                         |
|----|-----------|-------------------------|-------------------------|
| 19 | 54645268  | 57419690 Gpam           | in region               |
| 19 | 54645268  | 57419690 Gucy2g         | in region               |
| 19 | 54645268  | 57419690 Habp2          | in region               |
| 19 | 54645268  | 57419690 Nhlrc2         | in region               |
| 19 | 54645268  | 57419690 Nrap           | in region               |
| 19 | 54645268  | 57419690 Tcf7l2         | in region               |
| 19 | 54645268  | 57419690 Tdrd1          | in region               |
| 19 | 54645268  | 57419690 Tectb          | in region               |
| 19 | 54645268  | 57419690 Vti1a          | in region               |
| 19 | 54645268  | 57419690 Vwa2           | in region               |
| 19 | 54645268  | 57419690 Zdhhc6         | in region               |
| 19 | 55617636  | 55625830 Vti1a          | in region               |
| X  | 120137949 | 120158626 Nap1l3        | closest upstream gene   |
| X  | 120137949 | 120158626 3110007F17Rik | closest downstream gene |
| X  | 120377370 | 121084372 3110007F17Rik | closest upstream gene   |
| X  | 120377370 | 121084372 Vmn2r121      | closest downstream gene |
| Y  | 27        | 37653 Zfy1              | closest downstream gene |
| Y  | 27        | 37029 Zfy1              | closest downstream gene |
| Y  | 49697     | 627575 Ddx3y            | in region               |
| Y  | 49697     | 627575 Eif2s3y          | in region               |
| Y  | 49697     | 627575 Kdm5d            | in region               |
| Y  | 49697     | 627575 Tspy-ps          | in region               |
| Y  | 49697     | 627575 Ube1y1           | in region               |
| Y  | 49697     | 627575 Uty              | in region               |
| Y  | 49697     | 627575 Zfy1             | in region               |
| Y  | 628670    | 629367 Ddx3y            | closest upstream gene   |
| Y  | 628670    | 629367 Usp9y            | closest downstream gene |
| Y  | 628670    | 629367 Ddx3y            | closest upstream gene   |
| Y  | 628670    | 629367 Usp9y            | closest downstream gene |
| Y  | 629548    | 641515 Usp9y            | in region               |
| Y  | 642954    | 697432 Usp9y            | in region               |
| Y  | 700853    | 796066 Usp9y            | in region               |
| Y  | 799215    | 801874 Usp9y            | closest upstream gene   |
| Y  | 799215    | 801874 Zfy2             | closest downstream gene |
| Y  | 1680828   | 1755358 Zfy2            | closest upstream gene   |
| Y  | 1680828   | 1755358 Gm6026          | closest downstream gene |
| Y  | 1759926   | 1827232 Zfy2            | closest upstream gene   |
| Y  | 1759926   | 1827232 Gm6026          | closest downstream gene |
| Y  | 1781425   | 1809242 Zfy2            | closest upstream gene   |
| Y  | 1781425   | 1809242 Gm6026          | closest downstream gene |
| Y  | 1822884   | 1827232 Zfy2            | closest upstream gene   |
| Y  | 1822884   | 1827232 Gm6026          | closest downstream gene |
| Y  | 1851347   | 1918061 Gm6026          | in region               |
| Y  | 1851347   | 2148556 Gm16501         | in region               |
| Y  | 1851347   | 2148556 Gm6026          | in region               |
| Y  | 1851347   | 2148556 Sry             | in region               |
| Y  | 1919670   | 2000358 Gm16501         | in region               |
| Y  | 2003497   | 2148556 Gm16501         | closest upstream gene   |
| Y  | 2003497   | 2148556 Rbmy1a1         | closest downstream gene |

| Gene start | Gene stop | Gain/Loss | RED (1) = copy gain<br>BLUE (-1) = copy loss |      |     |     |
|------------|-----------|-----------|----------------------------------------------|------|-----|-----|
|            |           |           | Myc                                          | NeuT | Ras | Src |
| 36849033   | 36996372  | gain      |                                              | 1    |     |     |
| 37276105   | 37320229  | gain      |                                              | 1    |     |     |
| 40862445   | 40912112  | gain      |                                              | 1    |     |     |
| 42705044   | 42751670  | gain      |                                              | 1    |     |     |
| 66765816   | 66864169  | gain      |                                              | 1    |     |     |
| 88704763   | 88705687  | loss      | -1                                           |      |     |     |
| 88736825   | 88737752  | loss      | -1                                           |      |     |     |
| 154839305  | 154876748 | loss      | -1                                           |      |     |     |
| 29850217   | 29912126  | loss      |                                              | -1   |     |     |
| 30495994   | 30498792  | loss      |                                              | -1   |     |     |
| 34459302   | 34576915  | loss      |                                              |      |     | -1  |
| 35653059   | 35755198  | loss      |                                              |      |     | -1  |
| 38785861   | 38910905  | loss      |                                              |      |     | -1  |
| 40439688   | 40508662  | loss      |                                              |      |     | -1  |
| 94282752   | 94296115  | gain      |                                              | 1    |     |     |
| 94247257   | 94252630  | gain      |                                              | 1    |     |     |
| 94268906   | 94277513  | gain      |                                              | 1    |     |     |
| 94304601   | 94386624  | gain      |                                              | 1    |     |     |
| 104257905  | 104315779 | loss      | -1                                           |      |     |     |
| 144615449  | 144638009 | gain      | 1                                            |      |     |     |
| 144615449  | 144638009 | loss      |                                              |      |     | -1  |
| 3099229    | 3100150   | loss      | -1                                           |      |     |     |
| 3642110    | 3643953   | loss      | -1                                           |      |     |     |
| 3866034    | 3870672   | loss      | -1                                           |      |     |     |
| 5571325    | 5727091   | loss      | -1                                           |      |     |     |
| 4691500    | 4720453   | loss      | -1                                           |      |     |     |
| 3605267    | 3718759   | loss      | -1                                           |      |     |     |
| 3797804    | 3799252   | loss      | -1                                           |      |     |     |
| 4060682    | 4065592   | loss      | -1                                           |      |     |     |
| 3828304    | 3865552   | loss      | -1                                           |      |     |     |
| 3761619    | 3762747   | loss      | -1                                           |      |     |     |
| 3923088    | 3946810   | loss      | -1                                           |      |     |     |
| 3983812    | 4004661   | loss      | -1                                           |      |     |     |
| 3502025    | 3543770   | loss      | -1                                           |      |     |     |
| 3476187    | 3501915   | loss      | -1                                           |      |     |     |
| 6192758    | 6202778   | loss      | -1                                           |      |     |     |
| 6292826    | 6323269   | loss      | -1                                           |      |     |     |
| 6118251    | 6146935   | loss      | -1                                           |      |     |     |
| 9697731    | 9750558   | loss      | -1                                           |      |     |     |
| 9548056    | 9596309   | loss      | -1                                           |      |     |     |
| 8068639    | 8166188   | loss      | -1                                           |      |     |     |
| 8618067    | 8793956   | loss      | -1                                           |      |     |     |
| 9196463    | 9378838   | loss      | -1                                           |      |     |     |
| 6323353    | 6381418   | loss      | -1                                           |      |     |     |
| 8462790    | 8534849   | loss      | -1                                           |      |     |     |
| 6614532    | 6917870   | loss      | -1                                           |      |     |     |
| 8068639    | 8166188   | gain      |                                              | 1    |     |     |
| 9843111    | 9844544   | gain      |                                              | 1    |     |     |
| 10801644   | 10826570  | gain      |                                              | 1    |     |     |

|           |                |
|-----------|----------------|
| 15924267  | 15941024 gain  |
| 16050521  | 16090645 gain  |
| 17780628  | 18045881 gain  |
| 25175732  | 25208968 loss  |
| 25536479  | 25727150 loss  |
| 28740294  | 28894649 gain  |
| 49597377  | 49610742 gain  |
| 52609145  | 52625035 gain  |
| 48552817  | 48574792 gain  |
| 53274227  | 53283104 gain  |
| 53043660  | 53172767 gain  |
| 49456403  | 49463981 gain  |
| 49392716  | 49421023 gain  |
| 49548866  | 49562355 gain  |
| 49502289  | 49519430 gain  |
| 51229549  | 51242800 gain  |
| 49072333  | 49353133 gain  |
| 48206202  | 48292461 gain  |
| 53727053  | 53776143 gain  |
| 53644342  | 53719881 gain  |
| 49678097  | 49857953 gain  |
| 48292673  | 48444825 gain  |
| 49525468  | 49533955 gain  |
| 48676385  | 48686364 gain  |
| 53002155  | 53013726 gain  |
| 53024795  | 53034931 gain  |
| 52983500  | 52984439 gain  |
| 52923704  | 52924664 gain  |
| 52868429  | 52869383 gain  |
| 52838270  | 52839230 gain  |
| 49691618  | 49694855 gain  |
| 49644931  | 49669758 gain  |
| 53453284  | 53635350 gain  |
| 52452120  | 52501131 gain  |
| 53792576  | 53799757 gain  |
| 48443827  | 48486294 gain  |
| 48598064  | 48676003 gain  |
| 53838916  | 53874890 gain  |
| 49534088  | 49544417 gain  |
| 89354888  | 89361457 loss  |
| 89885510  | 89892378 loss  |
| 98603355  | 98787606 loss  |
| 98860837  | 98926478 loss  |
| 100449283 | 100676353 loss |
| 110070395 | 111330115 loss |
| 111087610 | 111132903 loss |
| 111754074 | 111840681 loss |
| 112286356 | 112320445 loss |
| 112383434 | 112447466 loss |
| 112477220 | 112959578 loss |
| 113150495 | 113672108 loss |
| 114079328 | 114287703 loss |

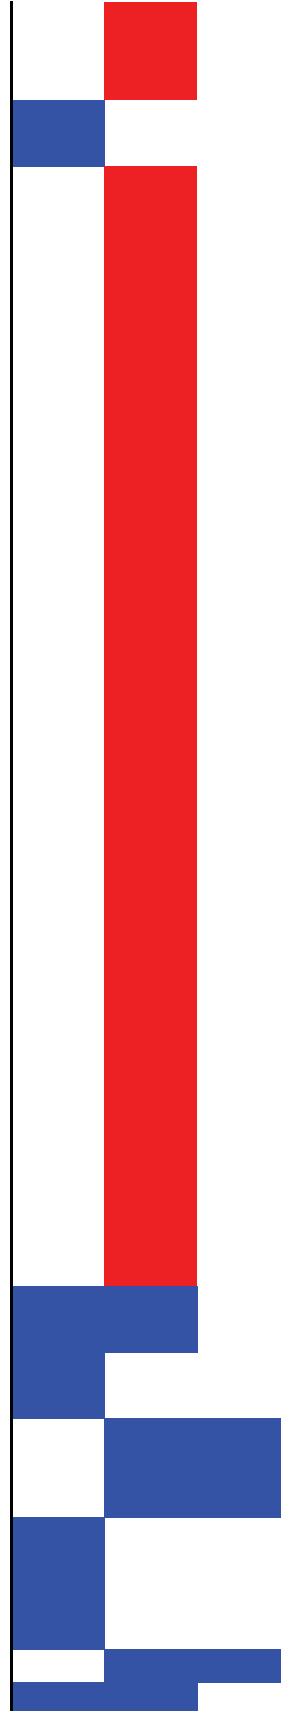



|           |                |
|-----------|----------------|
| 113835988 | 113917633 loss |
| 124526728 | 124527974 loss |
| 115809332 | 115817221 loss |
| 115845976 | 115846902 loss |
| 118199879 | 118202822 loss |
| 115410677 | 115449932 loss |
| 118877659 | 118890822 loss |
| 115452438 | 115453639 loss |
| 122366501 | 122382378 loss |
| 124614291 | 124621905 loss |
| 119202922 | 119211374 loss |
| 118897742 | 118905329 loss |
| 123412437 | 123427542 loss |
| 116309114 | 116324256 loss |
| 117598766 | 117602368 loss |
| 117556934 | 117559934 loss |
| 115457589 | 115484896 loss |
| 117545623 | 117556074 loss |
| 123389952 | 123395404 loss |
| 122989892 | 123020046 loss |
| 122782407 | 122803334 loss |
| 116791822 | 116798330 loss |
| 116262337 | 116270235 loss |
| 122536470 | 122563124 loss |
| 116381534 | 116387709 loss |
| 116269334 | 116272871 loss |
| 118868129 | 118873903 loss |
| 117541866 | 117545075 loss |
| 118996443 | 119088126 loss |
| 118105505 | 118109948 loss |
| 124595708 | 124614161 loss |
| 120339167 | 120340425 loss |
| 118928073 | 118932460 loss |
| 114633217 | 114659833 loss |
| 120712170 | 120727930 loss |
| 120212472 | 120242881 loss |
| 115190891 | 115206254 loss |
| 114971650 | 115005420 loss |
| 115084228 | 115111639 loss |
| 115158804 | 115168746 loss |
| 114914688 | 114927162 loss |
| 115125208 | 115143667 loss |
| 115236321 | 115251619 loss |
| 115273542 | 115294971 loss |
| 115297332 | 115320310 loss |
| 114781286 | 114806582 loss |
| 118299008 | 118304520 loss |
| 123080843 | 123089154 loss |
| 120593806 | 120597610 loss |
| 117347290 | 117354830 loss |
| 115587723 | 115612531 loss |
| 124732582 | 124742901 loss |

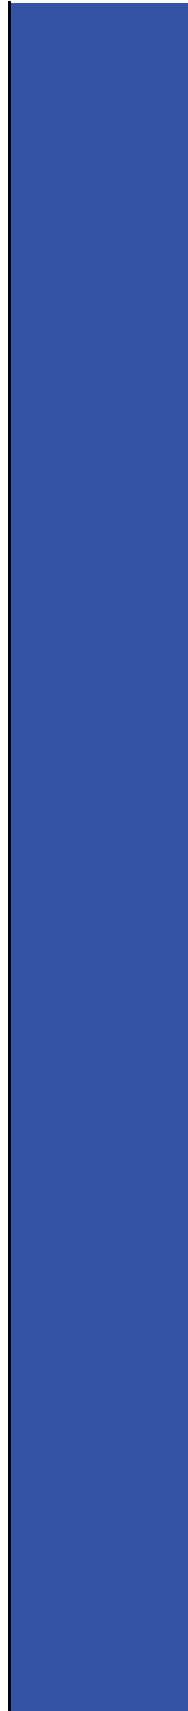

|           |                |
|-----------|----------------|
| 117561247 | 117564608 loss |
| 118293403 | 118300381 loss |
| 119834028 | 119839965 loss |
| 116692012 | 116745865 loss |
| 118102305 | 118105521 loss |
| 124559028 | 124563752 loss |
| 117223098 | 117346886 loss |
| 118848061 | 118862616 loss |
| 115669260 | 115690507 loss |
| 124377942 | 124385855 loss |
| 119212292 | 119301724 loss |
| 119939682 | 119959866 loss |
| 115254642 | 115255732 loss |
| 121087339 | 121095704 loss |
| 121286608 | 121294730 loss |
| 120988920 | 120997522 loss |
| 116887794 | 116924522 loss |
| 120261349 | 120282277 loss |
| 124707257 | 124732626 loss |
| 116230331 | 116266487 loss |
| 119310336 | 119312070 loss |
| 119329207 | 119331550 loss |
| 116667952 | 116677882 loss |
| 122910798 | 122927113 loss |
| 119487282 | 119808016 loss |
| 122860746 | 122871942 loss |
| 116492511 | 116494113 loss |
| 118032618 | 118035349 loss |
| 124419121 | 124478755 loss |
| 117567097 | 117587604 loss |
| 116180153 | 116210840 loss |
| 120370077 | 120419781 loss |
| 117814647 | 117852648 loss |
| 116832240 | 116855229 loss |
| 117429263 | 117438271 loss |
| 115557004 | 115560569 loss |
| 118634571 | 118641515 loss |
| 118905519 | 118921582 loss |
| 115748069 | 115769648 loss |
| 123026875 | 123361603 loss |
| 124532482 | 124539415 loss |
| 115979366 | 116136788 loss |
| 124762390 | 124787133 loss |
| 118081941 | 118088387 loss |
| 122624093 | 122638431 loss |
| 120442138 | 120442227 loss |
| 120445210 | 120445302 loss |
| 124408937 | 124409046 loss |
| 124421024 | 124421133 loss |
| 115511850 | 115551853 loss |
| 116375038 | 116380990 loss |
| 115500696 | 115508788 loss |



|           |                |
|-----------|----------------|
| 118115021 | 118130100 loss |
| 124479792 | 124527044 loss |
| 116480338 | 116492036 loss |
| 123582255 | 123589493 loss |
| 122673341 | 122679723 loss |
| 116273656 | 116300556 loss |
| 123389952 | 123395429 loss |
| 120430039 | 120504180 loss |
| 115704374 | 115726481 loss |
| 122878795 | 122893450 loss |
| 118606503 | 118607445 loss |
| 118589128 | 118590070 loss |
| 118565689 | 118566637 loss |
| 118541387 | 118542341 loss |
| 118502089 | 118503043 loss |
| 118481459 | 118482467 loss |
| 118454240 | 118455188 loss |
| 118426199 | 118427141 loss |
| 118407135 | 118408083 loss |
| 118398853 | 118399801 loss |
| 118382013 | 118382952 loss |
| 118362107 | 118363055 loss |
| 118338123 | 118339071 loss |
| 122999117 | 123000877 loss |
| 122793490 | 122795243 loss |
| 122960153 | 122976076 loss |
| 114761312 | 114766499 loss |
| 115894518 | 115975661 loss |
| 116801259 | 116806557 loss |
| 115823122 | 115832449 loss |
| 124334888 | 124337899 loss |
| 119091137 | 119095025 loss |
| 122804367 | 122817184 loss |
| 118983917 | 118993128 loss |
| 122513469 | 122536418 loss |
| 116358203 | 116372605 loss |
| 116768960 | 116787436 loss |
| 117880817 | 117964002 loss |
| 115769559 | 115796294 loss |
| 123465117 | 123507147 loss |
| 119137890 | 119165203 loss |
| 120550473 | 120564165 loss |
| 120817977 | 120861139 loss |
| 116944068 | 117169520 loss |
| 116826440 | 116828737 loss |
| 123594675 | 123614240 loss |
| 124663673 | 124686343 loss |
| 120077885 | 120202804 loss |
| 124392104 | 124409666 loss |
| 118781349 | 118809934 loss |
| 117507862 | 117541910 loss |
| 120204835 | 120209266 loss |



|           |                |
|-----------|----------------|
| 120640921 | 120689852 loss |
| 124743936 | 124751287 loss |
| 116827120 | 116827179 loss |
| 116828375 | 116828453 loss |
| 117604757 | 117807495 loss |
| 114672722 | 114715803 loss |
| 118035349 | 118081868 loss |
| 114732131 | 114744360 loss |
| 116799417 | 116801335 loss |
| 116393559 | 116476853 loss |
| 118143795 | 118162454 loss |
| 120778255 | 120781831 loss |
| 118213545 | 118216331 loss |
| 116924593 | 116941185 loss |
| 116224132 | 116228548 loss |
| 116476607 | 116480164 loss |
| 122693839 | 122732177 loss |
| 115834485 | 115840203 loss |
| 115739569 | 115747675 loss |
| 116662821 | 116666980 loss |
| 124356007 | 124370798 loss |
| 118227300 | 118293010 loss |
| 118949931 | 118967118 loss |
| 124528002 | 124532486 loss |
| 124795657 | 124805125 loss |
| 120602741 | 120624306 loss |
| 118842122 | 118846461 loss |
| 120731842 | 120770848 loss |
| 119095288 | 119126504 loss |
| 116550006 | 116661710 loss |
| 118996443 | 119088126 loss |
| 124419121 | 124478755 loss |
| 124479792 | 124527044 loss |
| 128867038 | 128896851 loss |
| 128867038 | 128896851 loss |
| 135242371 | 135264095 loss |
| 135242371 | 135264095 loss |
| 135559284 | 135577564 loss |
| 135605862 | 135609286 loss |
| 136166351 | 136169128 loss |
| 135762279 | 135802488 loss |
| 135728308 | 135751971 loss |
| 136209524 | 136391850 loss |
| 135866890 | 135896593 loss |
| 135979438 | 136000317 loss |
| 135699736 | 135701307 loss |
| 136106447 | 136158638 loss |
| 136025675 | 136105233 loss |
| 135605862 | 135609286 loss |
| 135803871 | 135830814 loss |
| 135841983 | 135849857 loss |
| 137024717 | 137126545 loss |

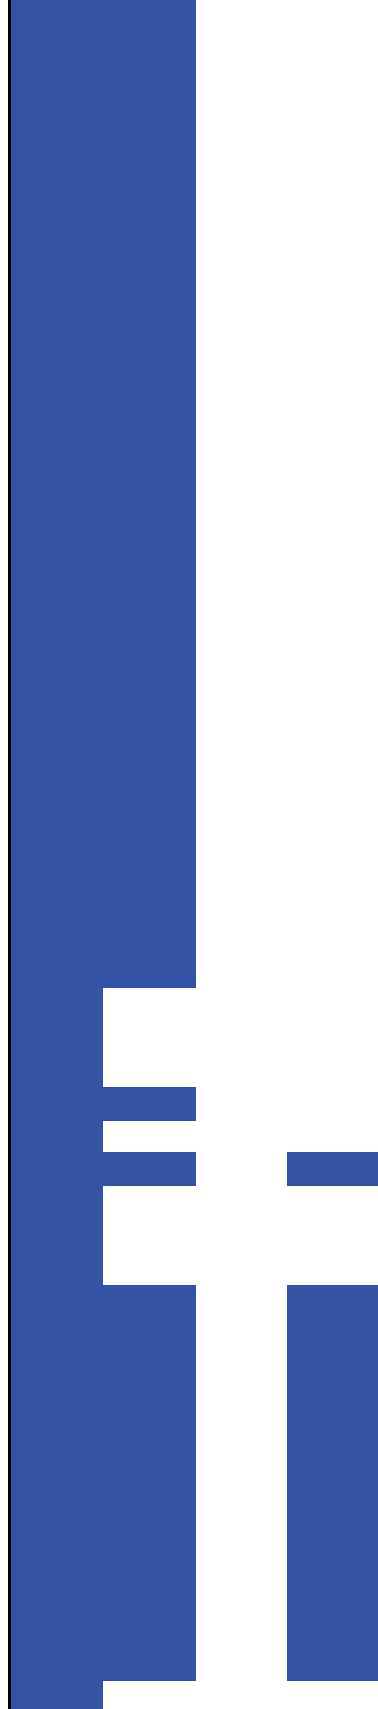

|           |           |      |
|-----------|-----------|------|
| 138331649 | 138338058 | loss |
| 140368895 | 140401693 | loss |
| 140341283 | 140366563 | loss |
| 140368895 | 140401693 | loss |
| 140341283 | 140366563 | loss |
| 140622426 | 140634260 | loss |
| 140622426 | 140634260 | loss |
| 140857154 | 140885293 | loss |
| 144008093 | 144028675 | gain |
| 144043673 | 144053659 | gain |
| 144483039 | 144517548 | loss |
| 144802270 | 144836773 | loss |
| 144858878 | 144905050 | loss |
| 144565039 | 144780495 | loss |
| 147315003 | 147321423 | loss |
| 147472545 | 147504807 | loss |
| 147451169 | 147462173 | loss |
| 147380592 | 147412876 | loss |
| 147526908 | 147533704 | loss |
| 147519824 | 147526034 | loss |
| 147514598 | 147519805 | loss |
| 147247703 | 147278928 | loss |
| 147415297 | 147433671 | loss |
| 147374854 | 147376176 | loss |
| 147359897 | 147361314 | loss |
| 147283861 | 147310885 | loss |
| 147869388 | 147874571 | loss |
| 147822690 | 147931794 | loss |
| 153652578 | 153674004 | loss |
| 154243693 | 154269639 | loss |
| 65361313  | 65433140  | loss |
| 65522469  | 65559381  | loss |
| 65361313  | 65433140  | gain |
| 65522469  | 65559381  | gain |
| 105242186 | 105289087 | loss |
| 105364075 | 105411736 | loss |
| 105242186 | 105289087 | loss |
| 105364075 | 105411736 | loss |
| 48454337  | 48484831  | gain |
| 148180951 | 148392874 | gain |
| 148719205 | 148779989 | gain |
| 149257935 | 149284185 | gain |
| 149090118 | 149099692 | gain |
| 149106098 | 149137234 | gain |
| 149357407 | 149507379 | gain |
| 148936590 | 149050202 | gain |
| 148869580 | 148894954 | gain |
| 97014657  | 97052139  | gain |
| 97372387  | 97413942  | gain |
| 97574821  | 97577174  | gain |
| 97591290  | 97596229  | gain |
| 98239295  | 99597599  | gain |

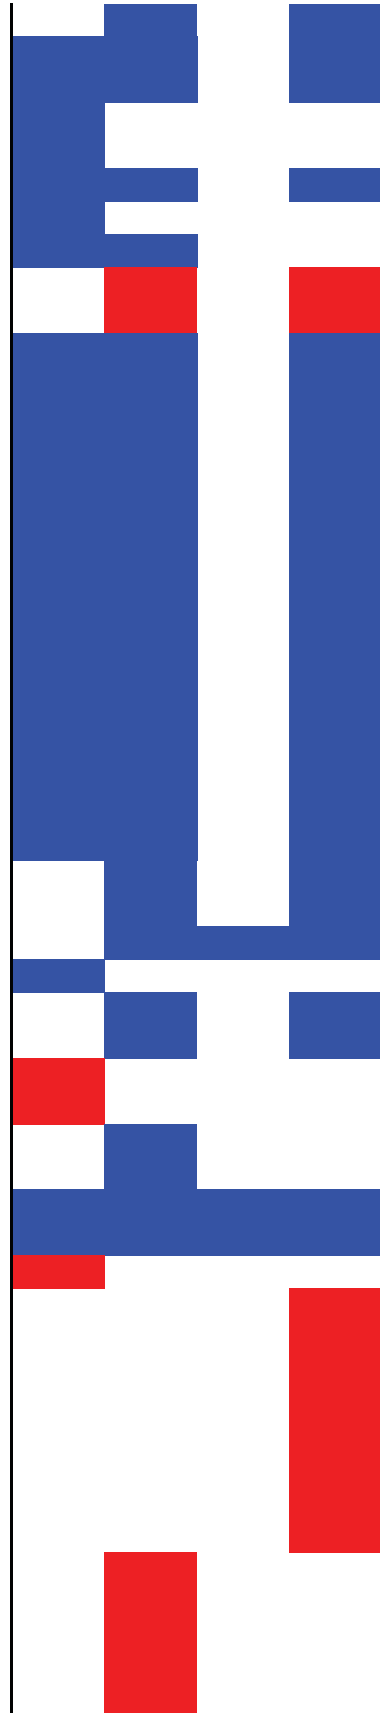

|           |                |
|-----------|----------------|
| 97177668  | 97188790 gain  |
| 97103163  | 97129486 gain  |
| 96552875  | 96558620 gain  |
| 96781327  | 97002869 gain  |
| 97278741  | 97357442 gain  |
| 96656294  | 96666096 gain  |
| 97497208  | 97558949 gain  |
| 97599221  | 97605718 gain  |
| 97617338  | 97624505 gain  |
| 96288230  | 96487297 gain  |
| 97067198  | 97089695 gain  |
| 75338497  | 75876455 gain  |
| 77397072  | 77417405 gain  |
| 83223842  | 83263358 gain  |
| 83288332  | 83404378 gain  |
| 123012765 | 123105283 gain |
| 15714636  | 16182675 loss  |
| 18096710  | 18118444 loss  |
| 34296315  | 34843892 loss  |
| 38826203  | 38827124 loss  |
| 38854198  | 38855134 loss  |
| 59814737  | 59989027 loss  |
| 60435043  | 60535341 loss  |
| 64033599  | 64101412 loss  |
| 64658817  | 64767474 loss  |
| 72286335  | 72306383 loss  |
| 80161136  | 80359045 loss  |
| 81524998  | 81526159 loss  |
| 88618125  | 88626688 loss  |
| 88734001  | 88743028 loss  |
| 92437060  | 92503265 loss  |
| 94418282  | 94438500 loss  |
| 94570310  | 95130871 loss  |
| 101824457 | 102257023 loss |
| 103385265 | 103664167 loss |
| 109381088 | 109398368 loss |
| 109455115 | 109470776 loss |
| 116481863 | 117161601 loss |
| 119057160 | 119066211 loss |
| 119078573 | 119099511 loss |
| 122943858 | 122976676 loss |
| 21312950  | 21342181 gain  |
| 21698477  | 21719708 gain  |
| 21312950  | 21342181 gain  |
| 21698477  | 21719708 gain  |
| 74969558  | 74980067 gain  |
| 82082595  | 82085973 gain  |
| 83185609  | 83225507 gain  |
| 79635688  | 79637864 gain  |
| 77356164  | 77358856 gain  |
| 100055019 | 100081025 gain |
| 43244926  | 43260800 gain  |

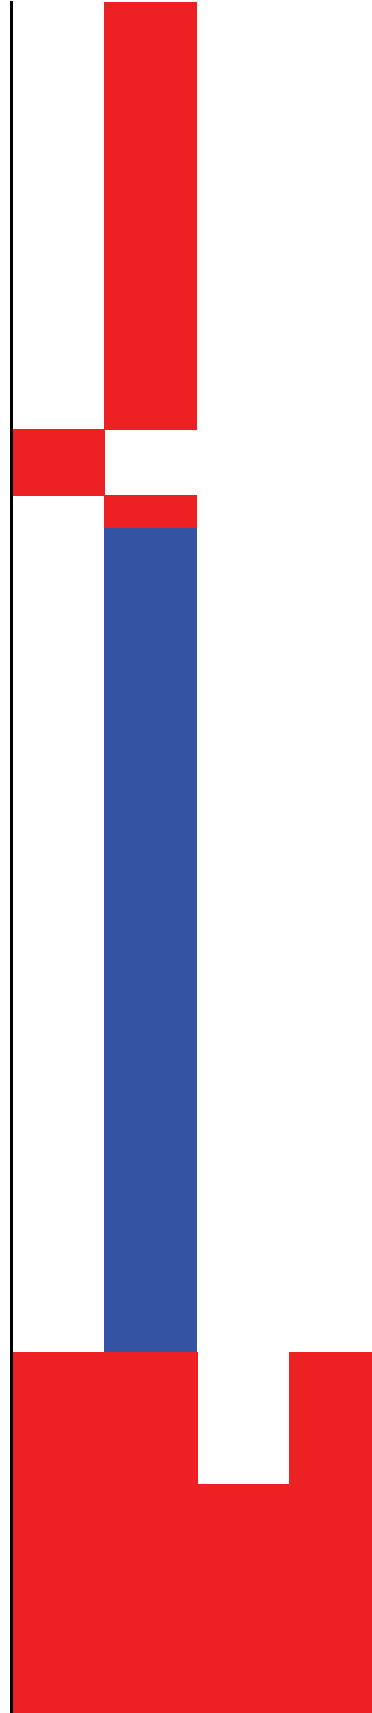

|           |                |
|-----------|----------------|
| 65583356  | 65586812 gain  |
| 38838613  | 38853701 gain  |
| 76025016  | 76032945 gain  |
| 82274867  | 82286987 gain  |
| 67893703  | 68004623 gain  |
| 71442632  | 71443438 gain  |
| 115855176 | 115858291 gain |
| 86520790  | 86693344 gain  |
| 76949399  | 76978558 gain  |
| 86148271  | 86152699 gain  |
| 77441394  | 77448183 gain  |
| 39640187  | 39646729 gain  |
| 25247748  | 25256078 gain  |
| 61570403  | 61573761 gain  |
| 80855808  | 80857824 gain  |
| 61803354  | 61812614 gain  |
| 79780999  | 79783293 gain  |
| 69667414  | 69682459 gain  |
| 80657435  | 80671115 gain  |
| 28692093  | 28706112 gain  |
| 62021217  | 62041205 gain  |
| 80783847  | 80788996 gain  |
| 78527118  | 78560345 gain  |
| 75911825  | 75923963 gain  |
| 80318019  | 80331453 gain  |
| 59809598  | 59835432 gain  |
| 97155692  | 97157560 gain  |
| 80826768  | 80828565 gain  |
| 100034907 | 100051893 gain |
| 85558598  | 85576330 gain  |
| 61911907  | 61914101 gain  |
| 28641768  | 28643313 gain  |
| 87554142  | 87609686 gain  |
| 94136237  | 94151358 gain  |
| 57692726  | 57694761 gain  |
| 115548719 | 115550973 gain |
| 28863801  | 28919434 gain  |
| 40403087  | 40530889 gain  |
| 42894509  | 42896368 gain  |
| 79283765  | 79293197 gain  |
| 110037705 | 110053017 gain |
| 28931448  | 28950585 gain  |
| 105011606 | 105020926 gain |
| 83006685  | 83059218 gain  |
| 33707232  | 33709101 gain  |
| 39612565  | 39619044 gain  |
| 39721378  | 39745074 gain  |
| 84565371  | 84580492 gain  |
| 75012869  | 75023075 gain  |
| 81590757  | 81615810 gain  |
| 79460359  | 79478317 gain  |
| 106402137 | 106560720 gain |

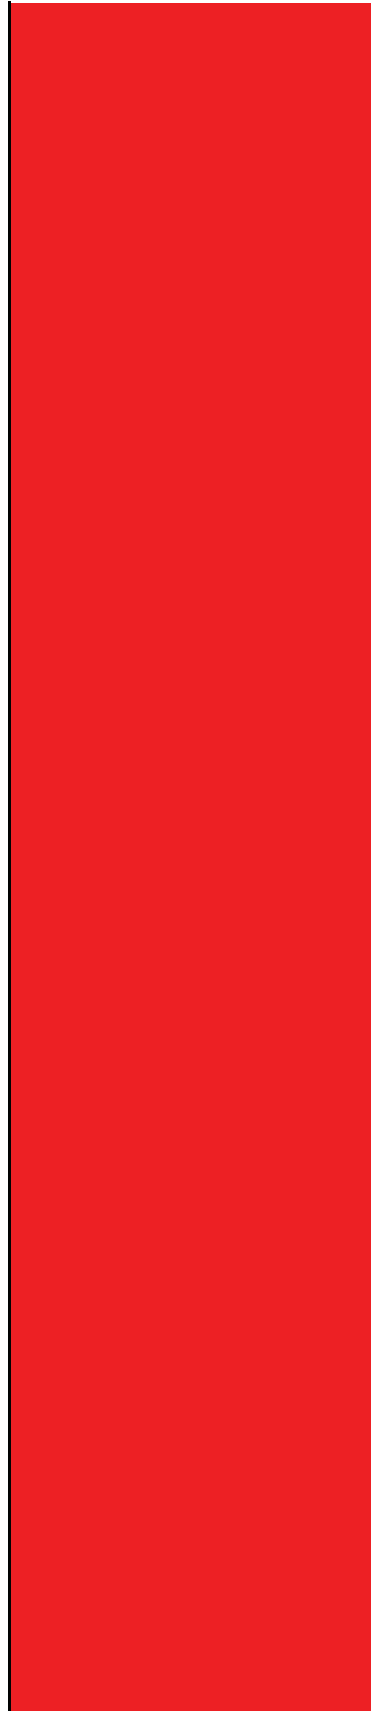

|           |                |
|-----------|----------------|
| 89174717  | 89195040 gain  |
| 60659859  | 60736186 gain  |
| 79803460  | 79811191 gain  |
| 76753471  | 76881018 gain  |
| 80065624  | 80070399 gain  |
| 67007258  | 67011703 gain  |
| 74779687  | 74797533 gain  |
| 81022304  | 81029109 gain  |
| 77734307  | 77814445 gain  |
| 61178010  | 61201400 gain  |
| 43670112  | 43724652 gain  |
| 77492775  | 77506325 gain  |
| 24888895  | 25018969 gain  |
| 82950191  | 82996885 gain  |
| 102470480 | 102491411 gain |
| 40007263  | 40021994 gain  |
| 40007270  | 40021992 gain  |
| 92986082  | 93002778 gain  |
| 80267992  | 80270393 gain  |
| 59450656  | 59465860 gain  |
| 69388279  | 69490184 gain  |
| 81091284  | 81110357 gain  |
| 58684669  | 58689181 gain  |
| 90039435  | 90435729 gain  |
| 88411738  | 88720535 gain  |
| 80169722  | 80204956 gain  |
| 90452055  | 90545488 gain  |
| 80730916  | 80735992 gain  |
| 79764564  | 79781001 gain  |
| 83062778  | 83111409 gain  |
| 26492317  | 26638454 gain  |
| 79389816  | 79417757 gain  |
| 67558340  | 67741474 gain  |
| 88194158  | 88205947 gain  |
| 41634796  | 41738188 gain  |
| 59466074  | 59562738 gain  |
| 50312474  | 50571008 gain  |
| 86953785  | 86956405 gain  |
| 85391235  | 85392392 gain  |
| 53316766  | 53329021 gain  |
| 80667257  | 80693524 gain  |
| 43988163  | 44084097 gain  |
| 62562903  | 62563353 gain  |
| 98377785  | 98488777 gain  |
| 79605059  | 79608563 gain  |
| 79982329  | 80001869 gain  |
| 112362483 | 112366082 gain |
| 58159492  | 58167025 gain  |
| 79327525  | 79337379 gain  |
| 39687958  | 39706452 gain  |
| 81069052  | 81072581 gain  |
| 86168555  | 86187329 gain  |

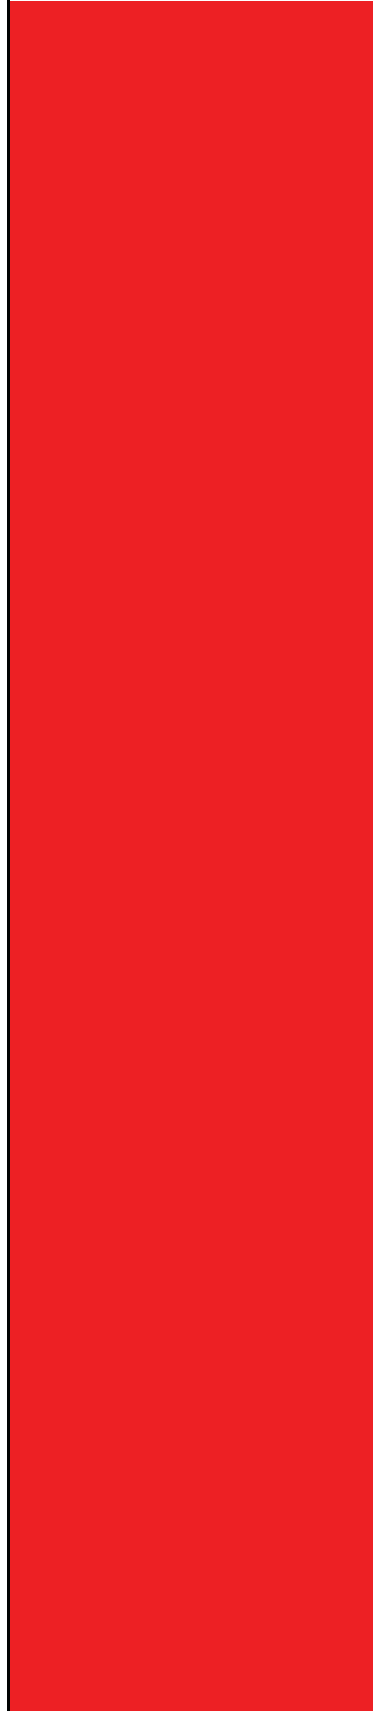



|           |                |
|-----------|----------------|
| 105200240 | 105278436 gain |
| 110735734 | 110738792 gain |
| 74523640  | 74647668 gain  |
| 43198945  | 43235223 gain  |
| 33757402  | 33829621 gain  |
| 70387847  | 70622382 gain  |
| 85422435  | 85474605 gain  |
| 79167102  | 79174724 gain  |
| 85061155  | 85123037 gain  |
| 80105361  | 80119816 gain  |
| 96079634  | 96085445 gain  |
| 45055567  | 45089514 gain  |
| 79372797  | 79379675 gain  |
| 79069598  | 79076763 gain  |
| 70631484  | 70644788 gain  |
| 75108854  | 75227102 gain  |
| 111602731 | 111653611 gain |
| 78174739  | 78181038 gain  |
| 59165382  | 59326870 gain  |
| 62206675  | 62255116 gain  |
| 78209668  | 78215812 gain  |
| 58911180  | 59079440 gain  |
| 57960684  | 58038992 gain  |
| 41258654  | 41307559 gain  |
| 93003376  | 93047071 gain  |
| 94151534  | 94253081 gain  |
| 87663841  | 87708903 gain  |
| 105278534 | 105284566 gain |
| 69559868  | 69655948 gain  |
| 41239305  | 41250848 gain  |
| 43298974  | 43304071 gain  |
| 79144939  | 79151143 gain  |
| 40552698  | 40602949 gain  |
| 59766021  | 60159238 gain  |
| 68799382  | 68815660 gain  |
| 92623620  | 92704087 gain  |
| 40069113  | 40203624 gain  |
| 80921972  | 80945454 gain  |
| 29915814  | 29920346 gain  |
| 99950922  | 100036289 gain |
| 41438651  | 41529436 gain  |
| 79353597  | 79355401 gain  |
| 75398317  | 75400479 gain  |
| 87935557  | 87966715 gain  |
| 82448241  | 82658636 gain  |
| 59644275  | 59682008 gain  |
| 79630585  | 79634398 gain  |
| 70793241  | 70807597 gain  |
| 83989049  | 83996633 gain  |
| 33232139  | 33344406 gain  |
| 79451344  | 79458145 gain  |
| 115922216 | 116018567 gain |



|           |                |
|-----------|----------------|
| 34109786  | 34116891 gain  |
| 61301245  | 61441856 gain  |
| 76514923  | 76629275 gain  |
| 76171536  | 76188789 gain  |
| 76058500  | 76086149 gain  |
| 94637379  | 94786731 gain  |
| 80547077  | 80561617 gain  |
| 84594444  | 84647799 gain  |
| 99220338  | 99222292 gain  |
| 80092400  | 80103516 gain  |
| 110357231 | 110376570 gain |
| 77888414  | 77890367 gain  |
| 62892845  | 64466415 gain  |
| 77624811  | 77632513 gain  |
| 82822965  | 82831580 gain  |
| 85401381  | 85420538 gain  |
| 55734099  | 55948495 gain  |
| 80645751  | 80655942 gain  |
| 79727735  | 79751158 gain  |
| 51953424  | 52041183 gain  |
| 96942133  | 96980796 gain  |
| 59412422  | 59414518 gain  |
| 40349816  | 40369737 gain  |
| 75233977  | 75236119 gain  |
| 62042994  | 62065046 gain  |
| 62078770  | 62113946 gain  |
| 75356142  | 75358686 gain  |
| 75725793  | 75808007 gain  |
| 80482334  | 80488122 gain  |
| 62409776  | 62436936 gain  |
| 59342338  | 59360764 gain  |
| 62845190  | 62871588 gain  |
| 77512586  | 77526360 gain  |
| 80847172  | 80851097 gain  |
| 79593178  | 79602112 gain  |
| 80217950  | 80257092 gain  |
| 87785548  | 87819820 gain  |
| 33871198  | 33927357 gain  |
| 98725864  | 98730123 gain  |
| 57693398  | 57695423 gain  |
| 39341216  | 39451813 gain  |
| 79314121  | 79317716 gain  |
| 110182520 | 110224440 gain |
| 29032971  | 29066467 gain  |
| 58063535  | 58138444 gain  |
| 95403296  | 95508152 gain  |
| 80639375  | 80645254 gain  |
| 79642226  | 79652755 gain  |
| 67000616  | 67004936 gain  |
| 82329370  | 82330674 gain  |
| 60895244  | 60915417 gain  |
| 79349056  | 79350961 gain  |

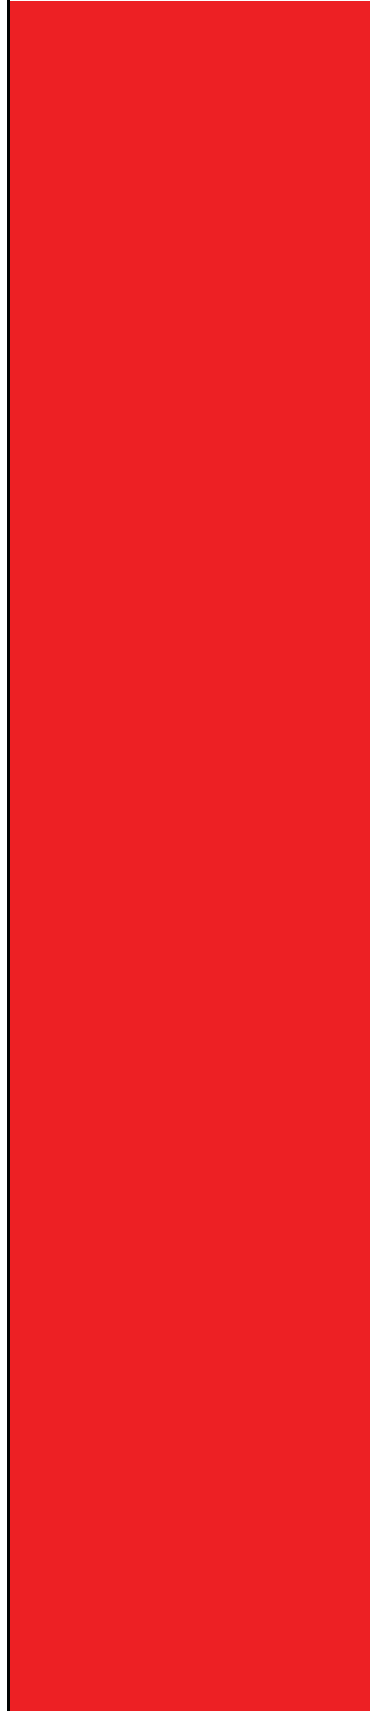

|           |                |
|-----------|----------------|
| 92710160  | 92773904 gain  |
| 25128173  | 25243324 gain  |
| 97106701  | 97144534 gain  |
| 80820314  | 80826780 gain  |
| 43313232  | 43350719 gain  |
| 57504728  | 57508256 gain  |
| 80046393  | 80053086 gain  |
| 69903415  | 70021480 gain  |
| 51305255  | 51310266 gain  |
| 53352951  | 53470715 gain  |
| 33758589  | 33764119 gain  |
| 33811157  | 33816325 gain  |
| 33845872  | 33847778 gain  |
| 85484673  | 85511073 gain  |
| 93498745  | 93608084 gain  |
| 79217863  | 79219706 gain  |
| 84559763  | 84565240 gain  |
| 40907977  | 41023047 gain  |
| 41905591  | 41996548 gain  |
| 34203205  | 34331036 gain  |
| 79240018  | 79245375 gain  |
| 76038392  | 76053083 gain  |
| 39089604  | 39285180 gain  |
| 80829623  | 80841115 gain  |
| 39666719  | 39679959 gain  |
| 80392835  | 80394949 gain  |
| 98570768  | 98575881 gain  |
| 79720895  | 79723713 gain  |
| 88871567  | 88906712 gain  |
| 57718273  | 57768340 gain  |
| 75036337  | 75048927 gain  |
| 75052125  | 75079713 gain  |
| 80800506  | 80806011 gain  |
| 56097105  | 56110225 gain  |
| 111422503 | 111434320 gain |
| 111497244 | 111515566 gain |
| 111520409 | 111545154 gain |
| 82113177  | 82153395 gain  |
| 77315603  | 77316533 gain  |
| 97144047  | 97429724 gain  |
| 81274930  | 81289235 gain  |
| 76720517  | 76721968 gain  |
| 79132154  | 79138871 gain  |
| 116213600 | 116333935 gain |
| 77277426  | 77278149 gain  |
| 77233377  | 77234070 gain  |
| 31133531  | 31134241 gain  |
| 77324719  | 77325383 gain  |
| 99844280  | 99845194 gain  |
| 99813724  | 99824881 gain  |
| 99803471  | 99804396 gain  |
| 99823971  | 99824881 gain  |



|           |                |
|-----------|----------------|
| 99823971  | 99824881 gain  |
| 99829132  | 99830046 gain  |
| 103614078 | 103625055 gain |
| 93756407  | 93761448 gain  |
| 33486229  | 33501921 gain  |
| 82417088  | 82417819 gain  |
| 88192285  | 88193846 gain  |
| 57697595  | 57699408 gain  |
| 75417258  | 75472334 gain  |
| 108136099 | 108137216 gain |
| 110937843 | 110938401 gain |
| 61533769  | 61535319 gain  |
| 74814799  | 74815706 gain  |
| 84776313  | 84777039 gain  |
| 93127988  | 93128599 gain  |
| 26393251  | 26394457 gain  |
| 52997886  | 53099657 gain  |
| 25798060  | 25799253 gain  |
| 80289440  | 80291962 gain  |
| 82092586  | 82113022 gain  |
| 80991476  | 81007791 gain  |
| 80965058  | 80986970 gain  |
| 74429975  | 74478622 gain  |
| 80411368  | 80464110 gain  |
| 87842156  | 87910074 gain  |
| 52056829  | 52101930 gain  |
| 51200484  | 51206025 gain  |
| 40790298  | 40791390 gain  |
| 51334628  | 51351264 gain  |
| 79516781  | 79519184 gain  |
| 48819268  | 49508560 gain  |
| 79433468  | 79439935 gain  |
| 75246557  | 75261329 gain  |
| 75294589  | 75297626 gain  |
| 75236866  | 75244159 gain  |
| 75277688  | 75285288 gain  |
| 39969008  | 39977471 gain  |
| 79151764  | 79158005 gain  |
| 61201394  | 61246612 gain  |
| 45297634  | 45432151 gain  |
| 92951512  | 92979488 gain  |
| 82161751  | 82204137 gain  |
| 79179378  | 79198853 gain  |
| 36694349  | 36721694 gain  |
| 31033210  | 31047892 gain  |
| 62706544  | 62780629 gain  |
| 30552164  | 30562589 gain  |
| 30328012  | 30338172 gain  |
| 61731602  | 61842656 gain  |
| 61845884  | 61885205 gain  |
| 80808790  | 80813171 gain  |
| 79479416  | 79494216 gain  |

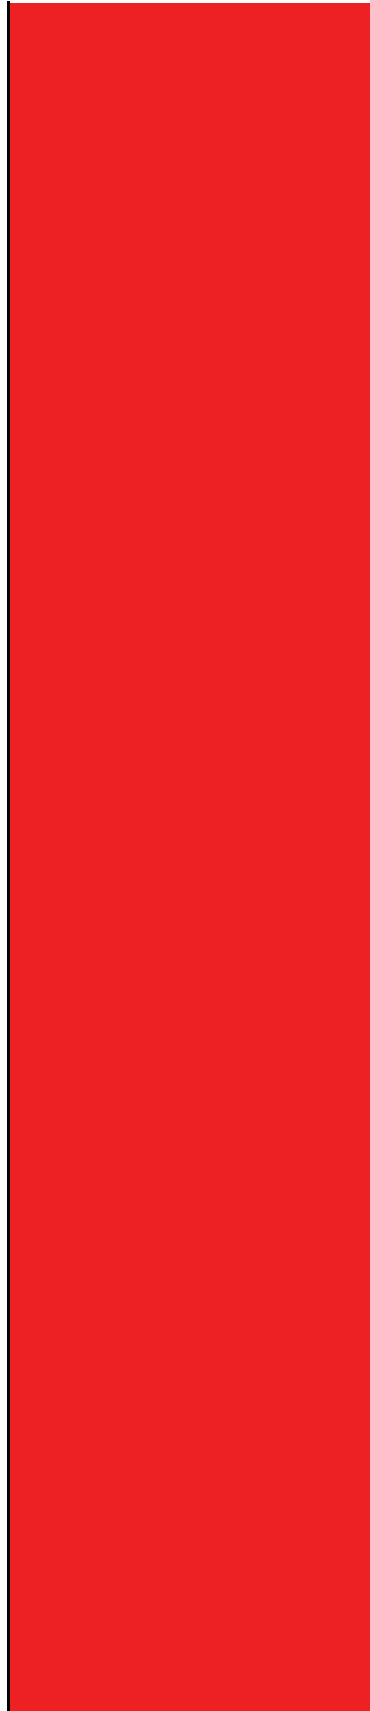

|           |                |
|-----------|----------------|
| 62477411  | 62486597 gain  |
| 36226612  | 36554200 gain  |
| 57206190  | 57232949 gain  |
| 86153585  | 86168189 gain  |
| 77532112  | 77542270 gain  |
| 87321800  | 87399792 gain  |
| 90545783  | 90565358 gain  |
| 78037244  | 78047247 gain  |
| 70810540  | 70848633 gain  |
| 80660914  | 80664782 gain  |
| 76993092  | 77028419 gain  |
| 80165437  | 80168127 gain  |
| 66590005  | 66719074 gain  |
| 80271240  | 80276243 gain  |
| 111708178 | 111903360 gain |
| 115854923 | 115910579 gain |
| 97069838  | 97076322 gain  |
| 79379715  | 79385017 gain  |
| 99478457  | 99563046 gain  |
| 80029865  | 80040041 gain  |
| 111409750 | 111425486 gain |
| 77298691  | 77299996 gain  |
| 77288913  | 77289815 gain  |
| 77183330  | 77184001 gain  |
| 25995257  | 26094991 gain  |
| 77174201  | 77174754 gain  |
| 76881120  | 76883684 gain  |
| 59862473  | 59866306 gain  |
| 99101364  | 99104554 gain  |
| 53000075  | 53003493 gain  |
| 77152701  | 77153502 gain  |
| 53218248  | 53238795 gain  |
| 53795727  | 53800887 gain  |
| 77178551  | 77178914 gain  |
| 77189230  | 77189593 gain  |
| 77261131  | 77261878 gain  |
| 93136962  | 93146067 gain  |
| 99071804  | 99120768 gain  |
| 77169331  | 77169731 gain  |
| 92798976  | 92811624 gain  |
| 42032390  | 42198371 gain  |
| 26701091  | 27336748 gain  |
| 38685320  | 38829994 gain  |
| 114887369 | 115024836 gain |
| 51210780  | 51216417 gain  |
| 57834201  | 57887439 gain  |
| 45096424  | 45190007 gain  |
| 106708886 | 106862199 gain |
| 80295547  | 80306784 gain  |
| 80364107  | 80380990 gain  |
| 60938580  | 61044976 gain  |
| 77360319  | 77365281 gain  |



|           |                |
|-----------|----------------|
| 102677032 | 102698956 gain |
| 63391244  | 63553003 gain  |
| 80315569  | 80317954 gain  |
| 75994371  | 76016679 gain  |
| 92916140  | 92947641 gain  |
| 97028134  | 97035337 gain  |
| 79127318  | 79131281 gain  |
| 53625838  | 53795602 gain  |
| 80568691  | 80587442 gain  |
| 36853048  | 36858732 gain  |
| 80720289  | 80725726 gain  |
| 79855285  | 79862224 gain  |
| 75931715  | 75978602 gain  |
| 53257129  | 53350245 gain  |
| 79357451  | 79371683 gain  |
| 93321234  | 93353947 gain  |
| 79843099  | 79850396 gain  |
| 101837070 | 101854102 gain |
| 41196119  | 41206836 gain  |
| 79611034  | 79621112 gain  |
| 79002989  | 79017836 gain  |
| 75322097  | 75322995 gain  |
| 91599884  | 91599968 gain  |
| 91534830  | 91534930 gain  |
| 44079481  | 44079574 gain  |
| 77103968  | 77104052 gain  |
| 92625529  | 92625648 gain  |
| 80291541  | 80291615 gain  |
| 80734341  | 80734432 gain  |
| 95021864  | 95021955 gain  |
| 101235325 | 101235406 gain |
| 93426512  | 93426608 gain  |
| 75670070  | 75670154 gain  |
| 80128073  | 80134721 gain  |
| 75385968  | 75395208 gain  |
| 80147997  | 80164565 gain  |
| 94943439  | 94964561 gain  |
| 80727466  | 80729671 gain  |
| 55826722  | 55836686 gain  |
| 84582177  | 84590772 gain  |
| 79689342  | 79707889 gain  |
| 87981027  | 88067897 gain  |
| 106919963 | 106923190 gain |
| 106929915 | 106931785 gain |
| 62578542  | 62666700 gain  |
| 110917672 | 110935206 gain |
| 109120494 | 109437275 gain |
| 80949203  | 80959108 gain  |
| 30365387  | 30522913 gain  |
| 93661753  | 93683693 gain  |
| 79712196  | 79719537 gain  |
| 92147489  | 92185163 gain  |

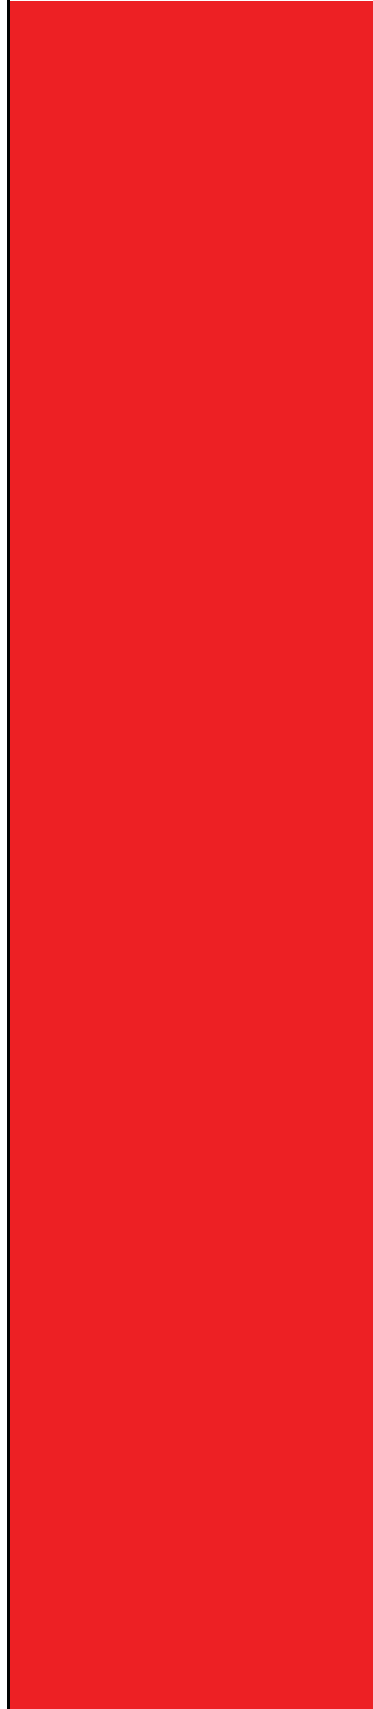

|           |                |
|-----------|----------------|
| 52111413  | 52124410 gain  |
| 61595837  | 61597511 gain  |
| 80858935  | 80889918 gain  |
| 82211444  | 82226886 gain  |
| 31670384  | 32609721 gain  |
| 60880719  | 60888085 gain  |
| 61058231  | 61089133 gain  |
| 88916978  | 88996367 gain  |
| 93610675  | 93659959 gain  |
| 42281776  | 42303394 gain  |
| 66729436  | 66748029 gain  |
| 34023417  | 34138334 gain  |
| 86241749  | 86301134 gain  |
| 93103793  | 93208717 gain  |
| 101944389 | 101953052 gain |
| 83834063  | 83903216 gain  |
| 95009640  | 95026801 gain  |
| 87609736  | 87641140 gain  |
| 52137352  | 52159998 gain  |
| 79439864  | 79447075 gain  |
| 80289400  | 80292035 gain  |
| 79102270  | 79108483 gain  |
| 58885707  | 58904527 gain  |
| 78480068  | 78481028 gain  |
| 78443794  | 78447466 gain  |
| 78426053  | 78433357 gain  |
| 78379586  | 78380681 gain  |
| 78338293  | 78342851 gain  |
| 78309695  | 78310658 gain  |
| 78074413  | 78080819 gain  |
| 78497467  | 78498547 gain  |
| 78417951  | 78418884 gain  |
| 79957650  | 79980005 gain  |
| 110601857 | 110734303 gain |
| 42398721  | 42422268 gain  |
| 107199365 | 107349190 gain |
| 58786043  | 58836052 gain  |
| 86984539  | 87046882 gain  |
| 79256316  | 79283641 gain  |
| 107769244 | 107851447 gain |
| 62524364  | 62540284 gain  |
| 62487259  | 62521560 gain  |
| 60552090  | 60557077 gain  |
| 76224598  | 76424692 gain  |
| 73284614  | 73970345 gain  |
| 75813998  | 75905657 gain  |
| 79784027  | 79792218 gain  |
| 42941291  | 43184688 gain  |
| 77899491  | 77927693 gain  |
| 77449693  | 77472541 gain  |
| 110943341 | 110945705 gain |
| 70020433  | 70062039 gain  |



|           |                |
|-----------|----------------|
| 80616715  | 80630465 gain  |
| 80755716  | 80782719 gain  |
| 57365674  | 57460918 gain  |
| 58866432  | 58884724 gain  |
| 60390973  | 60400880 gain  |
| 80258843  | 80261371 gain  |
| 79819203  | 79828234 gain  |
| 53057491  | 53065805 gain  |
| 94253611  | 94407212 gain  |
| 87553816  | 87555119 gain  |
| 98569804  | 98660622 gain  |
| 76722044  | 76732331 gain  |
| 79498697  | 79502404 gain  |
| 84085181  | 84189923 gain  |
| 79198869  | 79209326 gain  |
| 45009110  | 45038256 gain  |
| 61111368  | 61136913 gain  |
| 78989173  | 78996532 gain  |
| 105907394 | 106369573 gain |
| 41210244  | 41234094 gain  |
| 107599455 | 107714631 gain |
| 44156980  | 44178493 gain  |
| 85354712  | 85379690 gain  |
| 44787019  | 44878801 gain  |
| 60760583  | 60767011 gain  |
| 75669966  | 75700610 gain  |
| 79244218  | 79251730 gain  |
| 79342411  | 79345917 gain  |
| 59740375  | 59765348 gain  |
| 79317349  | 79327178 gain  |
| 115738429 | 115826594 gain |
| 27794625  | 28317203 gain  |
| 106954415 | 107157083 gain |
| 115580953 | 115711985 gain |
| 77044511  | 77061477 gain  |
| 85334575  | 85351848 gain  |
| 77633654  | 77647894 gain  |
| 43593995  | 43621542 gain  |
| 114726917 | 114752647 gain |
| 74499833  | 74516845 gain  |
| 57909599  | 57956902 gain  |
| 101974855 | 102009194 gain |
| 66471936  | 66559736 gain  |
| 79792889  | 79799186 gain  |
| 39451965  | 39595011 gain  |
| 80003670  | 80024305 gain  |
| 38540346  | 38541585 gain  |
| 84218792  | 84369281 gain  |
| 51397565  | 51450235 gain  |
| 68675404  | 68754532 gain  |
| 84380400  | 84479192 gain  |
| 91544490  | 91627923 gain  |

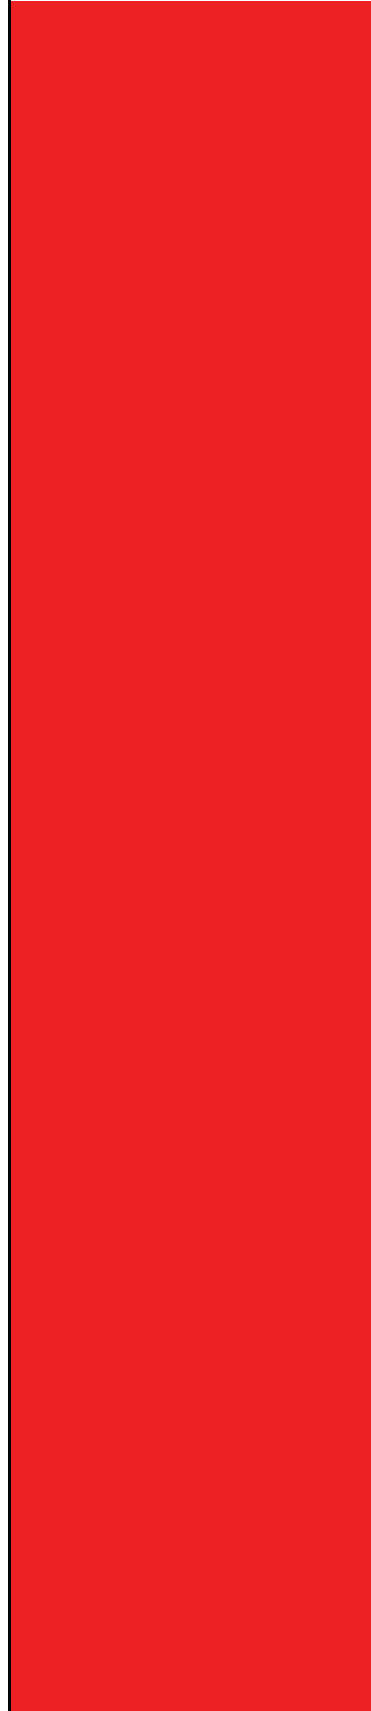



|           |                |
|-----------|----------------|
| 79221259  | 79229666 gain  |
| 29063981  | 29082248 gain  |
| 31221692  | 31329531 gain  |
| 51765731  | 51915050 gain  |
| 39943051  | 39966785 gain  |
| 79755175  | 79756859 gain  |
| 77863106  | 77875788 gain  |
| 33624916  | 33635827 gain  |
| 29172912  | 29255673 gain  |
| 74420221  | 74495331 gain  |
| 67442345  | 67506612 gain  |
| 43621612  | 43667668 gain  |
| 62442970  | 62481490 gain  |
| 33716360  | 33739422 gain  |
| 75716580  | 75724064 gain  |
| 80960489  | 80962882 gain  |
| 25949512  | 25980610 gain  |
| 61143068  | 61156045 gain  |
| 79519758  | 79565447 gain  |
| 80065626  | 80078528 gain  |
| 42580317  | 42680588 gain  |
| 89102851  | 89149030 gain  |
| 42481301  | 42552320 gain  |
| 58626859  | 58684595 gain  |
| 57235581  | 57252335 gain  |
| 41607244  | 41628242 gain  |
| 80261479  | 80267667 gain  |
| 60561389  | 60610413 gain  |
| 80506817  | 80522899 gain  |
| 58276106  | 58601664 gain  |
| 79080682  | 79100663 gain  |
| 50615456  | 50708958 gain  |
| 62781752  | 62801783 gain  |
| 81084530  | 81090067 gain  |
| 39753340  | 39862060 gain  |
| 69708023  | 69748699 gain  |
| 89036764  | 89083994 gain  |
| 76495483  | 76513177 gain  |
| 78243240  | 78277570 gain  |
| 40290167  | 40323938 gain  |
| 62383380  | 62409242 gain  |
| 90579322  | 90586708 gain  |
| 60174819  | 60215530 gain  |
| 52410306  | 52831428 gain  |
| 80491284  | 80496657 gain  |
| 82693883  | 82800562 gain  |
| 75610195  | 75652010 gain  |
| 75521365  | 75573763 gain  |
| 88348736  | 88392260 gain  |
| 102830476 | 102882011 gain |
| 75359513  | 75384359 gain  |
| 41206977  | 41210146 gain  |



|           |                |
|-----------|----------------|
| 57514349  | 57531636 gain  |
| 80641705  | 80641758 gain  |
| 74980786  | 74998185 gain  |
| 93045773  | 93052403 gain  |
| 42221859  | 42255175 gain  |
| 42722305  | 42894336 gain  |
| 94874123  | 94878846 gain  |
| 74674817  | 74775145 gain  |
| 43935230  | 43939391 gain  |
| 88138014  | 88145768 gain  |
| 59569004  | 59596661 gain  |
| 61957175  | 61970503 gain  |
| 86303954  | 86470687 gain  |
| 79579280  | 79593215 gain  |
| 62122169  | 62188847 gain  |
| 33577527  | 33599281 gain  |
| 77068978  | 77081076 gain  |
| 61892125  | 61912441 gain  |
| 75099363  | 75106753 gain  |
| 87922331  | 87935981 gain  |
| 78047247  | 78054709 gain  |
| 85754337  | 85961641 gain  |
| 107935313 | 108447675 gain |
| 61715185  | 61728738 gain  |
| 60634711  | 60651589 gain  |
| 114634926 | 114688549 gain |
| 80791475  | 80797917 gain  |
| 79871909  | 79896398 gain  |
| 84039691  | 84077100 gain  |
| 82092582  | 82113239 gain  |
| 62267317  | 62342762 gain  |
| 70688224  | 70700792 gain  |
| 114807021 | 114821491 gain |
| 79039221  | 79049881 gain  |
| 28388200  | 28602555 gain  |
| 80532827  | 80545105 gain  |
| 80362194  | 80363714 gain  |
| 85763156  | 85812250 gain  |
| 80735944  | 80754012 gain  |
| 81038276  | 81053590 gain  |
| 81053649  | 81063645 gain  |
| 94039007  | 94053699 gain  |
| 114777795 | 114799318 gain |
| 25710991  | 25798858 gain  |
| 68186493  | 68245402 gain  |
| 90610315  | 90634327 gain  |
| 80342560  | 80362239 gain  |
| 104624719 | 105011535 gain |
| 99910817  | 99949981 gain  |
| 31052185  | 31165727 gain  |
| 114515696 | 114622078 gain |
| 39332739  | 39375113 gain  |



|           |                |
|-----------|----------------|
| 77649470  | 77707387 gain  |
| 32803288  | 33196515 gain  |
| 113835876 | 114238426 gain |
| 30254030  | 30320555 gain  |
| 77370466  | 77432617 gain  |
| 61648143  | 61693966 gain  |
| 115254339 | 115286949 gain |
| 34001995  | 34004691 gain  |
| 34017226  | 34021126 gain  |
| 38853828  | 38870864 gain  |
| 82296695  | 82360469 gain  |
| 87429415  | 87430762 gain  |
| 61158261  | 61165521 gain  |
| 70717727  | 70748010 gain  |
| 77085065  | 77108735 gain  |
| 94977795  | 95008292 gain  |
| 89207735  | 89282614 gain  |
| 60225342  | 60294329 gain  |
| 74869778  | 74902940 gain  |
| 79865741  | 79869566 gain  |
| 93294299  | 93311283 gain  |
| 88209351  | 88289559 gain  |
| 93430844  | 93498493 gain  |
| 51742491  | 51748277 gain  |
| 78611560  | 78657678 gain  |
| 78710521  | 78757280 gain  |
| 78819335  | 78859511 gain  |
| 78931702  | 78954899 gain  |
| 75411056  | 75412391 gain  |
| 61917590  | 61949553 gain  |
| 40603339  | 40658375 gain  |
| 79422896  | 79431991 gain  |
| 38870776  | 38883600 gain  |
| 60782404  | 60846271 gain  |
| 75922311  | 75931859 gain  |
| 41170201  | 41185380 gain  |
| 80599015  | 80614402 gain  |
| 110378835 | 110447122 gain |
| 52262125  | 52265545 gain  |
| 114822014 | 114869827 gain |
| 75495356  | 75505714 gain  |
| 67348852  | 67375410 gain  |
| 81364655  | 81393225 gain  |
| 81510871  | 81524331 gain  |
| 81687601  | 81704020 gain  |
| 80695907  | 80714868 gain  |
| 33646741  | 33671018 gain  |
| 72117642  | 72132537 gain  |
| 128237091 | 128241426 gain |
| 120202787 | 120211541 gain |
| 123906129 | 123961544 gain |
| 129759907 | 129799698 gain |

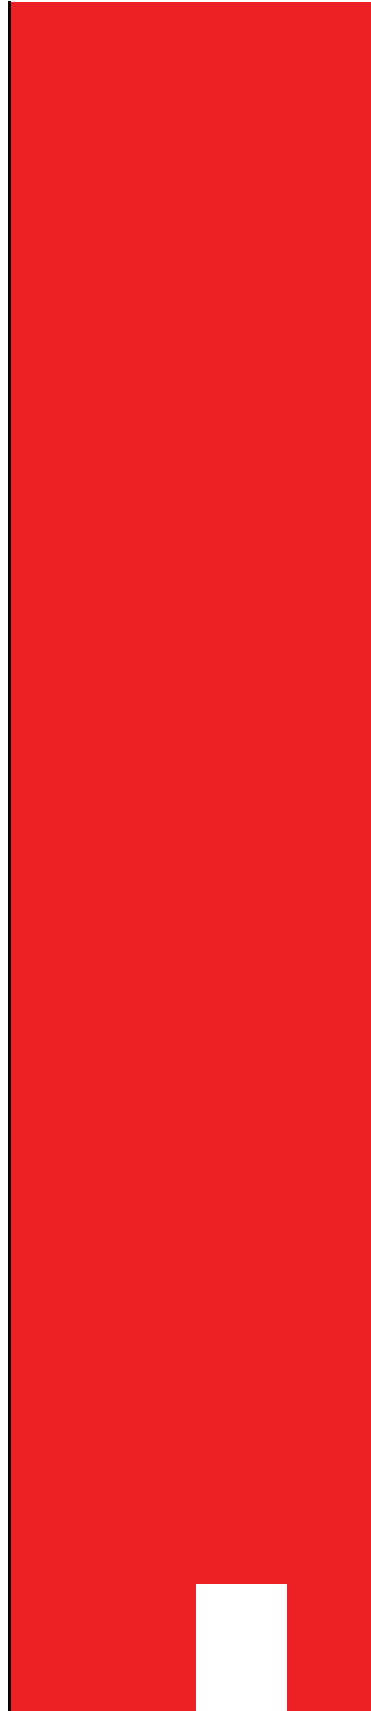

|           |                |
|-----------|----------------|
| 126515962 | 126530225 gain |
| 127814179 | 127831062 gain |
| 127705052 | 127707207 gain |
| 127691186 | 127692957 gain |
| 126760782 | 126766999 gain |
| 126619576 | 126627110 gain |
| 127520362 | 127527444 gain |
| 126437764 | 126458050 gain |
| 121885554 | 121890509 gain |
| 126602886 | 126609386 gain |
| 121176992 | 121189915 gain |
| 127303531 | 127314375 gain |
| 127529838 | 127566359 gain |
| 128356969 | 128360580 gain |
| 118635867 | 118677111 gain |
| 128345974 | 128349874 gain |
| 128134994 | 128142107 gain |
| 126500658 | 126504338 gain |
| 127759514 | 127764243 gain |
| 127800152 | 127807093 gain |
| 127774887 | 127799535 gain |
| 126432668 | 126437031 gain |
| 126485301 | 126490062 gain |
| 121078756 | 121130970 gain |
| 126703317 | 126719015 gain |
| 126727848 | 126733344 gain |
| 128157191 | 128181112 gain |
| 128242731 | 128256502 gain |
| 126627433 | 126632765 gain |
| 118296404 | 118305959 gain |
| 128006423 | 128026557 gain |
| 127947305 | 127962915 gain |
| 122701131 | 123178035 gain |
| 128321601 | 128328774 gain |
| 126766937 | 126778635 gain |
| 127631690 | 127647060 gain |
| 121556752 | 121567614 gain |
| 121515167 | 121516935 gain |
| 120802145 | 120834301 gain |
| 127186657 | 127188854 gain |
| 119256567 | 119512649 gain |
| 119520663 | 119550021 gain |
| 119798330 | 119913991 gain |
| 127427991 | 127444564 gain |
| 128069470 | 128083049 gain |
| 127733195 | 127735140 gain |
| 126793381 | 126807600 gain |
| 126786457 | 126788828 gain |
| 119578709 | 119638593 gain |
| 128370868 | 128395340 gain |
| 126662750 | 126700419 gain |
| 126469960 | 126478450 gain |

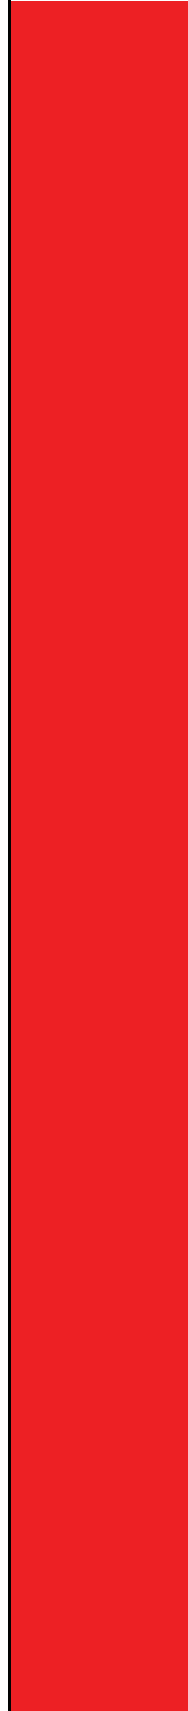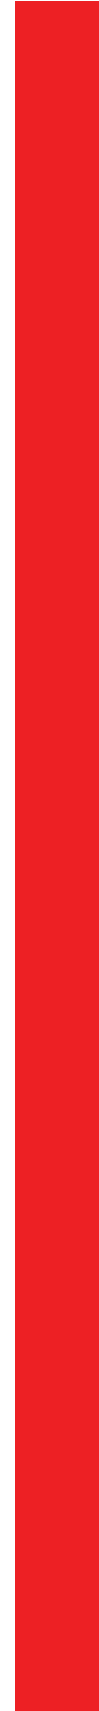

|           |                |
|-----------|----------------|
| 120294684 | 120300384 gain |
| 120360466 | 120416386 gain |
| 119664115 | 119669126 gain |
| 125403274 | 125452415 gain |
| 126975213 | 127058204 gain |
| 126493105 | 126497240 gain |
| 126733276 | 126748842 gain |
| 126719011 | 126725827 gain |
| 126478987 | 126482517 gain |
| 128395332 | 128398044 gain |
| 127662893 | 127668867 gain |
| 126432585 | 126432669 gain |
| 126435495 | 126435616 gain |
| 127522341 | 127522450 gain |
| 119885046 | 119885166 gain |
| 122422695 | 122422780 gain |
| 128227965 | 128237880 gain |
| 122429116 | 122513561 gain |
| 120218156 | 120336027 gain |
| 127927916 | 127930881 gain |
| 127931212 | 127935741 gain |
| 127142311 | 127157996 gain |
| 127097973 | 127103759 gain |
| 127472401 | 127485693 gain |
| 126951994 | 126954210 gain |
| 129705207 | 129717296 gain |
| 126962528 | 126971615 gain |
| 127838450 | 127846852 gain |
| 129420535 | 129421480 gain |
| 128448342 | 128449272 gain |
| 128483187 | 128484117 gain |
| 128516087 | 128517017 gain |
| 128530089 | 128531028 gain |
| 128548540 | 128549479 gain |
| 128569886 | 128570822 gain |
| 128597084 | 128598038 gain |
| 128611106 | 128612110 gain |
| 128623539 | 128624475 gain |
| 128675206 | 128676145 gain |
| 128687591 | 128688530 gain |
| 128698018 | 128698957 gain |
| 128705441 | 128706377 gain |
| 128758680 | 128759619 gain |
| 128769938 | 128770874 gain |
| 128787620 | 128788565 gain |
| 128824690 | 128825650 gain |
| 128873869 | 128874808 gain |
| 128899733 | 128900672 gain |
| 128909749 | 128910685 gain |
| 128937941 | 128938910 gain |
| 128963284 | 128964223 gain |
| 128977594 | 128978530 gain |

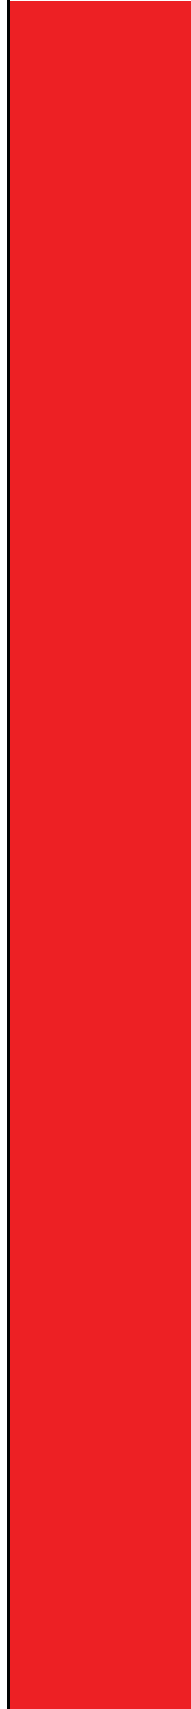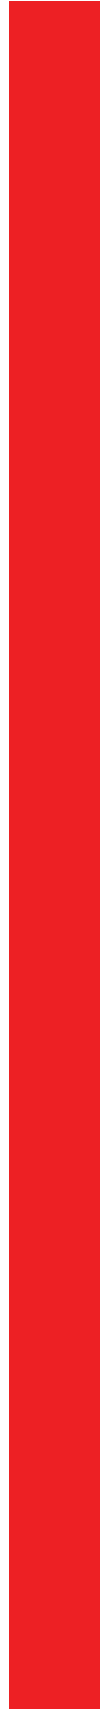

|           |                |
|-----------|----------------|
| 129007712 | 129008675 gain |
| 129044602 | 129045535 gain |
| 129062179 | 129063115 gain |
| 129084185 | 129085121 gain |
| 129096863 | 129097799 gain |
| 129106616 | 129107573 gain |
| 129118854 | 129119793 gain |
| 129128168 | 129129095 gain |
| 129141935 | 129142880 gain |
| 129159638 | 129160598 gain |
| 129175029 | 129175971 gain |
| 129191568 | 129192504 gain |
| 129204553 | 129205492 gain |
| 129212926 | 129213913 gain |
| 129227704 | 129228643 gain |
| 129238619 | 129239579 gain |
| 129279163 | 129280096 gain |
| 129293575 | 129294508 gain |
| 129310878 | 129311811 gain |
| 129338831 | 129339782 gain |
| 129348393 | 129349332 gain |
| 129382159 | 129383116 gain |
| 129402791 | 129403754 gain |
| 129454418 | 129455357 gain |
| 129470683 | 129471616 gain |
| 129511467 | 129512406 gain |
| 129548896 | 129549844 gain |
| 129563163 | 129564111 gain |
| 129599417 | 129600380 gain |
| 129616992 | 129617934 gain |
| 129647215 | 129648184 gain |
| 128426969 | 128427908 gain |
| 128254512 | 128258687 gain |
| 126531314 | 126558216 gain |
| 127994821 | 128002990 gain |
| 127740390 | 127758403 gain |
| 126634122 | 126648678 gain |
| 128143313 | 128157294 gain |
| 122115817 | 122359030 gain |
| 127452270 | 127467086 gain |
| 127496037 | 127514310 gain |
| 126827366 | 126936440 gain |
| 128114238 | 128133324 gain |
| 120847406 | 120913306 gain |
| 127566525 | 127617353 gain |
| 127196818 | 127205355 gain |
| 127238208 | 127252895 gain |
| 127261271 | 127283621 gain |
| 127286983 | 127298232 gain |
| 128350646 | 128356353 gain |
| 127321082 | 127325789 gain |
| 127213460 | 127229753 gain |



|           |                |
|-----------|----------------|
| 127848671 | 127878497 gain |
| 127985165 | 127986224 gain |
| 128061584 | 128063562 gain |
| 128258826 | 128314694 gain |
| 127335590 | 127348815 gain |
| 126954194 | 126959491 gain |
| 124664540 | 124765591 gain |
| 126609481 | 126617701 gain |
| 127832987 | 127838280 gain |
| 127896291 | 127927230 gain |
| 127646965 | 127648850 gain |
| 121222297 | 121484249 gain |
| 126938772 | 126945871 gain |
| 127707631 | 127729905 gain |
| 127080041 | 127098043 gain |
| 128106942 | 128110974 gain |
| 127162447 | 127168824 gain |
| 120700875 | 120748245 gain |
| 120983512 | 121023850 gain |
| 127669118 | 127689997 gain |
| 119645881 | 119661953 gain |
| 127114120 | 127138103 gain |
| 121518315 | 121534158 gain |
| 126459387 | 126467870 gain |
| 126504345 | 126507317 gain |
| 122550299 | 122633979 gain |
| 129822855 | 129831297 gain |
| 129855316 | 129866668 gain |
| 129883254 | 129892950 gain |
| 129908876 | 129934435 gain |
| 128184934 | 128203620 gain |
| 120471059 | 120537698 gain |
| 121024435 | 121063372 gain |
| 126324303 | 126338427 gain |
| 127176593 | 127184395 gain |
| 127980620 | 127984800 gain |
| 122429116 | 122513561 gain |
| 126793381 | 126807600 gain |
| 127162447 | 127168824 gain |
| 30854397  | 31002704 loss  |
| 31259440  | 31270061 loss  |
| 115301858 | 115309582 gain |
| 115336990 | 115351780 gain |
| 115445568 | 115465220 gain |
| 115358666 | 115375684 gain |
| 115351739 | 115353128 gain |
| 115425757 | 115445238 gain |
| 115323786 | 115335712 gain |
| 115384422 | 115397544 gain |
| 25778663  | 25780957 gain  |
| 26991662  | 27100121 gain  |
| 29436692  | 29552356 loss  |

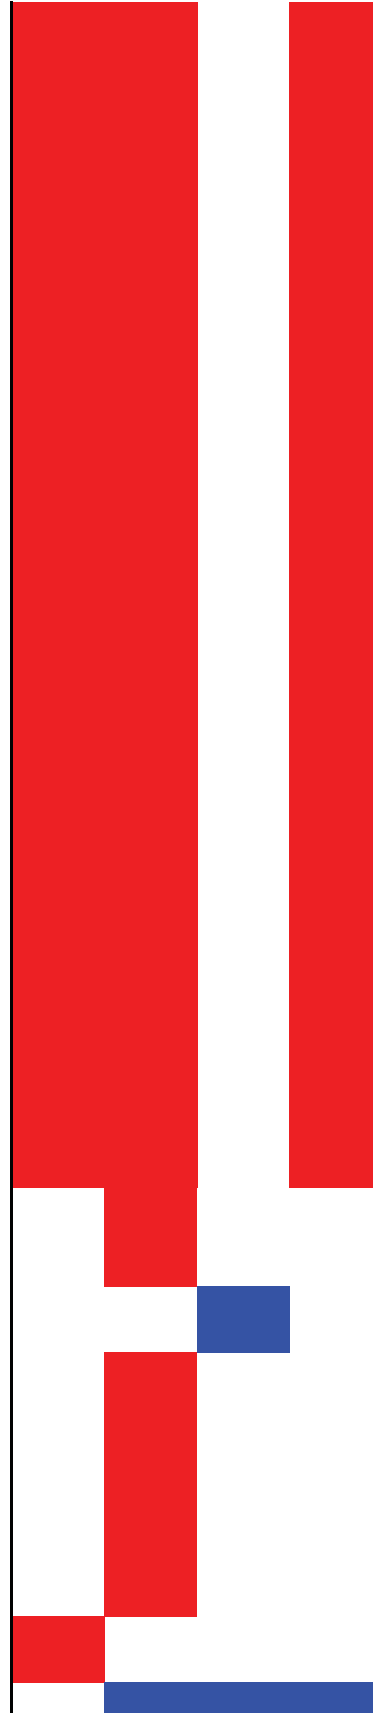

|           |                |
|-----------|----------------|
| 23126206  | 23127310 gain  |
| 23167660  | 23168563 gain  |
| 37437213  | 37510905 loss  |
| 58909193  | 59231328 gain  |
| 59594764  | 59658680 gain  |
| 118009379 | 118063222 loss |
| 118391126 | 118769835 loss |
| 3849203   | 3889441 loss   |
| 5153653   | 5162268 loss   |
| 3224445   | 3234357 loss   |
| 4126976   | 4144402 loss   |
| 6956219   | 6964661 loss   |
| 3049304   | 3077025 loss   |
| 3920623   | 3936392 loss   |
| 3757740   | 3775300 loss   |
| 3518337   | 3539580 loss   |
| 29718128  | 30535050 loss  |
| 30781565  | 30788260 loss  |
| 33015156  | 33110735 loss  |
| 32993351  | 33015077 loss  |
| 33015156  | 33110735 loss  |
| 33015156  | 33110735 loss  |
| 33135204  | 33161006 loss  |
| 44020916  | 44026344 loss  |
| 44396430  | 44397304 loss  |
| 44180291  | 44185678 loss  |
| 41985500  | 41998487 loss  |
| 44534733  | 44540745 loss  |
| 44579490  | 44579934 loss  |
| 44579490  | 44579934 loss  |
| 44680318  | 44681196 loss  |
| 45949498  | 45968746 loss  |
| 79688556  | 79701442 loss  |
| 76486038  | 76510622 loss  |
| 79248984  | 79465079 loss  |
| 49846033  | 49865103 loss  |
| 77077374  | 77086915 loss  |
| 61911819  | 61924171 loss  |
| 55305007  | 55309579 loss  |
| 59751876  | 59761730 loss  |
| 56364529  | 56374471 loss  |
| 70537975  | 70553598 loss  |
| 50301693  | 50403042 loss  |
| 64589958  | 64606617 loss  |
| 55269347  | 55273937 loss  |
| 55202499  | 55224745 loss  |
| 49498547  | 49506787 loss  |
| 75415833  | 75452339 loss  |
| 62153141  | 62175723 loss  |
| 49066026  | 49134834 loss  |
| 77424007  | 77436424 loss  |
| 84858644  | 84876231 loss  |

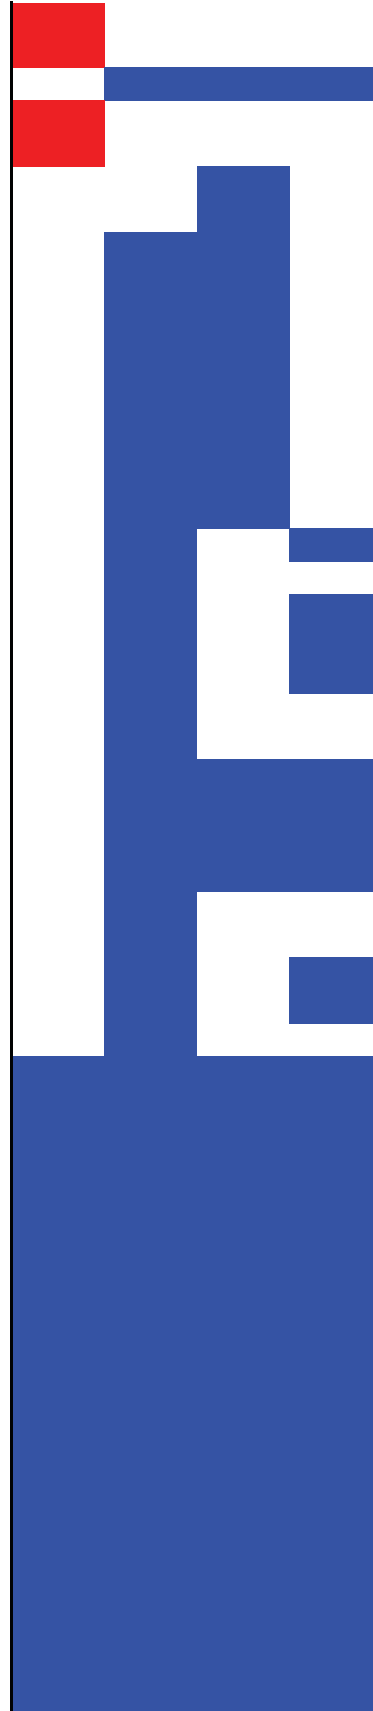



|          |               |
|----------|---------------|
| 70554211 | 70559309 loss |
| 78480830 | 78488814 loss |
| 52419720 | 52446034 loss |
| 54878971 | 54888840 loss |
| 55260997 | 55272522 loss |
| 66646165 | 66696570 loss |
| 69224083 | 69273899 loss |
| 69115393 | 69151746 loss |
| 69181443 | 69200129 loss |
| 56387928 | 56402856 loss |
| 67254094 | 67352166 loss |
| 78892052 | 78936667 loss |
| 51715674 | 51721684 loss |
| 51815160 | 51815598 loss |
| 52383566 | 52393265 loss |
| 55717686 | 55725430 loss |
| 51544623 | 51546863 loss |
| 52604507 | 52625922 loss |
| 61928589 | 61930773 loss |
| 56983904 | 57007388 loss |
| 60266577 | 60705671 loss |
| 55502261 | 55507071 loss |
| 70499951 | 70538013 loss |
| 63991673 | 64036024 loss |
| 70874361 | 70920067 loss |
| 67604076 | 67627714 loss |
| 61386970 | 61399706 loss |
| 60059817 | 60167740 loss |
| 56497756 | 56503093 loss |
| 77436578 | 77512011 loss |
| 66456138 | 66485441 loss |
| 51408923 | 51415403 loss |
| 60178224 | 60216796 loss |
| 68294410 | 68333898 loss |
| 55250828 | 55260201 loss |
| 55329199 | 55331011 loss |
| 57145597 | 57190683 loss |
| 52817825 | 52857247 loss |
| 70116785 | 70132377 loss |
| 66759796 | 66771785 loss |
| 56372891 | 56377261 loss |
| 66587319 | 66600382 loss |
| 56560287 | 56563498 loss |
| 56590264 | 56592832 loss |
| 55555306 | 55558114 loss |
| 76102157 | 76154300 loss |
| 75642093 | 75683360 loss |
| 56129284 | 56136268 loss |
| 57893870 | 58017320 loss |
| 63741301 | 63764758 loss |
| 56718717 | 56721411 loss |
| 73428934 | 73448921 loss |

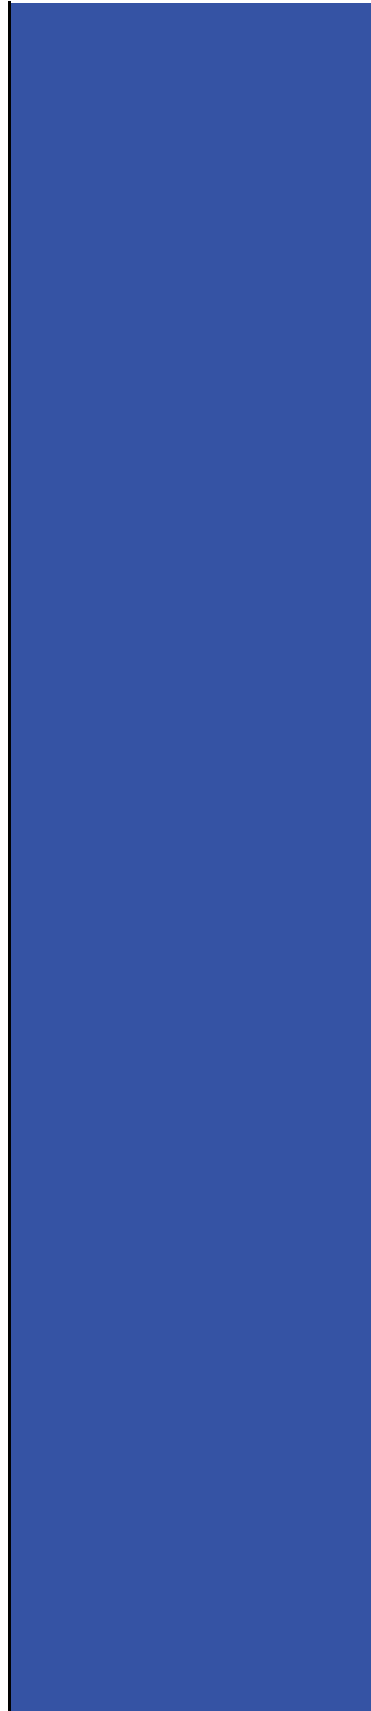

|          |               |
|----------|---------------|
| 59966243 | 59984327 loss |
| 55587623 | 55593186 loss |
| 69908454 | 69912356 loss |
| 54855159 | 54873604 loss |
| 56178865 | 56188902 loss |
| 63652923 | 63656683 loss |
| 63665827 | 63667443 loss |
| 63630607 | 63636925 loss |
| 63616913 | 63619997 loss |
| 63596360 | 63603347 loss |
| 78969415 | 79124896 loss |
| 56357856 | 56364521 loss |
| 55840843 | 55860277 loss |
| 56097594 | 56109177 loss |
| 87056129 | 87540921 loss |
| 62221672 | 62301210 loss |
| 62895065 | 62911816 loss |
| 78226023 | 78274724 loss |
| 68369984 | 68551629 loss |
| 71174187 | 71178301 loss |
| 67421700 | 67487437 loss |
| 51874936 | 51875787 loss |
| 51823369 | 51823831 loss |
| 51823364 | 51823831 loss |
| 51781934 | 51782693 loss |
| 52473442 | 52474317 loss |
| 52473672 | 52474140 loss |
| 67852128 | 68048604 loss |
| 61958599 | 61979282 loss |
| 51736227 | 51737466 loss |
| 58535116 | 58618099 loss |
| 55535379 | 55545625 loss |
| 70477251 | 70479964 loss |
| 79881000 | 79982283 loss |
| 66149292 | 66211847 loss |
| 77556622 | 78121214 loss |
| 69955207 | 69984799 loss |
| 71003477 | 71029961 loss |
| 66703213 | 66743337 loss |
| 78304045 | 78402463 loss |
| 66437863 | 66452806 loss |
| 75132151 | 75150250 loss |
| 49631818 | 49686342 loss |
| 65670895 | 65716943 loss |
| 58425397 | 58445000 loss |
| 60997122 | 60999840 loss |
| 56200360 | 56204091 loss |
| 70983101 | 70999642 loss |
| 64055230 | 64084339 loss |
| 65885537 | 65940339 loss |
| 63763987 | 63796630 loss |
| 71036011 | 71042075 loss |

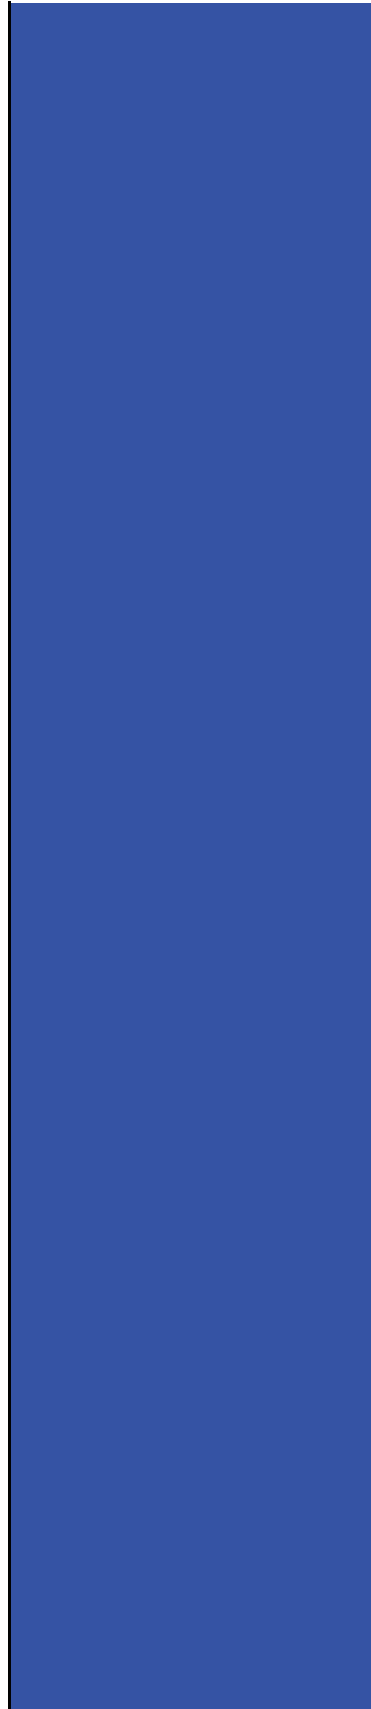

|          |               |
|----------|---------------|
| 58691522 | 58731557 loss |
| 56194510 | 56195789 loss |
| 72937759 | 73109810 loss |
| 65811277 | 65881300 loss |
| 52636539 | 52639462 loss |
| 63817751 | 63864097 loss |
| 71289936 | 71379645 loss |
| 57654496 | 57676782 loss |
| 57717438 | 57723539 loss |
| 57742139 | 57752414 loss |
| 58417054 | 58421167 loss |
| 80260327 | 80268983 loss |
| 78193751 | 78198775 loss |
| 59939800 | 59960167 loss |
| 90296030 | 90299254 loss |
| 59777339 | 59797586 loss |
| 67487686 | 67489842 loss |
| 79851641 | 79854623 loss |
| 52172464 | 52282628 loss |
| 52331318 | 52336807 loss |
| 66224103 | 66267280 loss |
| 48818390 | 48848088 loss |
| 67923724 | 67933548 loss |
| 59863277 | 59879053 loss |
| 59999669 | 60012349 loss |
| 77879289 | 77906675 loss |
| 73425409 | 73426697 loss |
| 56291071 | 56297588 loss |
| 68363285 | 68367493 loss |
| 76296743 | 76410672 loss |
| 63011506 | 63075126 loss |
| 66605623 | 66628047 loss |
| 56877694 | 56881097 loss |
| 56850237 | 56853493 loss |
| 56748404 | 56751430 loss |
| 56736455 | 56739462 loss |
| 56824099 | 56830244 loss |
| 56775417 | 56778416 loss |
| 56784632 | 56793433 loss |
| 55160621 | 55173198 loss |
| 65441054 | 65568684 loss |
| 52693054 | 52723703 loss |
| 55471573 | 55479327 loss |
| 70953862 | 70973349 loss |
| 75040646 | 75106666 loss |
| 58042907 | 58136773 loss |
| 58143665 | 58162003 loss |
| 55551531 | 55554673 loss |
| 63295164 | 63379949 loss |
| 65568881 | 65658663 loss |
| 56244465 | 56254515 loss |
| 56222821 | 56228867 loss |



|          |               |
|----------|---------------|
| 73762038 | 73785078 loss |
| 55725662 | 55735772 loss |
| 55186305 | 55196498 loss |
| 79826317 | 79830845 loss |
| 62226318 | 62230753 loss |
| 76354809 | 76365024 loss |
| 68334154 | 68360367 loss |
| 56503805 | 56515618 loss |
| 65271367 | 65425133 loss |
| 51511063 | 51512930 loss |
| 61984022 | 62058784 loss |
| 58341025 | 58353255 loss |
| 75536231 | 75630610 loss |
| 80037496 | 80061977 loss |
| 70930627 | 70938131 loss |
| 70009282 | 70095641 loss |
| 73637697 | 73640165 loss |
| 75154479 | 75347684 loss |
| 55082983 | 55089128 loss |
| 56109929 | 56127101 loss |
| 75484109 | 75530690 loss |
| 56384798 | 56387329 loss |
| 56380264 | 56382066 loss |
| 56568645 | 56571208 loss |
| 56636800 | 56639228 loss |
| 56660959 | 56663471 loss |
| 56678580 | 56681147 loss |
| 56700999 | 56704034 loss |
| 56645700 | 56649332 loss |
| 56276715 | 56279345 loss |
| 73909855 | 73918352 loss |
| 52504516 | 52511543 loss |
| 52914516 | 52924799 loss |
| 61403402 | 61522450 loss |
| 62371057 | 62371175 loss |
| 65209493 | 65209578 loss |
| 62250863 | 62250947 loss |
| 62250716 | 62250809 loss |
| 78591179 | 78591285 loss |
| 55567896 | 55567979 loss |
| 55594536 | 55594613 loss |
| 78710955 | 78711107 loss |
| 58417260 | 58417324 loss |
| 65210021 | 65210108 loss |
| 70843316 | 70843398 loss |
| 64346025 | 64346104 loss |
| 55235513 | 55235622 loss |
| 73606569 | 73606658 loss |
| 60847642 | 60847752 loss |
| 80138237 | 80138335 loss |
| 55050440 | 55060095 loss |
| 57287084 | 57316266 loss |



|          |               |
|----------|---------------|
| 58445075 | 58447582 loss |
| 55045745 | 55048587 loss |
| 64741461 | 65074740 loss |
| 60884064 | 60921207 loss |
| 64142446 | 64162790 loss |
| 79797578 | 79823457 loss |
| 49686169 | 49707398 loss |
| 55560757 | 55585444 loss |
| 55589524 | 55613386 loss |
| 58168434 | 58190406 loss |
| 79734313 | 79790475 loss |
| 49791901 | 49810706 loss |
| 52524945 | 52533163 loss |
| 56281103 | 56290743 loss |
| 68701940 | 68705794 loss |
| 68737601 | 68743061 loss |
| 63801281 | 63812362 loss |
| 56443631 | 56452780 loss |
| 55634290 | 55642974 loss |
| 69789858 | 69793597 loss |
| 69808748 | 69812715 loss |
| 71047108 | 71052891 loss |
| 56137814 | 56143028 loss |
| 73919670 | 73948049 loss |
| 70977653 | 70982378 loss |
| 76510697 | 76537186 loss |
| 60838304 | 60870215 loss |
| 56472951 | 56493573 loss |
| 80400108 | 80421737 loss |
| 53109609 | 53110721 loss |
| 53082395 | 53087136 loss |
| 53070067 | 53071077 loss |
| 53029563 | 53030602 loss |
| 53009489 | 53010446 loss |
| 52991784 | 52992726 loss |
| 52968777 | 52969719 loss |
| 52654848 | 52655784 loss |
| 54901570 | 54902600 loss |
| 50513932 | 50521616 loss |
| 50548237 | 50549243 loss |
| 50579765 | 50580771 loss |
| 50654065 | 50655175 loss |
| 50703388 | 50704354 loss |
| 50746227 | 50747262 loss |
| 50759376 | 50760312 loss |
| 50767575 | 50768547 loss |
| 50805936 | 50806893 loss |
| 50857577 | 50858558 loss |
| 50900902 | 50901946 loss |
| 50918011 | 50919005 loss |
| 50939566 | 50940508 loss |
| 50965050 | 50966115 loss |



|          |               |
|----------|---------------|
| 51012432 | 51013371 loss |
| 51033220 | 51034156 loss |
| 51044195 | 51045125 loss |
| 51072728 | 51073664 loss |
| 51092731 | 51106070 loss |
| 51134795 | 51135915 loss |
| 51153088 | 51154024 loss |
| 51237898 | 51238870 loss |
| 51261869 | 51263044 loss |
| 51272913 | 51273858 loss |
| 51300365 | 51301320 loss |
| 51330006 | 51330930 loss |
| 51355893 | 51363999 loss |
| 51689985 | 51691117 loss |
| 51535048 | 51544568 loss |
| 49277858 | 49282547 loss |
| 49288962 | 49413023 loss |
| 54980524 | 54989353 loss |
| 55512979 | 55517764 loss |
| 51427620 | 51440975 loss |
| 57194455 | 57278635 loss |
| 66424747 | 66436659 loss |
| 84843369 | 84936867 loss |
| 88864553 | 88871203 loss |
| 80166578 | 80171119 loss |
| 56159102 | 56168854 loss |
| 70564024 | 70577479 loss |
| 70240226 | 70459693 loss |
| 48740543 | 48880558 loss |
| 59895749 | 59916359 loss |
| 70857323 | 70868631 loss |
| 64479148 | 64538696 loss |
| 70772286 | 70828901 loss |
| 67530044 | 67538898 loss |
| 66019509 | 66044309 loss |
| 51563977 | 51573087 loss |
| 51575815 | 51584424 loss |
| 70838554 | 70843278 loss |
| 55494433 | 55496375 loss |
| 67634507 | 67691266 loss |
| 70617704 | 70689256 loss |
| 55126018 | 55136307 loss |
| 64712532 | 64716509 loss |
| 64723159 | 64732588 loss |
| 64694279 | 64704226 loss |
| 55244146 | 55248393 loss |
| 55232956 | 55236832 loss |
| 56197330 | 56200364 loss |
| 56206276 | 56209938 loss |
| 57341285 | 57397153 loss |
| 66772093 | 66832389 loss |
| 70097110 | 70107387 loss |



|          |               |
|----------|---------------|
| 52881433 | 52899070 loss |
| 56334713 | 56341013 loss |
| 73595308 | 73725598 loss |
| 59820064 | 59856102 loss |
| 73542591 | 73583861 loss |
| 56237002 | 56244232 loss |
| 70945057 | 70948742 loss |
| 55094936 | 55099271 loss |
| 70184796 | 70205352 loss |
| 56403831 | 56407694 loss |
| 51764676 | 51766442 loss |
| 51627425 | 51630433 loss |
| 51669191 | 51669770 loss |
| 51676457 | 51676895 loss |
| 52541834 | 52542448 loss |
| 51715674 | 51725826 loss |
| 51748742 | 51750796 loss |
| 51658133 | 51661542 loss |
| 62950941 | 62991829 loss |
| 57021533 | 57143868 loss |
| 56210626 | 56222508 loss |
| 64611267 | 64652343 loss |
| 52730577 | 52781014 loss |
| 51427121 | 51427446 loss |
| 61757293 | 61859530 loss |
| 52930855 | 52948345 loss |
| 58417025 | 58423817 loss |
| 66538231 | 66572581 loss |
| 66285239 | 66363780 loss |
| 56516121 | 56519069 loss |
| 76932618 | 76956696 loss |
| 63282503 | 63311080 loss |
| 60020847 | 60059714 loss |
| 70920748 | 70923888 loss |
| 61837951 | 61877327 loss |
| 60244117 | 60250497 loss |
| 75855788 | 75925948 loss |
| 55525563 | 55531969 loss |
| 76161805 | 76186844 loss |
| 69859907 | 69903160 loss |
| 49918194 | 50145512 loss |
| 70703273 | 70751231 loss |
| 52513284 | 52516420 loss |
| 54989127 | 55036536 loss |
| 55341051 | 55400723 loss |
| 76247729 | 76247841 loss |
| 52829460 | 52829559 loss |
| 70580274 | 70607444 loss |
| 64562542 | 64569569 loss |
| 61253565 | 61383393 loss |
| 75982640 | 75991792 loss |
| 69647345 | 69659458 loss |



|          |               |
|----------|---------------|
| 66963211 | 66980517 loss |
| 73952592 | 73995949 loss |
| 79987497 | 80029562 loss |
| 52780093 | 52816914 loss |
| 64111183 | 64127929 loss |
| 87816389 | 87945315 loss |
| 51443735 | 51490229 loss |
| 56318845 | 56332329 loss |
| 55713620 | 55717832 loss |
| 56297917 | 56300654 loss |
| 50980176 | 50983338 loss |
| 56254802 | 56262643 loss |
| 51545744 | 51550524 loss |
| 70167278 | 70184218 loss |
| 61582670 | 61656824 loss |
| 78677252 | 78707850 loss |
| 52898820 | 52915184 loss |
| 52538435 | 52540375 loss |
| 76245062 | 76248110 loss |
| 76245137 | 76248105 loss |
| 62217062 | 62224782 loss |
| 66915861 | 66930261 loss |
| 76815627 | 76907573 loss |
| 56269128 | 56271369 loss |
| 51385089 | 51405193 loss |
| 52030675 | 52038557 loss |
| 52071636 | 52080968 loss |
| 79859743 | 79881075 loss |
| 63456526 | 63575723 loss |
| 64225366 | 64439247 loss |
| 58201107 | 58283793 loss |
| 71054052 | 71166435 loss |
| 75684179 | 75744233 loss |
| 58451538 | 58509099 loss |
| 55680495 | 55710885 loss |
| 55691927 | 55694711 loss |
| 52625751 | 52640408 loss |
| 65977512 | 66017767 loss |
| 79612161 | 79647174 loss |
| 57506631 | 57581416 loss |
| 57409424 | 57430553 loss |
| 49846033 | 49865103 loss |
| 49918194 | 50145512 loss |
| 50513932 | 50521616 loss |
| 51092731 | 51106070 loss |
| 51781934 | 51782693 loss |
| 51815160 | 51815598 loss |
| 67421700 | 67487437 loss |
| 80400108 | 80421737 loss |
| 84843369 | 84936867 loss |
| 90296030 | 90299254 loss |
| 93412919 | 94287951 loss |

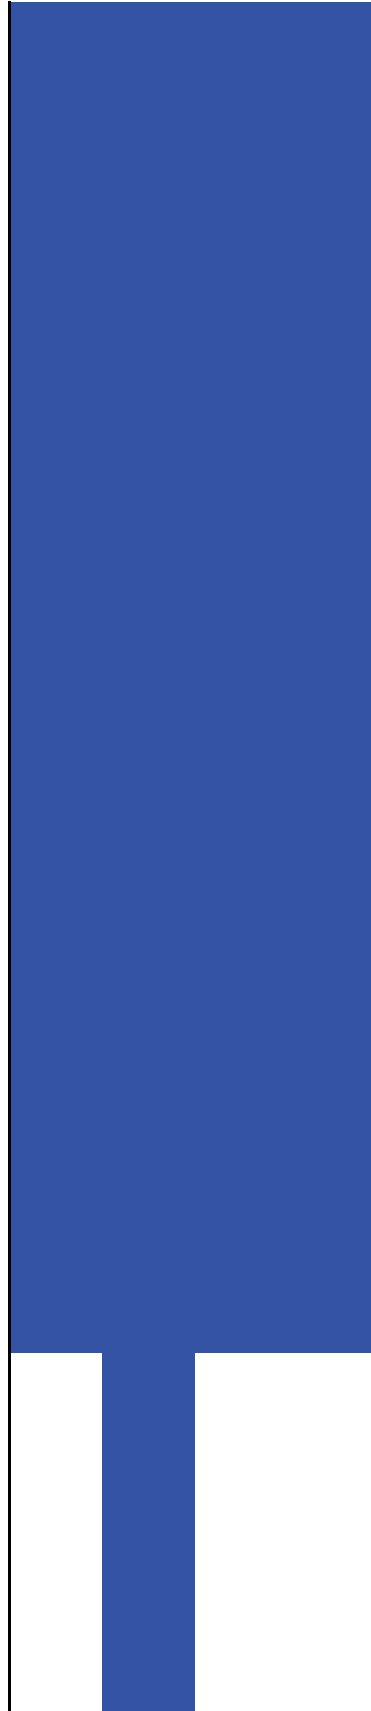



|           |                |
|-----------|----------------|
| 122629126 | 122632860 loss |
| 101596906 | 101599286 loss |
| 96280484  | 96281994 loss  |
| 99445595  | 99473326 loss  |
| 123290081 | 123312387 loss |
| 122497160 | 122506196 loss |
| 118881913 | 119076153 loss |
| 119187092 | 119273747 loss |
| 103469432 | 103476847 loss |
| 122580915 | 122801456 loss |
| 102032982 | 102039688 loss |
| 105038363 | 105366000 loss |
| 98186065  | 98568762 loss  |
| 118412011 | 118451468 loss |
| 99475852  | 99498989 loss  |
| 119337153 | 119380924 loss |
| 121941260 | 122097639 loss |
| 119274741 | 119322389 loss |
| 104213842 | 104242913 loss |
| 121434795 | 121682948 loss |
| 103479455 | 103498726 loss |
| 124377512 | 124591768 loss |
| 122834075 | 122850337 loss |
| 118666379 | 118666992 loss |
| 115491436 | 116924414 loss |
| 117324536 | 118378751 loss |
| 122310655 | 122314996 loss |
| 118536348 | 118563454 loss |
| 122351552 | 122364415 loss |
| 119537486 | 120269037 loss |
| 121310415 | 121347266 loss |
| 103446228 | 103455790 loss |
| 124059361 | 124373301 loss |
| 103375797 | 103381854 loss |
| 100269861 | 100549015 loss |
| 99697909  | 99712628 loss  |
| 96504483  | 96918253 loss  |
| 102129144 | 102333910 loss |
| 120674890 | 120830920 loss |
| 115442892 | 115442976 loss |
| 115443611 | 115445950 loss |
| 115443072 | 115443168 loss |
| 115443221 | 115443303 loss |
| 115443526 | 115443613 loss |
| 115443378 | 115443485 loss |
| 115443648 | 115443728 loss |
| 103512627 | 103746017 loss |
| 99433762  | 99445355 loss  |
| 123675862 | 124026366 loss |
| 105657889 | 105708515 loss |
| 120418806 | 120441657 loss |
| 122933549 | 123289166 loss |

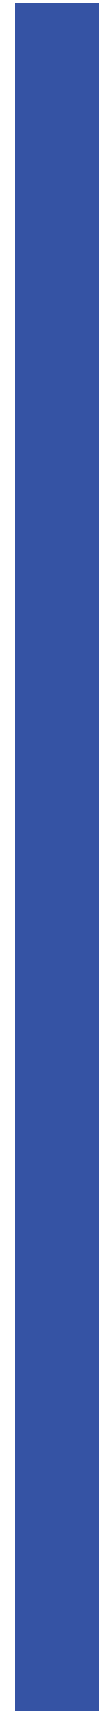

|           |           |      |
|-----------|-----------|------|
| 93412919  | 94287951  | loss |
| 99498651  | 99579658  | loss |
| 104861540 | 104867216 | loss |
| 120877682 | 120906414 | loss |
| 105513735 | 105576544 | loss |
| 104876750 | 104921883 | loss |
| 103912557 | 104012563 | loss |
| 104049459 | 104104016 | loss |
| 121858842 | 121904476 | loss |
| 109309205 | 109313456 | loss |
| 112074336 | 112082357 | loss |
| 111147799 | 111154371 | loss |
| 118632455 | 118636252 | loss |
| 106291163 | 106296036 | loss |
| 121685562 | 121778452 | loss |
| 101841576 | 102008408 | loss |
| 118511132 | 118531987 | loss |
| 122433895 | 122437644 | loss |
| 122506303 | 122558825 | loss |
| 123318196 | 123382483 | loss |
| 106505414 | 106508497 | loss |
| 122277827 | 122420257 | loss |
| 102053183 | 102095342 | loss |
| 119384206 | 119498656 | loss |
| 122874605 | 122879550 | loss |
| 122858381 | 122864880 | loss |
| 90296030  | 90299254  | loss |
| 93412919  | 94287951  | loss |
| 96504483  | 96918253  | loss |
| 98186065  | 98568762  | loss |
| 100269861 | 100549015 | loss |
| 101596906 | 101599286 | loss |
| 112074336 | 112082357 | loss |
| 115442892 | 115442976 | loss |
| 115491436 | 116924414 | loss |
| 5183403   | 5193682   | gain |
| 6249788   | 6390709   | gain |
| 5183403   | 5193682   | gain |
| 6249788   | 6390709   | gain |
| 8119105   | 8221158   | gain |
| 8119105   | 8221158   | gain |
| 16707855  | 16786532  | gain |
| 18750083  | 18943989  | gain |
| 16707855  | 16786532  | gain |
| 18750083  | 18943989  | gain |
| 22966217  | 23404173  | gain |
| 77355296  | 77363745  | gain |
| 82064205  | 82074766  | gain |
| 82086452  | 82091183  | gain |
| 82064205  | 82074766  | gain |
| 82086452  | 82091183  | gain |
| 91503654  | 91646555  | gain |

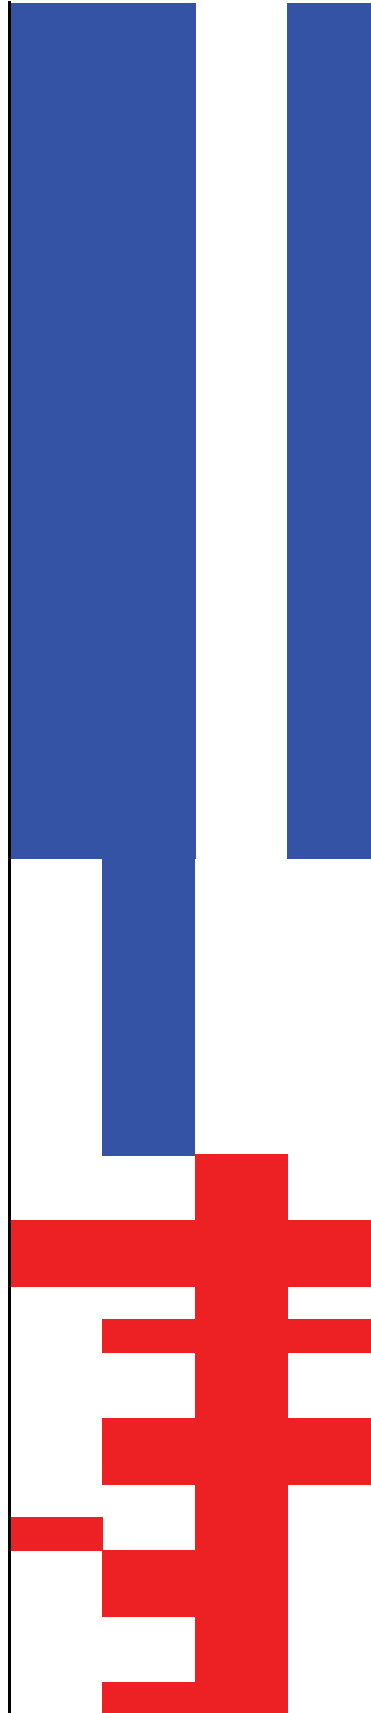

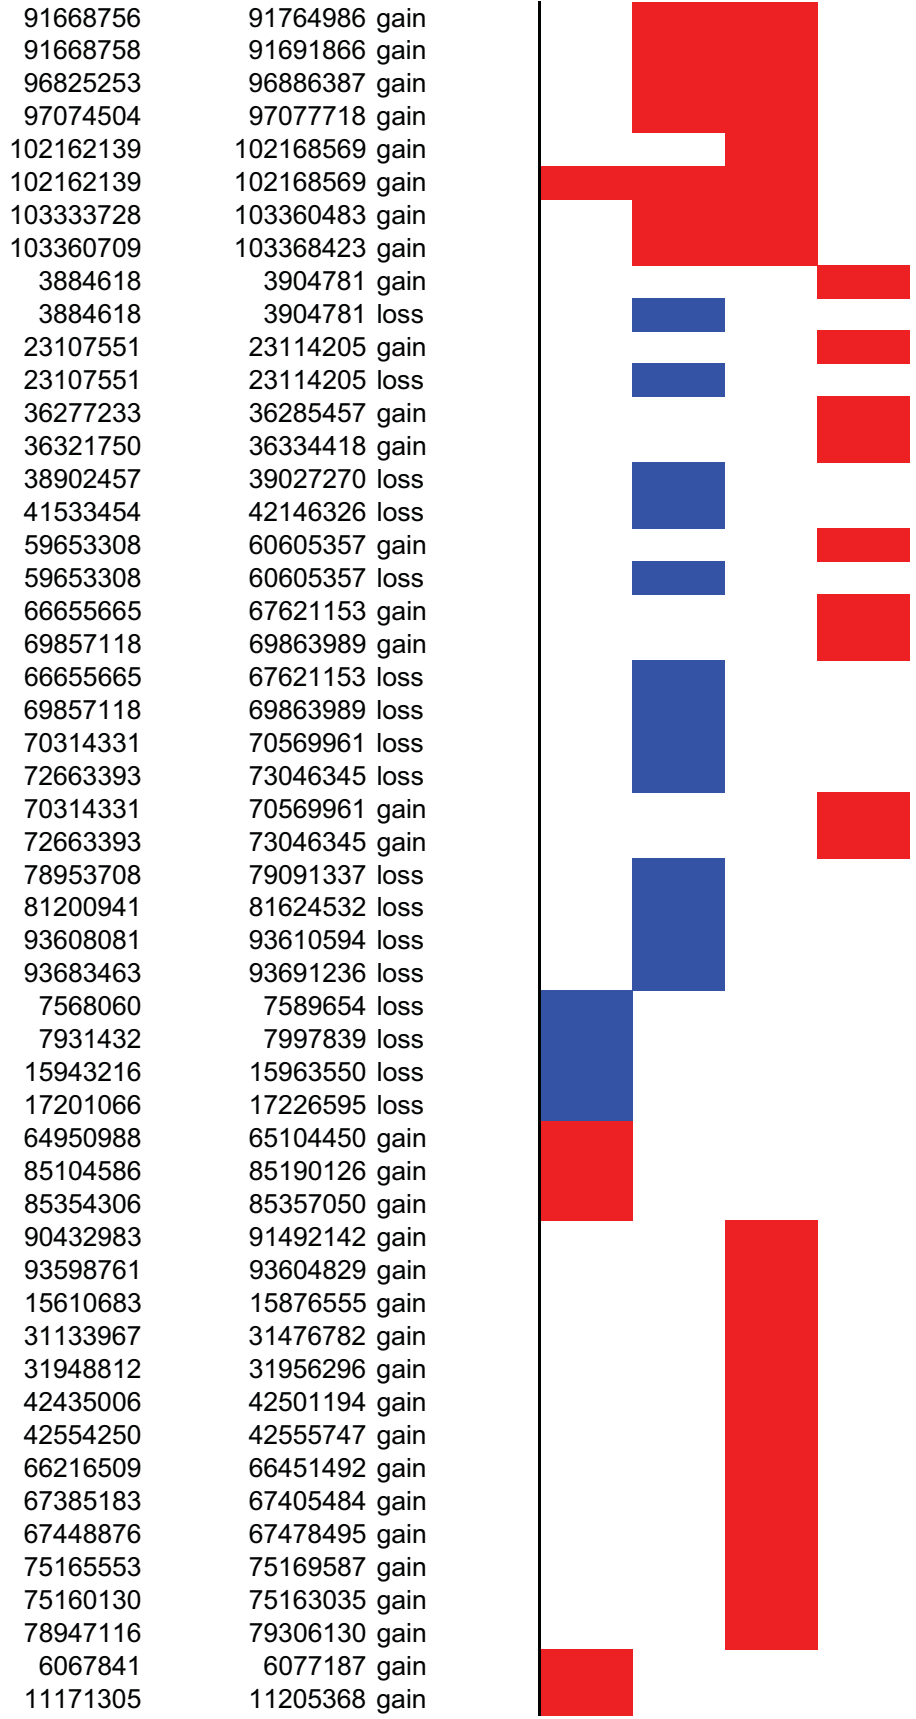

|          |               |
|----------|---------------|
| 6996915  | 6999870 gain  |
| 5502768  | 5503787 gain  |
| 11214172 | 11239810 gain |
| 8815207  | 8815715 gain  |
| 6184409  | 6224219 gain  |
| 10278691 | 10282314 gain |
| 8963392  | 8965230 gain  |
| 3708332  | 3717881 gain  |
| 4496787  | 4498583 gain  |
| 7492114  | 7500394 gain  |
| 5406873  | 5422847 gain  |
| 10548746 | 10557387 gain |
| 8962876  | 8963260 gain  |
| 10815436 | 10860533 gain |
| 7938878  | 8040517 gain  |
| 8954503  | 8955423 gain  |
| 5425143  | 5427316 gain  |
| 7430953  | 7457516 gain  |
| 11122101 | 11125056 gain |
| 4861222  | 4877884 gain  |
| 3986660  | 3990005 gain  |
| 4286000  | 4305955 gain  |
| 9063773  | 9151409 gain  |
| 4114445  | 4125827 gain  |
| 3913490  | 3929716 gain  |
| 3972327  | 3981665 gain  |
| 4270179  | 4283137 gain  |
| 6134388  | 6141137 gain  |
| 9186208  | 9210056 gain  |
| 6241667  | 6262304 gain  |
| 7568529  | 7613099 gain  |
| 8994882  | 9001726 gain  |
| 5038825  | 5041134 gain  |
| 7856472  | 7877157 gain  |
| 4057486  | 4059294 gain  |
| 6080037  | 6080785 gain  |
| 7016344  | 7026383 gain  |
| 5364639  | 5366347 gain  |
| 6164457  | 6172475 gain  |
| 4886881  | 4906627 gain  |
| 10059661 | 10076123 gain |
| 5041403  | 5049917 gain  |
| 8911956  | 8923173 gain  |
| 8410112  | 8479595 gain  |
| 4082487  | 4087339 gain  |
| 4135422  | 4139609 gain  |
| 5988544  | 6015825 gain  |
| 4164323  | 4175479 gain  |
| 5335740  | 5344153 gain  |
| 5453162  | 5457549 gain  |
| 11015970 | 11023756 gain |
| 4839365  | 4842528 gain  |

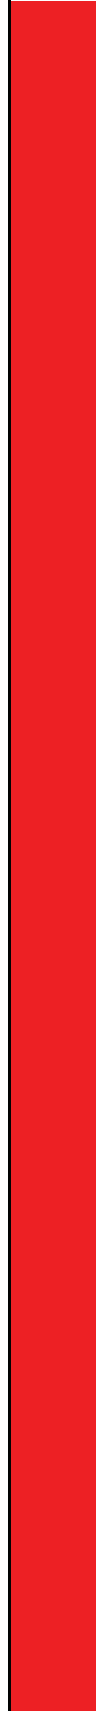

|          |               |
|----------|---------------|
| 6919112  | 6932701 gain  |
| 4825365  | 4839322 gain  |
| 5068077  | 5070639 gain  |
| 10792632 | 10813464 gain |
| 10863828 | 10904548 gain |
| 6306456  | 6325652 gain  |
| 5917555  | 5924816 gain  |
| 6085096  | 6091773 gain  |
| 4097350  | 4099017 gain  |
| 5490454  | 5494031 gain  |
| 3851772  | 3867549 gain  |
| 8738494  | 8758092 gain  |
| 4214391  | 4222615 gain  |
| 5092870  | 5098418 gain  |
| 4148662  | 4154035 gain  |
| 7289647  | 7292106 gain  |
| 10599733 | 10622225 gain |
| 3323300  | 3385733 gain  |
| 5344704  | 5349574 gain  |
| 4855128  | 4860912 gain  |
| 5465239  | 5468498 gain  |
| 10652212 | 10664320 gain |
| 5388335  | 5390069 gain  |
| 8234657  | 8293329 gain  |
| 10319754 | 10379367 gain |
| 10666686 | 10678748 gain |
| 10680114 | 10704311 gain |
| 7062400  | 7066762 gain  |
| 4003384  | 4007005 gain  |
| 5897134  | 5912866 gain  |
| 4907228  | 4928287 gain  |
| 5422823  | 5424916 gain  |
| 9041530  | 9052670 gain  |
| 5474734  | 5481854 gain  |
| 5707373  | 5726317 gain  |
| 6276895  | 6300096 gain  |
| 5366812  | 5371511 gain  |
| 9004183  | 9016072 gain  |
| 6985466  | 6996298 gain  |
| 10257377 | 10271362 gain |
| 10138653 | 10175993 gain |
| 10116037 | 10134161 gain |
| 5728086  | 5729666 gain  |
| 6057887  | 6059524 gain  |
| 10273628 | 10278433 gain |
| 7073447  | 7093959 gain  |
| 5460693  | 5464994 gain  |
| 7052228  | 7054951 gain  |
| 7166501  | 7180219 gain  |
| 5447697  | 5455938 gain  |
| 5850973  | 5875208 gain  |
| 10057192 | 10059582 gain |



|          |               |
|----------|---------------|
| 3409916  | 3414457 gain  |
| 5298330  | 5308739 gain  |
| 8972600  | 8991155 gain  |
| 8848974  | 8851452 gain  |
| 8136698  | 8206472 gain  |
| 5568073  | 5571261 gain  |
| 10282760 | 10315238 gain |
| 8911418  | 8913736 gain  |
| 6226400  | 6227768 gain  |
| 7012559  | 7015683 gain  |
| 4139798  | 4145740 gain  |
| 11011649 | 11017001 gain |
| 4035410  | 4037912 gain  |
| 4040287  | 4042221 gain  |
| 8893890  | 8908632 gain  |
| 7687058  | 7713728 gain  |
| 3259075  | 3283010 gain  |
| 9946786  | 9974023 gain  |
| 8967476  | 8972380 gain  |
| 5603013  | 5609707 gain  |
| 7000179  | 7009005 gain  |
| 5704475  | 5707101 gain  |
| 4316146  | 4397077 gain  |
| 5107745  | 5118408 gain  |
| 7671150  | 7681666 gain  |
| 4611783  | 4615667 gain  |
| 3584824  | 3686564 gain  |
| 10529860 | 10531937 gain |
| 8925274  | 8928399 gain  |
| 5740903  | 5758532 gain  |
| 7131257  | 7272552 gain  |
| 5795689  | 5802671 gain  |
| 5689130  | 5702864 gain  |
| 6341249  | 6353527 gain  |
| 7349885  | 7369927 gain  |
| 6334978  | 6340894 gain  |
| 6264843  | 6264932 gain  |
| 6264642  | 6264728 gain  |
| 4962305  | 4966995 gain  |
| 3283046  | 3292837 gain  |
| 6053629  | 6057751 gain  |
| 11036784 | 11049160 gain |
| 11243907 | 11271213 gain |
| 11052796 | 11067740 gain |
| 11141960 | 11155593 gain |
| 9016409  | 9026790 gain  |
| 3388868  | 3398168 gain  |
| 5482839  | 5488336 gain  |
| 7300157  | 7315712 gain  |
| 6105797  | 6115555 gain  |
| 3908869  | 3912717 gain  |
| 4007504  | 4012725 gain  |



|          |               |
|----------|---------------|
| 5842301  | 5845478 gain  |
| 4984354  | 4989971 gain  |
| 6428015  | 6533217 gain  |
| 7067508  | 7070527 gain  |
| 4000579  | 4002102 gain  |
| 8831592  | 8845400 gain  |
| 7272695  | 7280774 gain  |
| 5549136  | 5560575 gain  |
| 5133684  | 5273119 gain  |
| 5664634  | 5688908 gain  |
| 4510471  | 4621752 gain  |
| 4931854  | 4943092 gain  |
| 10743446 | 10752561 gain |
| 4100116  | 4113965 gain  |
| 7631948  | 7663035 gain  |
| 7028202  | 7044242 gain  |
| 5940542  | 5964206 gain  |
| 4231898  | 4233634 gain  |
| 8867618  | 8873047 gain  |
| 4192173  | 4195419 gain  |
| 7049537  | 7051814 gain  |
| 6227766  | 6235840 gain  |
| 3454927  | 3575749 gain  |
| 6981308  | 6984135 gain  |
| 10969781 | 10980021 gain |
| 4154645  | 4156710 gain  |
| 6384428  | 6398459 gain  |
| 5099206  | 5106996 gain  |
| 10092717 | 10110076 gain |
| 4195197  | 4201603 gain  |
| 6400582  | 6415216 gain  |
| 4800924  | 4811634 gain  |
| 4784292  | 4793877 gain  |
| 4756524  | 4765940 gain  |
| 4622550  | 4625617 gain  |
| 7344253  | 7349715 gain  |
| 5637489  | 5648130 gain  |
| 4425456  | 4439424 gain  |
| 5050807  | 5057071 gain  |
| 5601872  | 5602959 gain  |
| 9001871  | 9003846 gain  |
| 6903573  | 6915091 gain  |
| 4156976  | 4163245 gain  |
| 7500390  | 7557779 gain  |
| 6116003  | 6118586 gain  |
| 5377522  | 5388703 gain  |
| 9158131  | 9162446 gain  |
| 5758426  | 5771401 gain  |
| 10575001 | 10599699 gain |
| 6363689  | 6378038 gain  |
| 5273920  | 5295455 gain  |
| 5651184  | 5663707 gain  |



|          |               |
|----------|---------------|
| 10917033 | 10932405 gain |
| 6535855  | 6543070 gain  |
| 7747565  | 7785800 gain  |
| 5970233  | 5986143 gain  |
| 8692485  | 8702789 gain  |
| 8665743  | 8686325 gain  |
| 5878465  | 5885768 gain  |
| 5024005  | 5031972 gain  |
| 8781371  | 8797859 gain  |
| 8797976  | 8800816 gain  |
| 8800355  | 8800481 gain  |
| 6119403  | 6128215 gain  |
| 5495277  | 5510489 gain  |
| 4711222  | 4752352 gain  |
| 4261667  | 4269172 gain  |
| 5730305  | 5731721 gain  |
| 7095185  | 7114516 gain  |
| 8816292  | 8830132 gain  |
| 3767420  | 3808829 gain  |
| 4445907  | 4477143 gain  |
| 10463579 | 10527671 gain |
| 6047144  | 6053718 gain  |
| 8848843  | 8860907 gain  |
| 4184356  | 4191047 gain  |
| 3992751  | 3999512 gain  |
| 3896049  | 3907133 gain  |
| 5891137  | 5894107 gain  |
| 6062820  | 6067850 gain  |
| 10945151 | 10956233 gain |
| 10932318 | 10944269 gain |
| 4125959  | 4132307 gain  |
| 10645374 | 10651587 gain |
| 5079336  | 5085477 gain  |
| 8847011  | 8848957 gain  |
| 10624955 | 10630728 gain |
| 8845485  | 8846965 gain  |
| 6984187  | 6985516 gain  |
| 7070620  | 7073536 gain  |
| 8883564  | 8893784 gain  |
| 9028339  | 9040700 gain  |
| 8946048  | 8950146 gain  |
| 3935185  | 3949340 gain  |
| 7056961  | 7062141 gain  |
| 10763304 | 10788909 gain |
| 10708722 | 10739700 gain |
| 8810328  | 8815114 gain  |
| 5088552  | 5092856 gain  |
| 8877019  | 8879344 gain  |
| 4878667  | 4885397 gain  |
| 6080762  | 6084891 gain  |
| 6061206  | 6062468 gain  |
| 10988786 | 10995091 gain |





|          |               |
|----------|---------------|
| 12660357 | 12671056 gain |
| 16030262 | 16059479 gain |
| 12838017 | 12840122 gain |
| 12540825 | 12576486 gain |
| 12648014 | 12664186 gain |
| 11822048 | 11837937 gain |
| 12707797 | 12726227 gain |
| 12674505 | 12702106 gain |
| 11566527 | 11587067 gain |
| 11771544 | 11786348 gain |
| 12770279 | 12794386 gain |
| 12873098 | 12908298 gain |
| 12535268 | 12539775 gain |
| 11844904 | 11849436 gain |
| 11325092 | 11340641 gain |
| 11691682 | 11698133 gain |
| 11703986 | 11715324 gain |
| 11518047 | 11538038 gain |
| 11482150 | 11501736 gain |
| 11611338 | 11632956 gain |
| 11348355 | 11358303 gain |
| 11593048 | 11604893 gain |
| 11543857 | 11547226 gain |
| 11661095 | 11679294 gain |
| 11395902 | 11410606 gain |
| 11902566 | 11903514 gain |
| 11929484 | 11930441 gain |
| 11944672 | 11945704 gain |
| 11970512 | 11971442 gain |
| 12110297 | 12111230 gain |
| 12133298 | 12134240 gain |
| 12148184 | 12149120 gain |
| 12162099 | 12166337 gain |
| 12173191 | 12174127 gain |
| 12183089 | 12184034 gain |
| 12284057 | 12284996 gain |
| 12357539 | 12358478 gain |
| 12357539 | 12358478 gain |
| 12372672 | 12373620 gain |
| 12396376 | 12397315 gain |
| 12468754 | 12469702 gain |
| 12496800 | 12497757 gain |
| 12748668 | 12749733 gain |
| 12752655 | 12758335 gain |
| 12936266 | 12937226 gain |
| 12958372 | 12959317 gain |
| 12964138 | 12965065 gain |
| 12975338 | 12976268 gain |
| 12993852 | 12994797 gain |
| 13009229 | 13010174 gain |
| 13028080 | 13029058 gain |
| 13073477 | 13074410 gain |



|          |               |
|----------|---------------|
| 13101893 | 13102817 gain |
| 13137902 | 13138826 gain |
| 13169182 | 13170136 gain |
| 13220223 | 13221147 gain |
| 13239505 | 13240444 gain |
| 13265158 | 13266082 gain |
| 13308741 | 13309674 gain |
| 13387849 | 13388773 gain |
| 13416249 | 13417182 gain |
| 13439119 | 13440046 gain |
| 13485060 | 13485990 gain |
| 13519503 | 13520448 gain |
| 13528060 | 13529005 gain |
| 13545461 | 13546406 gain |
| 13553741 | 13554686 gain |
| 13575035 | 13577782 gain |
| 13604164 | 13605112 gain |
| 13659795 | 13660743 gain |
| 13693653 | 13694601 gain |
| 13707602 | 13708544 gain |
| 13728935 | 13729886 gain |
| 13779318 | 13780278 gain |
| 13823597 | 13824545 gain |
| 13842833 | 13843793 gain |
| 13855037 | 13856104 gain |
| 13869154 | 13870099 gain |
| 13889133 | 13890078 gain |
| 13901948 | 13902884 gain |
| 13912713 | 13913661 gain |
| 13936284 | 13937235 gain |
| 13961750 | 13962698 gain |
| 13993511 | 13994462 gain |
| 12342721 | 12343660 gain |
| 12315210 | 12316149 gain |
| 12194210 | 12195164 gain |
| 11741949 | 11765541 gain |
| 12040333 | 12068604 gain |
| 11986888 | 12019586 gain |
| 12502394 | 12506600 gain |
| 11721773 | 11735049 gain |
| 15979621 | 15999515 gain |
| 11849607 | 11893893 gain |
| 14522561 | 14672473 gain |
| 12838017 | 12870613 gain |
| 12841428 | 12870613 gain |
| 21671802 | 21727281 gain |
| 23633249 | 23727302 gain |
| 18745269 | 18779282 gain |
| 20676471 | 20717952 gain |
| 20767442 | 20802046 gain |
| 20447923 | 20465161 gain |
| 23833365 | 24024087 gain |

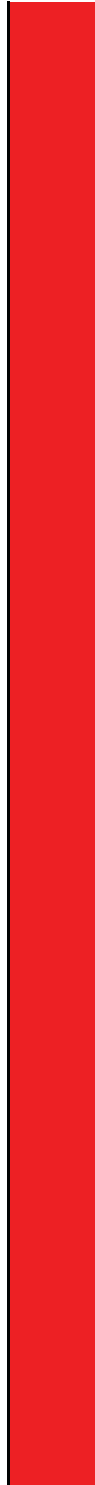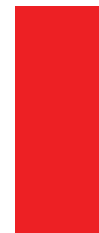

|          |               |
|----------|---------------|
| 18706505 | 18726674 gain |
| 24994405 | 25036106 gain |
| 18787725 | 18792918 gain |
| 25580195 | 25678818 gain |
| 25746900 | 25753481 gain |
| 25685026 | 25698411 gain |
| 25074018 | 25276922 gain |
| 20567204 | 20630900 gain |
| 24748497 | 24754151 gain |
| 21727798 | 21760127 gain |
| 24550268 | 24551964 gain |
| 24047239 | 24105509 gain |
| 24973454 | 24975799 gain |
| 24335942 | 24355076 gain |
| 21465796 | 21547151 gain |
| 25311691 | 25508986 gain |
| 23215715 | 23241401 gain |
| 23377098 | 23522812 gain |
| 23223920 | 23224041 gain |
| 22825094 | 22825162 gain |
| 18654853 | 18706303 gain |
| 24752750 | 24936332 gain |
| 24369285 | 24630317 gain |
| 23761889 | 23795619 gain |
| 19011057 | 19185686 gain |
| 23283221 | 23348367 gain |
| 24168991 | 24299516 gain |
| 20857947 | 21028692 gain |
| 21852831 | 21932817 gain |
| 22213606 | 23064372 gain |
| 18824472 | 18967001 gain |
| 21346767 | 21356779 gain |
| 27504526 | 27507121 gain |
| 27463191 | 27504310 gain |
| 26960414 | 26963137 gain |
| 27397108 | 27411669 gain |
| 26822892 | 26852811 gain |
| 27291509 | 27328721 gain |
| 38129531 | 38148915 gain |
| 38470469 | 38480097 gain |
| 38598686 | 38859590 gain |
| 44407815 | 44421233 loss |
| 44468939 | 44482199 loss |
| 46471407 | 46561150 loss |
| 56536126 | 56561219 loss |
| 56865452 | 56888173 loss |
| 57107753 | 57290522 loss |
| 55327858 | 55371118 loss |
| 56796861 | 56799352 loss |
| 56986843 | 57083065 loss |
| 56471618 | 56516833 loss |
| 56603650 | 56622516 loss |

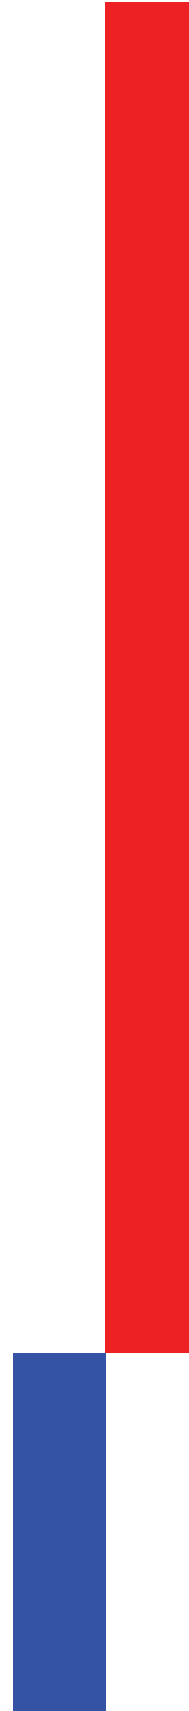



Human aCGH data from Taylor 2010 (MSKCC CancerGenomics portal)

| Human Ortholog | % human PCa with gain | % human PCa with loss |
|----------------|-----------------------|-----------------------|
| TMEM131        | 1.03%                 | 3.61%                 |
| CNGA3          | 1.03%                 | 3.61%                 |
| TMEM182        | 1.03%                 | 4.12%                 |
| C2orf67        | 2.06%                 | 5.67%                 |
| OR4C11         | 0.00%                 | 0.00%                 |
| ASIP           | 2.58%                 | 4.12%                 |
| MECOM          |                       |                       |
| ARPM1          | 7.22%                 | 0.52%                 |
| SOX2OT         |                       |                       |
| ATP11B         | 4.12%                 | 3.61%                 |
| FAT4           | 2.06%                 | 8.76%                 |
| INTU           | 2.06%                 | 9.28%                 |
| CELF3          |                       |                       |
| MRPL9          | 5.15%                 | 1.55%                 |
| RIIAD1         |                       |                       |
| SNX27          | 5.67%                 | 1.55%                 |
| LRIG2          | 1.03%                 | 6.19%                 |
| CLCA4          | 0.52%                 | 10.31%                |
| CLCA4          | 0.52%                 | 10.31%                |
| CHCHD7         | 13.40%                | 3.61%                 |
| FAM110B        | 13.40%                | 3.61%                 |
| IMPAD1         | 13.40%                | 3.09%                 |
| LYN            | 14.43%                | 3.61%                 |
| MOS            | 13.40%                | 3.61%                 |
| PENK           | 13.40%                | 3.61%                 |
| PLAG1          | 14.43%                | 3.61%                 |
| RPS20          | 13.40%                | 3.61%                 |
| SDR16C5        | 13.40%                | 3.61%                 |
| SDR16C6P       |                       |                       |
| TGS1           | 13.40%                | 3.61%                 |
| TMEM68         | 13.40%                | 3.61%                 |
| CYP7A1         | 13.40%                | 3.09%                 |
| SDCBP          | 13.40%                | 3.09%                 |
| UBXN2B         | 13.40%                | 3.09%                 |
| ASPH           | 13.92%                | 4.12%                 |
| CA8            | 13.92%                | 3.09%                 |
| CHD7           | 13.92%                | 3.09%                 |
| CLVS1          |                       |                       |
| NSMAF          | 12.37%                | 3.09%                 |
| RAB2A          | 13.92%                | 3.09%                 |
| TOX            | 12.89%                | 3.09%                 |
| CA8            | 13.92%                | 3.09%                 |
| C8orf37        | 15.46%                | 2.58%                 |

|           |        |        |
|-----------|--------|--------|
| OSGIN2    | 13.92% | 2.58%  |
| RIPK2     | 13.92% | 2.58%  |
| MMP16     | 14.43% | 2.58%  |
| KIAA0776  | 1.03%  | 28.35% |
| FUT9      | 1.03%  | 28.35% |
| EPHA7     | 0.52%  | 30.93% |
| C9orf125  | 6.19%  | 2.06%  |
| C9orf30   | 6.19%  | 1.55%  |
| ABCA1     | 5.67%  | 1.55%  |
| ALDOB     | 6.19%  | 2.06%  |
| BAAT      | 6.19%  | 2.06%  |
| CYLC2     | 6.19%  | 1.03%  |
| LPPR1     |        |        |
| ERP44     | 6.70%  | 1.55%  |
| FKTN      | 5.67%  | 1.55%  |
| FSD1L     | 5.67%  | 1.55%  |
| GRIN3A    | 6.70%  | 2.06%  |
| INVS      | 6.70%  | 1.55%  |
| MRPL50    | 6.19%  | 2.06%  |
| MURC      | 6.19%  | 2.06%  |
| NIPSNAP3B | 5.67%  | 1.55%  |
| NIPSNAP3A | 5.67%  | 1.55%  |
| OR13D1    | 5.67%  | 1.55%  |
| OR13C8    | 5.67%  | 1.55%  |
| OR13C3    | 5.67%  | 1.55%  |
| OR13F1    | 5.67%  | 1.55%  |
| PPP3R2    | 6.19%  | 2.06%  |
| RNF20     | 6.19%  | 2.06%  |
| SLC44A1   | 5.67%  | 1.55%  |
| SMC2      | 6.19%  | 1.03%  |
| TAL2      | 5.67%  | 1.55%  |
| TEX10     | 6.19%  | 1.55%  |
| TMEFF1    | 6.19%  | 2.06%  |
| TMEM38B   | 5.67%  | 1.55%  |
| ZNF189    | 6.19%  | 2.06%  |
| DMRTA1    | 2.58%  | 6.19%  |
| DOCK7     | 0.52%  | 7.22%  |
| ATG4C     | 0.52%  | 7.22%  |
| CACHD1    | 1.03%  | 7.22%  |
| AGBL4     | 1.03%  | 6.19%  |
| BEND5     | 1.03%  | 6.19%  |

LOC388630

|              |       |       |
|--------------|-------|-------|
| C1orf122     | 1.03% | 4.64% |
| C1orf190     | 0.52% | 6.70% |
| C1orf210     | 1.03% | 5.15% |
| KIAA0494     | 0.52% | 7.22% |
| LOC100129924 |       |       |
| C1orf223     |       |       |
| C1orf109     | 0.52% | 4.64% |
| C1orf50      | 1.55% | 5.67% |
| AKIRIN1      | 1.03% | 4.64% |
| AKR1A1       | 1.55% | 6.19% |
| ARTN         | 1.03% | 5.67% |
| ATP6V0B      | 1.03% | 5.67% |
| ATPAF1       | 0.52% | 7.22% |
| B4GALT2      | 1.03% | 5.67% |
| BMP8A        | 1.03% | 4.64% |
| BMP8B        | 1.03% | 4.64% |
| BTBD19       |       |       |
| CAP1         | 1.03% | 4.64% |
| CCDC163P     |       |       |
| CCDC17       | 1.55% | 6.19% |
| CCDC23       | 1.55% | 5.67% |
| CCDC24       | 1.03% | 5.67% |
| CCDC30       |       |       |
| CDC20        | 1.03% | 5.15% |
| CDCA8        | 0.52% | 4.64% |
| CITED4       | 1.03% | 4.64% |
| CLDN19       | 1.55% | 5.67% |
| CMPK1        | 2.58% | 7.73% |
| COL9A2       | 1.03% | 4.64% |
| CTPS         | 1.03% | 4.64% |
| CYP4A11      | 0.52% | 7.22% |
| CYP4A22      | 0.52% | 7.22% |
| CYP4B1       | 0.52% | 7.22% |
| CYP4X1       | 0.52% | 7.22% |
| KIAA0754     | 1.03% | 4.64% |
| DEM1         | 1.03% | 4.64% |
| DMAP1        | 1.03% | 5.67% |
| DMBX1        | 0.52% | 6.70% |
| DNALI1       | 0.52% | 5.15% |

|          |       |       |
|----------|-------|-------|
| DPH2     | 1.03% | 5.67% |
| EBNA1BP2 | 1.03% | 5.15% |
| EDN2     | 1.03% | 4.64% |
| EIF2B3   | 1.03% | 5.67% |
| ELOVL1   | 1.03% | 5.15% |
| EPHA10   | 1.03% | 4.64% |
| ERI3     | 1.03% | 6.19% |
| ERMAP    | 1.55% | 5.67% |
| FAAH     | 0.52% | 6.70% |
| FHL3     | 1.03% | 4.64% |
| FOXJ3    | 2.06% | 5.15% |
| FOXO6    |       |       |
|          |       |       |
| C1orf228 |       |       |
|          |       |       |
| GNL2     | 0.52% | 4.64% |
| GPBP1L1  | 1.55% | 6.70% |
| GUCA2A   | 2.06% | 5.15% |
| GUCA2B   | 2.06% | 5.15% |
| HECTD3   | 1.03% | 5.67% |
| HEYL     | 1.03% | 4.64% |
| HIVEP3   | 1.55% | 5.15% |
| HPCAL4   | 1.03% | 4.64% |
| HPDL     | 1.03% | 5.67% |
| HYI      | 1.03% | 5.15% |
| INPP5B   | 1.03% | 4.64% |
| IPO13    | 1.03% | 5.67% |
| IPP      | 1.55% | 6.70% |
| KCNQ4    | 1.03% | 4.64% |
| KDM4A    | 1.03% | 5.15% |
| KIF2C    | 1.03% | 5.67% |
| KLF17    | 1.03% | 5.67% |
| KNCN     | 0.52% | 7.22% |
|          |       |       |
| LEPRE1   | 1.55% | 5.67% |
| LRRC41   | 0.52% | 6.70% |
| MACF1    | 1.03% | 4.64% |
| MANEAL   | 1.03% | 4.64% |
| MAST2    | 1.55% | 6.70% |
| MEAF6    |       |       |
| MED8     | 1.03% | 5.15% |
| MFSD2A   |       |       |
|          |       |       |
|          |       |       |
| MKNK1    | 0.52% | 7.22% |
| MMACHC   | 1.55% | 6.19% |
| MOBK2C   | 0.52% | 7.22% |



|        |       |       |
|--------|-------|-------|
| MPL    | 1.03% | 5.15% |
| MTF1   | 1.03% | 4.64% |
| MUTYH  | 1.03% | 5.67% |
| MYCBP  | 1.03% | 4.64% |
| MYCL1  | 1.03% | 4.64% |
| NASP   | 1.55% | 6.19% |
| NDUFS5 | 1.03% | 4.64% |
| NFYC   | 1.03% | 4.64% |
| NSUN4  | 0.52% | 6.70% |
| NT5C1A | 1.03% | 4.64% |

|          |       |       |
|----------|-------|-------|
| OXCT2    | 1.03% | 4.64% |
| PABPC4   | 1.03% | 4.64% |
| PDZK1IP1 | 0.52% | 7.22% |
| PIK3R3   | 1.55% | 6.70% |
| PLK3     | 1.03% | 5.67% |
| POMGNT1  | 1.03% | 6.70% |
| POU3F1   | 1.03% | 4.64% |
| PPCS     | 1.55% | 5.15% |
| PPIE     | 1.03% | 4.64% |
| PPIH     | 1.55% | 5.67% |
| PPT1     | 1.03% | 4.64% |
| PRDX1    | 1.55% | 6.19% |
| PTCH2    | 1.03% | 5.67% |
| PTPRF    | 1.03% | 5.15% |
| RAD54L   | 0.52% | 6.70% |
| RHBDL2   | 1.03% | 4.64% |
| RIMKLA   | 1.55% | 5.15% |
| RIMS3    | 1.03% | 4.64% |
| RLF      | 1.03% | 4.64% |
| RNF220   | 1.03% | 6.19% |
| RPS8     | 1.03% | 5.67% |
| RRAGC    | 1.03% | 4.64% |
| RSPO1    | 0.52% | 4.64% |
| SCMH1    | 1.03% | 4.64% |
| SF3A3    | 1.03% | 4.64% |
| SLC2A1   | 1.55% | 5.67% |
| SLC6A9   | 1.03% | 5.67% |
| SLFN1    | 1.03% | 4.64% |

|           |       |       |
|-----------|-------|-------|
| SMAP2     | 1.03% | 4.64% |
| SNIP1     | 0.52% | 5.15% |
| SNORD38A  |       |       |
| SNORD55   |       |       |
| ST3GAL3   | 1.03% | 5.67% |
| STIL      | 2.06% | 7.73% |
| KIAA0467  | 1.03% | 5.15% |
| TAL1      | 0.52% | 7.22% |
| TCTEX1D4  | 1.03% | 5.67% |
| TESK2     | 1.55% | 5.67% |
| TIE1      | 1.03% | 5.15% |
| TMCO2     | 1.03% | 4.64% |
| TMEM125   | 1.03% | 5.15% |
| TMEM53    | 1.03% | 5.67% |
| TMEM69    | 1.55% | 6.70% |
| TOE1      | 1.03% | 5.67% |
| TRIT1     | 1.03% | 4.64% |
| TSPAN1    | 1.03% | 6.70% |
| UQCRHL    |       |       |
| UROD      | 1.03% | 5.67% |
| UTP11L    | 1.03% | 4.64% |
| WDR65     | 1.03% | 5.15% |
| YBX1      | 1.55% | 5.67% |
| YRDC      | 1.03% | 4.64% |
| ZC3H12A   | 0.52% | 5.15% |
| ZNF642    | 1.03% | 4.64% |
| ZNF691    | 1.55% | 5.67% |
| ZMPSTE24  | 1.03% | 4.64% |
| ZMYND12   | 1.55% | 5.15% |
| ZSWIM5    | 1.03% | 5.67% |
| CCDC30    |       |       |
| INPP5B    | 1.03% | 4.64% |
| MTF1      | 1.03% | 4.64% |
| YARS      | 1.03% | 5.15% |
| YARS      | 1.03% | 5.15% |
| IL28RA    | 0.52% | 5.67% |
| IL28RA    | 0.52% | 5.67% |
| TCEB3     | 0.52% | 5.67% |
| RPL11     | 0.52% | 5.67% |
| LOC729059 |       |       |
| ASAP3     | 0.52% | 6.19% |
| E2F2      | 0.52% | 5.67% |
| EPHB2     | 0.52% | 5.67% |
| HNRNPR    | 0.52% | 6.19% |
| HTR1D     | 0.52% | 6.19% |
| ID3       | 0.52% | 5.67% |
| KDM1A     |       |       |
| LUZP1     | 0.52% | 6.19% |
| RPL11     | 0.52% | 5.67% |
| TCEA3     | 0.52% | 6.19% |
| ZNF436    | 0.52% | 6.19% |
| HSPG2     | 0.52% | 5.67% |

|          |       |       |
|----------|-------|-------|
| PLA2G2D  | 0.52% | 6.19% |
| PADI1    | 0.52% | 8.25% |
| PADI3    | 0.52% | 8.25% |
| PADI1    | 0.52% | 8.25% |
| PADI3    | 0.52% | 8.25% |
| NECAP2   | 0.52% | 6.70% |
| NECAP2   | 0.52% | 6.70% |
| EPHA2    | 1.03% | 5.67% |
| C1orf158 | 0.52% | 6.19% |
| AADA3L3  | 0.52% | 6.19% |
| DHRS3    | 0.52% | 6.19% |
| TNFRSF1B | 0.52% | 6.19% |
| TNFRSF8  | 0.52% | 6.19% |
| VPS13D   | 0.52% | 6.19% |
| KIAA2013 | 0.52% | 6.19% |
| C1orf187 | 0.52% | 6.70% |
| AGTRAP   | 0.52% | 6.70% |
| CLCN6    | 0.52% | 6.19% |
| FBXO44   | 0.52% | 6.70% |
| FBXO6    | 0.52% | 6.70% |
| MAD2L2   | 0.52% | 6.70% |
| MFN2     | 0.52% | 6.19% |
| MTHFR    | 0.52% | 6.19% |
| NPPA     | 0.52% | 6.19% |
| NPPB     | 0.52% | 6.19% |
| PLOD1    | 0.52% | 6.19% |
| ANGPTL7  | 0.52% | 6.70% |
| MTOR     |       |       |
| ARHGEF16 | 0.52% | 4.12% |
| MMEL1    | 1.03% | 4.12% |
| FAM114A1 | 0.00% | 8.25% |
| KLHL5    | 0.52% | 9.28% |
| FAM114A1 | 0.00% | 8.25% |
| KLHL5    | 0.52% | 9.28% |
|          |       |       |
| ZNF862   | 9.28% | 2.58% |
| TMTC1    | 2.58% | 6.70% |
| IPO8     | 3.61% | 5.67% |
| C12orf35 | 4.12% | 5.15% |
| METTTL20 |       |       |
| AMN1     | 4.12% | 5.15% |
| BICD1    | 2.58% | 7.22% |
| DENND5B  | 4.12% | 5.15% |
| FAM60A   | 4.12% | 5.15% |
| CCDC81   | 2.58% | 1.03% |
| CCDC83   | 2.58% | 1.03% |
| CCDC89   | 2.58% | 1.03% |
| CREBZF   | 2.58% | 1.03% |
| DLG2     | 2.58% | 1.55% |

|          |       |        |
|----------|-------|--------|
| EED      | 2.58% | 1.03%  |
| FZD4     | 2.58% | 1.03%  |
| ME3      | 2.58% | 1.03%  |
| PICALM   | 2.58% | 1.03%  |
| PRSS23   | 2.58% | 1.03%  |
| SYTL2    | 2.58% | 1.03%  |
| TMEM126A | 2.58% | 1.03%  |
| TMEM126B | 2.58% | 1.03%  |
| TMEM135  | 2.58% | 1.03%  |
| C11orf73 | 2.58% | 1.03%  |
| LARGE    | 0.00% | 9.28%  |
| ISX      | 0.00% | 8.76%  |
| SMARCA5  | 1.55% | 3.61%  |
| GAB1     | 2.06% | 3.61%  |
| KIAA0182 | 0.52% | 30.41% |
| FAT3     | 2.58% | 1.55%  |
| CHORDC1  | 3.09% | 1.03%  |
| KIRREL3  | 1.03% | 3.09%  |
| THSD4    | 1.55% | 6.70%  |
| LRRC49   | 1.55% | 5.67%  |
| MAP2K1   | 1.55% | 6.70%  |
| DENND4A  | 1.55% | 6.70%  |
| MNS1     | 1.03% | 8.25%  |
| IMPG1    | 0.52% | 15.98% |
| HTR1B    | 0.52% | 17.53% |
| PLOD2    | 5.15% | 0.00%  |
| C3orf58  | 5.15% | 0.00%  |
| SLC9A9   | 5.67% | 0.52%  |
| EPHB1    | 5.15% | 0.00%  |
| TMEM108  | 5.15% | 0.00%  |
| RBMS3    | 3.09% | 3.61%  |
| SLC22A14 | 4.12% | 2.06%  |
| TGM4     | 3.09% | 2.58%  |
| SGK1     | 1.55% | 5.67%  |
| SGK1     | 1.55% | 5.67%  |
| C22orf13 | 0.52% | 9.79%  |
| C12orf73 |       |        |
| C12orf75 |       |        |
| C19orf24 | 0.52% | 6.70%  |
| C12orf50 | 2.06% | 1.55%  |
| C6orf203 | 0.52% | 27.84% |

|           |       |        |
|-----------|-------|--------|
| C6orf225  | 1.03% | 24.23% |
| C21orf56  | 2.58% | 5.15%  |
| C10orf107 | 2.58% | 5.15%  |
| C12orf42  | 2.58% | 1.55%  |
| C21orf70  | 2.58% | 5.67%  |
| C21orf2   | 2.58% | 5.67%  |
| KIAA1919  | 1.03% | 24.23% |
| LOC285733 |       |        |
| C10orf35  | 3.61% | 4.12%  |
| C19orf77  |       |        |
| C19orf25  | 1.03% | 6.70%  |
| M1        |       |        |
| C6orf58   | 1.55% | 10.82% |
| KIAA1279  | 4.64% | 4.64%  |
| C19orf29  | 0.00% | 4.64%  |
| C21orf58  | 2.58% | 5.15%  |
| SPPL2B    | 0.52% | 6.19%  |
| C10orf54  | 3.09% | 3.61%  |
| C12orf12  | 2.06% | 1.55%  |
| C19orf71  |       |        |
| C12orf29  | 2.06% | 1.55%  |
| C12orf48  | 2.58% | 1.55%  |
| LOC144486 |       |        |
| KIAA0408  | 1.55% | 10.82% |
| C6orf186  |       |        |
| C19orf21  | 0.52% | 5.67%  |
| KIAA1033  | 2.06% | 1.03%  |
| C12orf23  | 2.58% | 2.06%  |
| C22orf36  | 0.52% | 9.79%  |
| ZNF878    |       |        |
| ABCA7     | 0.52% | 5.67%  |
| ACSS3     | 2.06% | 2.06%  |

|          |       |        |
|----------|-------|--------|
| ACTR6    | 3.09% | 1.55%  |
| ADAMTS14 | 3.09% | 4.12%  |
| ADAMTSL5 | 0.52% | 6.70%  |
| ADARB1   | 2.58% | 5.15%  |
| ADAT3    | 0.52% | 6.70%  |
| ADO      | 3.09% | 5.15%  |
| ADORA2A  | 0.52% | 9.79%  |
| AES      | 0.52% | 5.15%  |
| AGPAT3   | 2.58% | 5.67%  |
| AIFM2    | 3.09% | 4.12%  |
| AIM1     | 0.52% | 27.84% |
| AIRE     | 2.58% | 5.67%  |
| AKAP7    | 1.03% | 6.70%  |
| ALDH1L2  | 2.06% | 1.03%  |
| ALX1     | 2.06% | 1.55%  |
| AMD1     | 1.03% | 25.26% |
| AMDHD1   | 2.58% | 1.03%  |
| AMH      | 0.52% | 6.19%  |
| ANAPC16  |       |        |
| ANK3     | 1.55% | 6.70%  |
| ANKRD24  | 0.00% | 4.64%  |
| ANKRD57  | 2.06% | 7.22%  |
| ANKS1B   | 3.61% | 1.55%  |
| ANO4     | 3.09% | 1.55%  |
| AP3D1    | 0.52% | 6.70%  |
| APAF1    | 4.12% | 1.55%  |
| APBA3    | 0.00% | 4.64%  |
| APC2     | 1.03% | 6.70%  |
| APPL2    | 2.06% | 1.03%  |
| ARHGAP18 | 1.03% | 6.70%  |
| ARID3A   | 0.52% | 5.67%  |
| ARID5B   | 2.58% | 4.64%  |
| ARL1     | 2.58% | 1.03%  |
| ARMC2    | 0.52% | 27.84% |
| ASCC1    | 3.09% | 3.61%  |
| ASCC3    | 0.52% | 28.35% |
| ASCL1    | 2.58% | 1.55%  |
| ASCL4    | 2.58% | 1.55%  |
| ASF1A    | 0.52% | 20.62% |
| ATCAY    | 0.00% | 4.64%  |
| ATG5     | 0.52% | 27.84% |
| ATOH7    | 5.67% | 5.15%  |
| ATP2B1   | 2.06% | 1.55%  |
| ATP5D    | 0.52% | 6.19%  |
| ATP8B3   | 0.52% | 6.70%  |
| ATXN7L3B |       |        |
| LPPR3    |       |        |
| GNN      |       |        |

|              |       |        |
|--------------|-------|--------|
| C12orf26     | 2.06% | 2.06%  |
| BBS10        | 3.09% | 2.58%  |
| BCR          | 0.52% | 8.76%  |
| BEND3        | 0.52% | 27.84% |
| BET3L        |       |        |
| BICC1        | 1.55% | 5.67%  |
| BPIL2        | 0.00% | 8.76%  |
| BSG          | 0.52% | 5.67%  |
| BTBD11       | 2.58% | 2.06%  |
| BTBD2        | 0.52% | 6.70%  |
| BTG1         | 2.06% | 1.03%  |
| BVES         | 0.00% | 0.00%  |
| C19orf22     | 0.52% | 5.67%  |
| C2CD4C       |       |        |
| CABIN1       | 1.03% | 10.31% |
| CAPS2        | 3.09% | 2.06%  |
| CASP14       | 1.03% | 2.58%  |
| CBARA1       | 3.09% | 3.61%  |
| CCAR1        | 4.64% | 5.15%  |
| CCDC105      | 1.03% | 2.58%  |
| CCDC109A     | 3.09% | 4.12%  |
| CCDC138      | 2.06% | 6.19%  |
| LOC100506339 |       |        |
| CCDC38       | 2.58% | 1.03%  |
| CCDC41       | 2.58% | 1.03%  |
| CCDC53       | 2.58% | 1.55%  |
| CCDC59       | 2.06% | 2.06%  |
| CCDC6        | 1.55% | 6.19%  |
| CD164        | 0.52% | 25.77% |
| CD24         |       |        |
| CDC34        | 0.52% | 5.67%  |
| CDC40        | 0.52% | 24.74% |
| CDH23        | 3.09% | 4.64%  |
| CDK1         |       |        |
| CDK17        |       |        |
| CDK19        |       |        |
| CELF5        |       |        |
| CENPW        |       |        |
| CEP290       | 2.06% | 1.55%  |
| CEP57L1      |       |        |
| CFD          | 0.52% | 5.67%  |
| CHCHD10      | 0.52% | 9.79%  |
| CHPT1        | 2.58% | 1.03%  |
| CHST11       | 2.06% | 1.03%  |
| CHST3        | 3.09% | 3.61%  |
| CIRBP        | 0.52% | 6.70%  |
| CISD1        | 1.55% | 5.67%  |
| CKAP4        | 2.58% | 1.03%  |
| CLVS2        |       |        |
| CNN2         | 0.52% | 5.67%  |
| CNOT2        | 3.61% | 1.03%  |

|          |       |        |
|----------|-------|--------|
| COL10A1  | 0.52% | 22.68% |
| COL13A1  | 3.09% | 4.64%  |
| COL18A1  | 2.58% | 5.15%  |
| COL6A1   | 2.58% | 5.15%  |
| COL6A2   | 2.58% | 5.15%  |
| CRADD    | 2.58% | 1.03%  |
| CREB3L3  | 0.00% | 4.64%  |
| CRY1     | 2.58% | 2.06%  |
| CSNK1G2  | 0.52% | 6.70%  |
| CSRP2    | 3.09% | 2.58%  |
| CSTB     | 2.58% | 5.67%  |
| CTNNA3   | 3.61% | 5.67%  |
| C21orf33 | 2.58% | 5.67%  |
| C12orf45 | 2.06% | 1.03%  |
| C22orf28 | 0.00% | 8.76%  |
| C6orf170 | 0.52% | 18.56% |
| DAPK3    | 0.00% | 4.64%  |
| DAZAP1   | 0.52% | 6.70%  |
| DCBLD1   | 0.52% | 21.65% |
| DCN      | 2.06% | 1.55%  |
| DDIT4    | 3.09% | 3.61%  |
| DDO      | 0.52% | 24.74% |
| DDT      | 0.00% | 0.00%  |
| DDX21    | 4.64% | 4.64%  |
| DDX50    | 4.64% | 4.64%  |
| DERL3    | 0.52% | 9.79%  |
| DIP2A    | 2.58% | 5.15%  |
| DIRAS1   | 0.52% | 5.15%  |
| DNA2     | 4.64% | 5.15%  |
| DNAJB12  | 3.09% | 3.61%  |
| DNAJC12  | 4.64% | 5.15%  |
| DNMT3L   | 2.58% | 5.67%  |
| DOHH     | 0.00% | 4.64%  |
| DOT1L    | 0.52% | 6.19%  |
| DRAM1    |       |        |
| DSE      | 0.52% | 22.16% |
| DUSP6    | 2.06% | 2.06%  |
| E2F7     | 3.09% | 2.58%  |
| ECHDC1   | 1.03% | 11.34% |
| EDAR     | 2.06% | 6.70%  |
| EEA1     | 2.06% | 1.03%  |
| EEF2     | 0.00% | 4.64%  |
| EFNA2    | 0.52% | 6.70%  |
| EGR2     | 3.09% | 5.15%  |
| EID3     | 2.06% | 1.03%  |
| EIF4EBP2 | 3.09% | 4.12%  |
| ELANE    | 0.52% | 5.67%  |



|          |       |        |
|----------|-------|--------|
| ELK3     | 2.58% | 1.55%  |
| EPB41L2  | 1.03% | 6.70%  |
| EPYC     | 2.06% | 1.55%  |
| C19orf28 | 0.00% | 4.64%  |
| FABP7    | 0.52% | 15.46% |
| FAM108A1 | 0.52% | 6.70%  |
| FAM13C   | 1.55% | 5.67%  |
| FAM162B  | 0.52% | 21.13% |
| FAM184A  | 0.52% | 20.62% |
| FAM26D   | 0.52% | 22.16% |
| FAM26E   | 0.52% | 22.16% |
| FAM26F   | 0.52% | 22.16% |
| FBXO7    | 0.00% | 8.76%  |
| FGD6     | 2.58% | 1.55%  |
| FGF22    | 0.52% | 5.67%  |
| FIG4     | 0.52% | 24.74% |
| FOXO3    | 0.52% | 27.84% |
| FRK      | 0.52% | 22.16% |
| FSTL3    | 0.52% | 5.67%  |
| FTCD     | 2.58% | 5.15%  |
| FYN      | 1.03% | 24.23% |
| FZR1     | 0.00% | 4.64%  |
| GADD45B  | 0.52% | 6.19%  |
| GALNT4   | 2.06% | 1.55%  |
| GAMT     | 0.52% | 6.70%  |
| GAS2L3   | 3.09% | 1.55%  |
| GCC2     | 2.06% | 6.19%  |
| GGT1     | 0.52% | 9.79%  |
| GGT5     | 0.52% | 10.31% |
| GIPC3    | 0.00% | 4.64%  |
| GJA1     | 0.52% | 18.04% |
| GLIPR1   | 3.09% | 2.58%  |
| GLIPR1L1 | 3.09% | 2.06%  |
| GLIPR1L2 | 3.09% | 2.06%  |
| GLT8D2   | 2.06% | 1.03%  |
| C19orf20 | 0.52% | 5.67%  |
| C12orf28 |       |        |

|          |       |        |
|----------|-------|--------|
| C6orf204 | 0.52% | 21.13% |
| GNA11    | 0.52% | 5.15%  |
| GNA15    | 0.52% | 5.15%  |
| GNAZ     | 0.00% | 8.76%  |
| GNG7     | 0.52% | 5.67%  |
| GNPTAB   | 2.58% | 1.55%  |
| GOPC     | 0.52% | 21.65% |
| GPR6     | 0.52% | 24.74% |
| GPRC6A   | 0.52% | 21.13% |
| GPX4     | 0.52% | 6.19%  |
| GRIK2    | 0.52% | 28.87% |
| GRIN3B   | 0.52% | 5.67%  |
| GSTT1    | 9.79% | 4.12%  |
| GSTT2    | 0.00% | 0.00%  |
| GTF3C6   | 1.03% | 24.74% |
| GZMM     | 0.52% | 5.67%  |
| H2AFY2   | 3.09% | 4.12%  |
| HACE1    | 0.52% | 25.77% |
| HAL      | 2.58% | 1.03%  |
| HCFC2    | 2.06% | 1.03%  |
| HCN2     | 0.52% | 5.67%  |
| HDAC2    | 0.52% | 23.20% |
| HDDC2    | 0.52% | 13.40% |
| HERC4    | 4.64% | 5.15%  |
| HEY2     | 1.03% | 11.86% |
| HINT3    | 1.03% | 12.37% |
| HK1      | 4.64% | 4.64%  |
| HKDC1    | 4.64% | 4.64%  |
| HMG20B   | 0.00% | 4.64%  |
| HMHA1    | 0.52% | 5.67%  |



|         |       |        |
|---------|-------|--------|
| LRRIQ1  | 2.06% | 1.55%  |
| LRRTM3  | 3.61% | 5.67%  |
| LSM7    | 0.52% | 6.19%  |
| LSS     | 2.58% | 5.15%  |
| LTA4H   | 2.58% | 1.03%  |
| LUM     | 2.06% | 1.55%  |
| MADCAM1 | 0.52% | 6.19%  |
| MAN1A1  | 0.52% | 20.10% |
| MAP2K2  | 0.00% | 4.64%  |
| MARCKS  | 0.52% | 23.20% |
| MATK    | 0.00% | 4.64%  |
| MBD3    | 0.52% | 6.70%  |
| MCM3AP  | 2.58% | 5.15%  |
| MCM9    | 0.52% | 20.62% |
| MED16   | 0.52% | 5.67%  |
| METAP2  | 2.58% | 1.55%  |
| MEX3D   | 0.52% | 6.70%  |
| MGAT4C  | 2.06% | 1.55%  |
| MICAL1  | 0.52% | 25.77% |
| MIDN    | 0.52% | 6.70%  |
| MIER2   | 0.52% | 6.19%  |
| MIF     | 0.52% | 9.79%  |
|         |       |        |
| MKNK2   | 0.52% | 6.70%  |
| MMP11   | 0.52% | 9.79%  |
| MOBKL2A | 0.52% | 6.70%  |
| MRPL42  | 2.58% | 1.03%  |
| MRPL54  | 0.00% | 4.64%  |
|         |       |        |
| MTERFD3 | 2.58% | 2.06%  |
| MUM1    | 0.52% | 6.70%  |
| MYBPC1  | 2.58% | 1.03%  |
| MYF5    | 2.06% | 2.06%  |
| MYF6    | 2.06% | 2.06%  |
| MYPN    | 5.15% | 5.67%  |
| NAP1L1  | 3.09% | 2.58%  |
| NAV3    | 2.58% | 2.06%  |
| NCLN    | 0.52% | 5.15%  |
| NCOA7   | 1.03% | 12.89% |
| NDUFA12 | 2.58% | 1.55%  |
| NDUFS7  | 0.52% | 6.70%  |
| NEDD1   | 2.58% | 1.55%  |

|         |       |        |
|---------|-------|--------|
| NEPNP   |       |        |
| NEUROG3 | 3.61% | 4.12%  |
| NFIC    | 0.00% | 5.15%  |
| NFYB    | 2.06% | 1.03%  |
| NKAIN2  | 0.52% | 15.46% |
| NODAL   | 3.09% | 4.12%  |
| NPFFR1  | 3.09% | 4.12%  |
| NR1H4   | 3.09% | 1.55%  |
| NR2C1   | 2.58% | 1.55%  |
| NR2E1   | 0.52% | 26.29% |
| NRBF2   | 3.09% | 5.15%  |
| NT5DC1  | 0.52% | 22.68% |
| NT5DC3  | 2.06% | 1.03%  |
| NTN4    | 2.58% | 1.03%  |
| NTS     | 2.06% | 1.55%  |
| NUAK1   | 2.58% | 1.55%  |
| NUDT4   | 2.58% | 1.03%  |
| NUP37   | 2.58% | 1.55%  |
| NUS1    | 0.52% | 21.65% |
| OAZ1    | 0.52% | 6.19%  |
| ODF3L2  | 0.52% | 6.19%  |
| OIT3    | 3.09% | 4.64%  |
| OR7A5   | 1.03% | 2.58%  |
| OR7C2   | 1.03% | 2.58%  |
| OR111   | 1.03% | 2.58%  |
| OR7A17  | 1.03% | 2.58%  |
| ONECUT3 | 0.52% | 6.70%  |
| OSBPL8  | 3.09% | 2.58%  |
| OSTM1   | 0.52% | 26.80% |
| OTOGL   |       |        |
| P4HA1   | 3.09% | 5.15%  |
| PAH     | 2.58% | 1.55%  |
| PALM    | 0.52% | 5.67%  |
| PAWR    | 2.58% | 2.06%  |
| PBLD    | 4.64% | 5.15%  |
| PCBD1   | 3.09% | 4.12%  |
| PCBP3   | 2.58% | 5.15%  |
| PCDH15  | 2.58% | 7.73%  |
| PCNT    | 2.58% | 5.15%  |
| PCSK4   | 1.03% | 6.70%  |
| PDSS2   | 0.52% | 27.84% |
| PDXK    | 2.58% | 5.67%  |
| PFKL    | 2.58% | 5.67%  |
| PHLDA1  | 3.09% | 2.58%  |
| PHYHIPL | 1.55% | 5.67%  |

|          |       |        |
|----------|-------|--------|
| PIAS4    | 0.00% | 4.64%  |
| PIP5K1C  | 0.00% | 4.64%  |
| PKIB     | 0.52% | 15.98% |
| PLA2G12B | 3.09% | 4.64%  |
| PLEKHJ1  | 0.52% | 6.19%  |
| PLK5P    |       |        |
| PLN      | 0.52% | 21.13% |
| PLXNC1   | 2.58% | 1.03%  |
| PMCH     | 2.58% | 1.55%  |
| POC1B    |       |        |
| POFUT2   | 2.58% | 5.15%  |
| POLR2E   | 0.52% | 6.19%  |
| POLR3B   | 2.58% | 2.06%  |
| POLRMT   | 0.52% | 5.67%  |
| POPDC3   | 0.52% | 26.80% |
| PPA1     | 3.09% | 4.12%  |
| PPAP2C   | 0.52% | 6.19%  |
| PPFIA2   | 2.06% | 2.06%  |
| PPIL6    | 0.52% | 25.77% |
| PPP1R12A | 2.06% | 2.06%  |
| PRDM1    | 0.52% | 26.80% |
| PRDM4    | 2.58% | 1.55%  |
| PREP     | 0.52% | 26.80% |
| PRF1     | 3.09% | 4.12%  |
| PRMT2    | 2.58% | 6.19%  |
| PRTN3    | 0.52% | 5.67%  |
| PSAP     | 3.09% | 3.61%  |
| PTBP1    | 0.52% | 5.67%  |
| PTPRB    | 3.61% | 1.03%  |
| PTPRK    | 1.03% | 10.31% |
| PTPRQ    |       |        |
| PTPRR    | 3.61% | 1.03%  |
| PTTG1IP  | 2.58% | 5.67%  |
| PWP1     | 2.58% | 1.55%  |
| PWP2     | 2.58% | 5.67%  |
| QRSL1    | 0.52% | 27.84% |
| RAB21    | 3.61% | 1.03%  |
| RAB36    | 0.00% | 8.76%  |
| RANBP2   | 2.06% | 6.19%  |
| RASSF9   | 2.06% | 1.55%  |
| REEP3    | 3.61% | 5.67%  |
| REEP6    | 0.52% | 6.70%  |
| REV3L    | 1.03% | 24.23% |
| REXO1    | 0.52% | 6.70%  |
| RFX4     | 2.58% | 2.06%  |
| RFX6     | 0.52% | 21.65% |
| RHOBTB1  | 1.55% | 6.19%  |
| RIC8B    | 2.58% | 2.06%  |

|          |       |        |
|----------|-------|--------|
| RNF126   | 0.52% | 5.67%  |
| RNF146   | 1.03% | 11.34% |
| RNF217   | 0.52% | 13.40% |
| ROS1     | 0.52% | 22.16% |
| RPF2     |       |        |
| RPS15    | 1.03% | 6.19%  |
| RRP1     | 2.58% | 5.67%  |
| RSPH4A   | 0.52% | 22.16% |
| RSPO3    | 1.03% | 11.86% |
| RTDR1    | 0.00% | 8.76%  |
| RTKN2    | 3.09% | 5.15%  |
| RTN4IP1  | 0.52% | 27.84% |
| RUFY2    | 4.64% | 5.15%  |
| RWDD1    | 0.52% | 22.16% |
| S100B    | 2.58% | 5.67%  |
| S1PR4    | 0.52% | 5.15%  |
| SAMD3    | 1.03% | 6.70%  |
| SAR1A    | 3.09% | 4.12%  |
| SBNO2    | 0.52% | 6.19%  |
| SCAMP4   | 0.52% | 6.70%  |
| SCML4    | 0.52% | 27.84% |
| SCYL2    | 3.09% | 1.55%  |
| SEC63    | 0.52% | 26.80% |
| SEPT10   |       |        |
| SERINC1  | 0.52% | 16.49% |
| SESN1    | 0.52% | 26.80% |
| SF3A2    | 0.52% | 6.19%  |
| SGPL1    | 3.09% | 4.12%  |
| SGTA     | 0.52% | 5.15%  |
| SH3RF3   | 2.06% | 7.22%  |
| SHC2     | 0.52% | 6.19%  |
| SIM1     | 0.52% | 27.84% |
| SIRT1    | 4.64% | 5.15%  |
| SIRT6    | 0.00% | 4.64%  |
| SLC16A10 | 1.03% | 24.23% |
| SLC16A9  | 1.55% | 6.19%  |
| SLC17A8  | 3.09% | 1.55%  |
| SLC19A1  | 2.58% | 5.15%  |
| SLC1A6   | 1.03% | 2.58%  |
| SLC22A16 | 0.52% | 24.74% |
| SLC25A16 | 4.64% | 5.15%  |
| SLC25A3  | 4.12% | 1.55%  |
| SLC29A3  | 3.09% | 4.12%  |
| SLC35F1  | 0.52% | 21.13% |
| SLC39A3  | 0.52% | 5.15%  |
| SLC41A2  | 2.06% | 1.03%  |
| SLC5A4   | 0.00% | 8.76%  |
|          |       |        |
| SLC5A8   | 3.09% | 1.55%  |
| SLC6A15  | 2.06% | 1.55%  |
| SMARCB1  | 0.52% | 9.79%  |
| SMPD2    | 0.52% | 25.77% |

|          |       |        |
|----------|-------|--------|
| SMPDL3A  | 0.52% | 15.46% |
| SNORD37  |       |        |
| SNRPD3   | 0.52% | 9.79%  |
| SNRPF    | 2.58% | 1.03%  |
| SNX3     | 0.52% | 26.80% |
| SOBP     | 0.52% | 27.84% |
| SOCS2    | 2.58% | 1.03%  |
| SPECC1L  |       |        |
| SPIC     | 2.58% | 1.03%  |
| SPOCK2   | 3.09% | 3.61%  |
| SRGN     | 4.64% | 4.64%  |
| STAB2    | 2.06% | 1.55%  |
| STK11    | 0.52% | 6.19%  |
| STOX1    | 0.00% | 0.00%  |
| SUMO3    | 2.58% | 5.67%  |
| SUPV3L1  | 4.64% | 4.64%  |
| SUSD2    | 0.52% | 10.31% |
| SYCP3    | 2.58% | 1.03%  |
| SYDE1    | 1.03% | 3.09%  |
| SYN3     | 0.00% | 9.28%  |
| SYT1     | 2.58% | 2.06%  |
| TACR2    | 3.61% | 4.12%  |
| C10orf27 | 3.09% | 4.12%  |
| TBC1D15  | 3.61% | 1.55%  |
| TBXA2R   | 0.00% | 4.64%  |
| TCF3     | 0.52% | 6.70%  |
| TCP11L2  | 2.58% | 1.03%  |
| TDG      | 2.06% | 1.03%  |
| TET1     | 4.64% | 5.15%  |
| TFAM     | 1.55% | 5.67%  |
| THAP2    | 3.61% | 1.03%  |
| THEG     | 0.52% | 6.19%  |
| THEMIS   |       |        |
| THOP1    | 0.52% | 5.15%  |
| TIMM13   | 0.52% | 6.19%  |
| TIMP3    | 0.00% | 9.28%  |
| TJP3     | 0.00% | 4.64%  |
| TLE2     | 0.52% | 5.15%  |
| TLE6     | 0.52% | 5.15%  |
| TMCC3    | 2.58% | 1.03%  |
| TMEM19   | 3.61% | 1.03%  |
| TMEM200A | 1.03% | 6.70%  |
| TMEM26   | 2.58% | 5.67%  |
| TMPO     | 4.64% | 2.58%  |
| TMPRSS9  | 0.52% | 6.19%  |
| TMTC2    | 0.00% | 0.00%  |
| TMTC3    | 2.06% | 1.55%  |
| TPD52L1  | 0.52% | 13.40% |
| TPH2     | 2.58% | 1.55%  |
| TRAF3IP2 | 1.03% | 24.23% |



|           |       |        |
|-----------|-------|--------|
| TRAPPC10  | 2.58% | 5.67%  |
| TRDN      | 0.52% | 15.98% |
| TRHDE     | 2.58% | 1.55%  |
| TRMT11    | 1.03% | 12.37% |
| TRPM2     | 2.58% | 5.67%  |
| TSPAN15   | 3.61% | 4.12%  |
| TSPAN8    | 3.61% | 1.03%  |
| TSPYL1    | 0.52% | 22.16% |
| TSPYL4    | 0.52% | 22.68% |
| TUBE1     | 1.03% | 24.23% |
| TXNRD1    | 2.06% | 1.03%  |
| TYSND1    | 3.09% | 4.12%  |
| UBE2D1    | 1.55% | 5.67%  |
| UBE2G2    | 2.58% | 5.67%  |
| UBE2N     | 2.58% | 1.03%  |
| UHRF1BP1L | 3.61% | 1.55%  |
| UNC5B     | 3.09% | 4.12%  |
| UPB1      | 0.52% | 9.79%  |
| UQCR11    |       |        |
| USP44     | 2.58% | 1.55%  |
| UTP20     | 2.58% | 1.03%  |
| VEZT      | 2.58% | 1.55%  |
| VGLL2     | 0.52% | 22.16% |
| VPREB3    | 0.52% | 9.79%  |
| VPS26A    | 4.64% | 4.64%  |
| WASF1     | 0.52% | 24.74% |
| WDR18     | 0.52% | 5.67%  |
| WISP3     | 1.03% | 24.23% |
| KIAA1274  | 3.09% | 4.12%  |
| YBEY      |       |        |
| ZBTB24    | 0.52% | 25.77% |
| ZBTB7A    | 0.00% | 4.64%  |
| ZDHHC17   | 3.09% | 2.58%  |
| ZFC3H1    | 3.61% | 1.03%  |
| ZNF280B   | 0.00% | 0.00%  |
| ZNF365    | 3.09% | 5.67%  |
| ZFR2      | 0.00% | 4.64%  |
| ZUFSP     | 0.52% | 21.13% |
| ZWINT     | 1.55% | 6.19%  |
| KIAA0748  | 2.06% | 1.55%  |

|          |       |       |
|----------|-------|-------|
| AGAP2    | 2.58% | 1.03% |
| ANKRD52  | 2.58% | 1.55% |
| APOF     | 2.58% | 1.55% |
| ARHGAP9  | 2.58% | 1.03% |
| ARHGEF25 |       |       |
| ATP5B    | 2.58% | 1.55% |
| AVIL     | 2.58% | 1.03% |
| AVPR1A   | 2.58% | 1.03% |
| B4GALNT1 | 2.58% | 1.03% |
| C12orf66 | 2.58% | 1.03% |
| BAZ2A    | 2.58% | 1.55% |
| BLOC1S1  | 2.06% | 2.06% |
| CAND1    | 4.12% | 1.55% |
| CD63     | 2.06% | 2.06% |
| CDK2     | 2.06% | 2.06% |
| CDK4     | 2.58% | 1.03% |
| CNPY2    | 2.58% | 1.55% |
| COQ10A   | 2.58% | 1.55% |
| CS       | 2.58% | 1.55% |
| CTDSP2   | 2.58% | 1.03% |
| CYP27B1  | 2.58% | 1.03% |
| C12orf56 | 2.58% | 1.03% |
| DCTN2    | 2.58% | 1.03% |
| DDIT3    | 2.58% | 1.03% |
| DGKA     | 2.06% | 2.06% |
| DNAJC14  | 2.06% | 2.06% |
| DTX3     | 2.58% | 1.03% |
| DYRK2    | 3.61% | 1.03% |
| ERBB3    | 2.06% | 2.06% |
| ESYT1    |       |       |
| FAM19A2  | 2.58% | 1.03% |
| GDF11    | 2.06% | 2.06% |
| GLI1     | 2.58% | 1.03% |
| GLS2     | 2.58% | 1.55% |
| GNS      | 3.09% | 1.03% |
| GPR182   | 2.58% | 2.58% |
| GRIP1    | 4.64% | 2.06% |
| HELB     | 4.12% | 1.55% |
| HMGA2    | 4.12% | 1.03% |
| HSD17B6  | 2.58% | 2.06% |
| IKZF4    | 2.06% | 2.06% |
| IL23A    | 2.58% | 1.55% |
| INHBC    | 3.61% | 1.03% |
| INHBE    | 2.58% | 1.03% |
| IRAK3    | 4.12% | 1.55% |
| ITGA7    | 2.06% | 2.06% |
| KIF5A    | 2.58% | 1.03% |

|          |       |       |
|----------|-------|-------|
| LEMD3    | 3.09% | 1.03% |
| LLPH     | 4.12% | 1.03% |
| LRIG3    | 2.58% | 1.03% |
| LRP1     | 2.58% | 2.06% |
| MARCH    |       |       |
| MARS     | 2.58% | 1.03% |
| MBD6     | 2.58% | 1.03% |
| METTL1   | 2.58% | 1.03% |
| METTL7B  | 2.06% | 2.06% |
| MIP      | 2.58% | 1.55% |
|          |       |       |
| MMP19    | 2.06% | 2.06% |
| MON2     | 2.58% | 1.03% |
| MSRB3    | 3.09% | 1.03% |
| MYL6     | 2.06% | 2.06% |
| MYL6B    | 2.06% | 2.06% |
| MYO1A    | 2.58% | 2.06% |
| NAB2     | 2.58% | 2.06% |
| NACA     | 2.58% | 1.55% |
| NDUFA4L2 | 2.58% | 1.55% |
| NEUROD4  | 2.06% | 1.55% |
| NXPH4    | 2.58% | 2.06% |
| OBFC2B   | 2.58% | 1.55% |
|          |       |       |
|          |       |       |
| OR6C68   | 2.06% | 1.55% |
|          |       |       |
| OR6C1    | 2.06% | 1.55% |
|          |       |       |
| OR6C3    | 2.06% | 1.55% |
| OR6C75   | 2.06% | 1.55% |
| OR6C2    | 2.06% | 1.55% |

|         |       |       |
|---------|-------|-------|
| OR10P1  | 2.06% | 2.06% |
| OR6C6   | 2.06% | 1.55% |
| OR6C65  | 2.06% | 1.55% |
| OR6C76  | 2.06% | 1.55% |
| OR6C74  | 2.06% | 1.55% |
| OR9K2   | 2.06% | 1.55% |
| OR9K1P  |       |       |
| ORMDL2  | 2.06% | 2.06% |
| OS9     | 2.58% | 1.03% |
| PA2G4   | 2.06% | 2.06% |
| PAN2    | 2.58% | 1.55% |
| PIP4K2C | 2.58% | 1.03% |
| PMEL    |       |       |
| PPM1H   | 2.58% | 1.03% |
| PRIM1   | 2.58% | 2.06% |
| PTGES3  | 2.58% | 1.55% |
| R3HDM2  | 2.58% | 1.55% |
| RAB5B   | 2.06% | 2.06% |
| RASSF3  | 3.09% | 1.03% |
| RBMS2   | 2.58% | 1.55% |
| RDH16   | 2.58% | 2.06% |
| RDH5    | 2.06% | 2.06% |

|          |       |       |
|----------|-------|-------|
| RNF41    | 2.58% | 1.55% |
| RPL41    | 2.06% | 2.06% |
| RPS26    | 2.06% | 2.06% |
| SARNP    | 2.06% | 2.06% |
| SDR9C7   | 2.58% | 2.06% |
| SHMT2    | 2.58% | 1.55% |
| SLC16A7  | 2.58% | 1.03% |
| SLC26A10 | 2.58% | 1.03% |
| SLC39A5  | 2.58% | 1.55% |
| SMARCC2  | 2.06% | 2.06% |
| SPRYD4   | 2.58% | 1.55% |
| SRGAP1   | 2.58% | 1.03% |
| STAC3    | 2.58% | 1.55% |
| STAT2    | 2.58% | 1.55% |
| STAT6    | 2.58% | 2.06% |
| SUOX     | 2.06% | 2.06% |
| TAC3     | 2.58% | 2.58% |
| TBC1D30  |       |       |
| TBK1     | 3.09% | 1.03% |
| TIMELESS | 2.58% | 1.55% |
| TMBIM4   | 4.12% | 1.03% |
| TMEM194A | 2.58% | 2.06% |
| TMEM5    | 2.58% | 1.03% |
| TSFM     | 2.58% | 1.03% |
| TSPAN31  | 2.58% | 1.03% |
| USP15    | 2.58% | 1.03% |
|          |       |       |
| WIBG     | 2.06% | 2.06% |
| WIF1     | 3.09% | 1.03% |
| XPOT     | 3.09% | 1.03% |
| XRCC6BP1 | 2.58% | 1.03% |
| ZBTB39   | 2.58% | 2.58% |
| ZC3H10   | 2.06% | 2.06% |
| MON2     | 2.58% | 1.03% |
| INHBC    | 3.61% | 1.03% |
| TAC3     | 2.58% | 2.58% |
| ASB3     | 0.52% | 7.22% |
| STC2     | 2.58% | 2.58% |
|          |       |       |
| ARMC7    | 3.09% | 1.55% |
| GGA3     | 3.09% | 1.55% |
| HN1      | 3.09% | 1.55% |
| NT5C     | 3.09% | 1.55% |
| NUP85    | 3.09% | 1.55% |
| SLC16A5  | 3.09% | 1.55% |
| SUMO2    | 3.09% | 1.55% |
| ID2      | 1.03% | 5.15% |
| RNF144A  | 1.03% | 5.15% |
| TSSC1    | 1.03% | 5.15% |

|           |       |        |
|-----------|-------|--------|
| LY86      | 1.03% | 5.67%  |
| NTRK2     | 5.15% | 2.58%  |
| AGTPBP1   | 5.67% | 3.61%  |
| EMB       | 3.61% | 6.19%  |
| HCN1      | 5.15% | 1.55%  |
|           |       |        |
| CACNA2D3  | 3.61% | 3.61%  |
| SELK      | 3.61% | 4.12%  |
| PARG      | 2.06% | 9.28%  |
| LOC10431  |       |        |
| PARG      | 2.06% | 9.28%  |
| PARG      | 2.06% | 9.28%  |
| OGDHL     | 2.58% | 8.25%  |
|           |       |        |
| SFTPD     | 4.12% | 7.73%  |
|           |       |        |
| PSMC6     | 2.58% | 4.12%  |
| C13orf15  | 0.00% | 30.93% |
| KIAA1704  | 0.52% | 34.02% |
| KIAA0564  | 0.52% | 31.96% |
| C14orf105 | 1.55% | 5.15%  |
|           |       |        |
| C14orf119 | 2.06% | 4.64%  |
|           |       |        |
| C14orf21  | 2.58% | 4.12%  |
| KIAA1967  | 1.03% | 43.81% |
| C14orf37  | 1.55% | 5.15%  |
| C8orf74   | 1.55% | 36.60% |
|           |       |        |
| C14orf93  | 2.58% | 4.64%  |
|           |       |        |
| C13orf18  | 0.00% | 35.05% |
| C13orf1   | 0.52% | 34.02% |
| C14orf101 | 2.06% | 4.64%  |
| C13orf31  | 0.52% | 32.99% |

|          |       |        |
|----------|-------|--------|
| C8orf58  | 1.03% | 43.81% |
| C13orf30 | 0.52% | 32.47% |
| ABHD4    | 4.12% | 4.64%  |
| ACIN1    | 3.09% | 4.64%  |
| ADAM2    | 4.64% | 25.26% |
| ADAM28   | 1.55% | 40.21% |
| ADAM7    | 2.06% | 38.66% |
| ADAMDEC1 | 1.55% | 40.21% |
| ADCY4    | 2.58% | 4.12%  |
| ADRA1A   | 1.55% | 35.05% |
| AKAP11   | 0.52% | 31.96% |
| ANG      | 2.06% | 4.64%  |
| AP1G2    | 2.06% | 4.64%  |
| APEX1    | 2.06% | 4.12%  |
| ARHGEF40 |       |        |
| ARL11    | 0.00% | 35.05% |
| ATP12A   | 1.03% | 10.82% |
| ATP8A2   | 1.03% | 11.34% |
| BCL2L2   | 2.06% | 4.64%  |
| BIN3     | 1.03% | 43.81% |
| BLK      | 1.55% | 36.08% |
| BMP1     | 1.03% | 42.27% |
| BNIP3L   | 1.03% | 37.11% |
| C1QTNF9  | 1.03% | 10.31% |
| CAB39L   | 0.00% | 34.54% |
| CBLN3    | 2.58% | 4.12%  |
| CCDC122  | 0.52% | 32.99% |
| CCDC25   | 1.55% | 35.05% |
| CCNB1IP1 | 2.06% | 4.12%  |
| CDADC1   | 0.00% | 34.54% |
| CDCA2    | 2.06% | 37.63% |
| CDH24    | 3.61% | 4.64%  |
| CEBPE    | 2.06% | 4.64%  |
| CENPJ    | 1.03% | 10.82% |
| CHD8     | 2.58% | 4.64%  |
| CHMP7    | 1.03% | 41.75% |
| CHRNA2   | 1.55% | 36.08% |
| CIDEB    | 2.58% | 4.12%  |
| CLU      | 1.55% | 35.57% |
| CMA1     | 2.58% | 4.12%  |
| CMTM5    | 2.06% | 4.64%  |
| COG3     | 0.52% | 34.54% |
| CPB2     | 0.00% | 35.05% |
| CPNE6    | 2.06% | 4.12%  |
| CRYL1    | 1.55% | 11.34% |
| CTSB     | 1.55% | 35.57% |
| CTSG     | 2.58% | 4.12%  |
| CYSLTR2  | 0.00% | 35.57% |

|          |       |        |
|----------|-------|--------|
| ERVFRDE1 |       |        |
| DAD1     | 5.15% | 4.64%  |
| DCAF11   |       |        |
| DEFB135  |       |        |
| DEFB136  | 1.55% | 35.57% |
| DEFB131  | 0.00% | 0.00%  |
| DEFB130  | 1.55% | 36.08% |
| DGKH     | 0.52% | 31.96% |
| DHRS1    | 2.58% | 4.12%  |
| DHRS2    | 2.06% | 4.12%  |
| DHRS4    | 2.06% | 4.12%  |
| DIAPH3   | 0.00% | 30.41% |
| DLEU2    |       |        |
| DLEU7    | 0.00% | 34.54% |
| DNAJC15  | 0.52% | 32.47% |
| DOCK5    | 1.55% | 37.63% |
| DOK2     | 1.55% | 40.72% |
| DPYSL2   | 1.03% | 36.08% |
| RNASE2   | 2.06% | 4.64%  |
|          |       |        |
| RNASE3   | 0.00% | 0.00%  |
|          |       |        |
| EBF2     | 1.55% | 37.11% |
| EBPL     | 0.52% | 35.05% |
| EDDM3B   |       |        |
| EFHA1    | 1.03% | 10.82% |
| EFS      | 2.06% | 4.64%  |
| EGR3     | 1.03% | 43.81% |
| ELF1     | 0.00% | 30.41% |
| ELP3     | 1.55% | 34.02% |
| ENOX1    | 0.52% | 32.47% |
| ENTPD4   | 1.55% | 40.72% |
| EPB49    | 1.55% | 41.24% |
| EPHX2    | 1.55% | 36.08% |
| EPST11   | 0.52% | 32.47% |
| ESCO2    | 1.55% | 35.05% |
| ESD      | 0.00% | 34.02% |
| EXOC5    | 2.06% | 4.64%  |
| EXTL3    | 2.06% | 32.99% |
| SKA3     |       |        |
| FAM123A  | 1.03% | 11.34% |
| FAM158A  | 2.06% | 4.12%  |
| FAM160B2 | 1.03% | 42.27% |
| FAM167A  | 1.55% | 36.08% |
| FBXO16   | 1.55% | 33.51% |
| FDFT1    | 1.55% | 35.57% |
| FGF17    | 1.55% | 40.72% |







|        |       |        |
|--------|-------|--------|
| MRP63  | 1.03% | 11.34% |
| MRPL52 | 2.06% | 4.64%  |
| MSRA   | 1.55% | 37.11% |
| MTMR6  | 1.03% | 11.34% |
| MTMR9  | 1.55% | 36.08% |
| MTRF1  | 0.00% | 31.96% |
| MUDENG | 2.06% | 4.64%  |
| MYH6   | 2.06% | 4.64%  |
| MYH7   | 2.06% | 4.64%  |
| N6AMT2 | 1.55% | 10.82% |
| NAA16  |       |        |
| NAA30  |       |        |
| NDRG2  | 2.06% | 4.64%  |
| NEDD8  | 2.58% | 4.64%  |
| NEFL   | 2.58% | 37.11% |
| NEFM   | 2.58% | 37.11% |
| NEIL2  | 1.55% | 35.57% |
| NFATC4 | 2.58% | 4.12%  |
| NGDN   | 2.06% | 4.64%  |
| NKX2-6 |       |        |
| NKX3-1 | 1.55% | 40.21% |
| NPM2   | 1.55% | 40.72% |
| NRL    | 2.06% | 4.12%  |
| NUDT15 | 0.00% | 32.99% |
| NUDT18 | 1.03% | 42.27% |
| NUFIP1 | 0.52% | 34.02% |
| NUPL1  | 1.03% | 11.34% |
| NYNRIN |       |        |
| OLFM4  | 0.00% | 31.44% |
| OR4E2  | 2.06% | 4.64%  |
| OR10G2 | 2.58% | 4.64%  |
| OR10G3 | 2.58% | 4.64%  |
| OR5AU1 | 2.06% | 4.64%  |
| OR6T1  | 0.52% | 4.12%  |
| OR4N5  | 2.06% | 4.12%  |
| OR4L1  | 0.00% | 0.00%  |
| OR4K15 | 0.00% | 0.00%  |
| OR4K1  | 0.00% | 0.00%  |
| OR4K5  | 0.00% | 0.00%  |
| OR4K2  | 0.00% | 0.00%  |
| OR4N4  | 0.00% | 0.00%  |
| OR4N2  | 0.00% | 0.00%  |
| OR4M1  | 0.00% | 0.00%  |
| OR4Q3  | 0.00% | 0.00%  |

|         |       |        |
|---------|-------|--------|
| OR11G2  | 2.06% | 4.12%  |
| OR11H6  | 2.06% | 4.12%  |
| OR11H4  | 2.06% | 4.12%  |
| OR6S1   | 2.06% | 4.64%  |
| OSGEP   | 2.06% | 4.12%  |
| OTX2    | 2.06% | 4.64%  |
| OXA1L   | 2.06% | 4.64%  |
| PABPN1  | 2.06% | 4.64%  |
| PARP2   | 2.06% | 4.12%  |
| PARP4   | 1.03% | 10.31% |
| PBK     | 1.55% | 35.05% |
| PCDH17  | 0.00% | 29.90% |
| PCDH20  | 0.00% | 29.38% |
| PCDH8   | 0.52% | 32.47% |
| PCK2    | 2.06% | 4.12%  |
| PDLIM2  | 1.03% | 43.81% |
| PEBP4   | 1.03% | 43.81% |
| PELI2   | 2.06% | 4.64%  |
| PHYHIP  | 1.03% | 42.27% |
| PINX1   | 1.55% | 36.60% |
| PIWIL2  | 1.03% | 42.78% |
| PNMA2   | 1.03% | 36.60% |
| PNOC    | 1.55% | 34.02% |
| PNP     |       |        |
| POLR3D  | 1.03% | 42.27% |
| PPP1R3E |       |        |
| PPP2R2A | 1.03% | 36.60% |
| PPP3CC  | 1.03% | 43.81% |
| PRMT5   | 2.58% | 4.64%  |
| PRSS55  |       |        |
| PSMB11  | 2.58% | 4.64%  |
| PSMB5   | 2.58% | 4.64%  |
| PSME1   | 2.06% | 4.12%  |
| PSME2   | 2.06% | 4.12%  |
| PSPC1   | 2.58% | 11.34% |
| PTK2B   | 1.55% | 36.08% |
| R3HCC1  |       |        |

|          |       |        |
|----------|-------|--------|
| RAB2B    | 2.58% | 4.64%  |
| RABGGTA  | 2.58% | 4.12%  |
| RB1      | 0.00% | 35.05% |
| RCBTB1   | 0.00% | 35.05% |
| RCBTB2   | 0.00% | 35.57% |
| REC8     | 2.06% | 4.12%  |
| REEP4    | 1.03% | 42.27% |
| REM2     | 2.06% | 5.15%  |
| RHOBTB2  | 1.03% | 43.30% |
| RIPK3    | 2.58% | 4.12%  |
| RNASE1   | 2.06% | 4.64%  |
| RNASE10  | 2.06% | 4.12%  |
| RNASE11  | 2.06% | 4.12%  |
| RNASE12  | 2.06% | 4.12%  |
| RNASE13  | 2.06% | 4.64%  |
| RNASE4   | 2.06% | 4.64%  |
| RNASE6   | 2.06% | 4.64%  |
| RNASE9   | 2.06% | 4.12%  |
| RNASEH2B | 0.00% | 33.51% |
| RNF17    | 1.03% | 10.82% |
| RNF31    | 2.06% | 4.12%  |
| RP1L1    | 1.55% | 36.60% |
| RPGRIP1  | 3.09% | 4.64%  |
| RPPH1    |       |        |
| SACS     | 1.03% | 10.31% |
| SALL2    | 2.58% | 4.64%  |
| SAP18    | 1.55% | 11.86% |
| SCARA3   | 1.55% | 35.05% |
| SCARA5   | 1.55% | 34.02% |
| SDR39U1  | 2.58% | 4.64%  |
| SERP2    | 0.00% | 33.51% |
| SERPINE3 | 0.00% | 32.99% |
| SETDB2   | 0.00% | 34.54% |
| SFTPC    | 1.03% | 42.27% |
| SGCG     | 1.03% | 10.31% |
| SHISA2   | 1.03% | 10.82% |
| SIAH3    | 0.00% | 34.54% |
| SLC22A17 | 2.06% | 4.64%  |
| SLC25A30 | 0.52% | 34.02% |
| SLC25A37 | 1.55% | 40.21% |
| SLC35F4  | 1.55% | 5.15%  |
| SLC39A14 | 1.03% | 42.78% |
| SLC39A2  | 2.06% | 4.64%  |
| SLC7A7   | 2.06% | 4.64%  |
| SLC7A8   | 2.06% | 4.64%  |
| SNORA31  |       |        |
| SNORD8   |       |        |
| SORBS3   | 1.03% | 43.81% |
| SOX7     | 1.55% | 36.60% |
| SPATA13  | 1.03% | 10.31% |
| SPERT    | 0.00% | 34.02% |
| STC1     | 1.55% | 40.21% |

|           |       |        |
|-----------|-------|--------|
| STMN4     | 1.55% | 36.60% |
| SUCLA2    | 0.00% | 33.51% |
| SUGT1     | 0.00% | 32.99% |
| SUPT16H   | 3.09% | 4.64%  |
| TDH       |       |        |
| TDRD3     | 0.00% | 29.90% |
| TEP1      | 2.06% | 4.12%  |
| TGM1      | 2.58% | 4.12%  |
| THTPA     | 2.06% | 4.64%  |
| TINF2     | 2.58% | 4.64%  |
| TM9SF1    | 2.06% | 4.12%  |
| TMEM55B   | 2.06% | 4.12%  |
| TNFRSF10B | 1.03% | 43.30% |
| TNFRSF19  | 1.55% | 9.79%  |
| TNFSF11   | 0.52% | 32.47% |
| TOX4      | 2.58% | 4.64%  |
| TPPP2     | 2.06% | 4.64%  |
| TPT1      | 0.52% | 34.54% |
| TRIM13    | 0.52% | 35.05% |
| TRIM35    | 1.55% | 36.60% |
| TSC22D1   | 0.00% | 33.51% |
| TSSK4     | 2.58% | 4.64%  |
| TTC5      | 2.06% | 4.12%  |
| WBP4      | 0.00% | 31.96% |
| WDFY2     | 0.00% | 33.51% |
| XKR6      | 1.55% | 36.60% |
| XPO4      | 2.06% | 11.86% |
| XPO7      | 1.55% | 40.72% |
| ZC3H13    | 0.00% | 35.05% |
| ZDHHC20   | 1.55% | 10.31% |
| ZFHX2     |       |        |
| ZNF219    | 2.58% | 5.15%  |
| ZNF395    | 1.55% | 34.02% |
| ZMYM2     | 2.06% | 10.31% |
| ZMYM5     | 2.58% | 11.86% |
| C14orf105 | 1.55% | 5.15%  |
| SLC35F4   | 1.55% | 5.15%  |
| OR4N5     | 2.06% | 4.12%  |
| RNASE3    | 0.00% | 0.00%  |
| DPYSL2    | 1.03% | 36.08% |
| OLFM4     | 0.00% | 31.44% |
| PCDH17    | 0.00% | 29.90% |
| PCDH9     | 0.00% | 28.87% |

|          |       |        |
|----------|-------|--------|
| C2orf53  | 0.52% | 4.12%  |
| C13orf34 | 0.00% | 29.90% |
| A2LD1    |       |        |
| ABCC4    | 1.55% | 18.04% |
| CLDN10   | 1.03% | 15.98% |
| CLN5     | 0.52% | 25.77% |
| CLYBL    | 1.03% | 15.98% |
| COMMD6   | 0.52% | 26.80% |
| DACH1    | 0.00% | 28.35% |
| DCT      | 0.52% | 18.04% |
| DIS3     | 0.00% | 30.41% |
| DNAJC3   | 1.03% | 15.98% |
| DOCK9    | 0.00% | 15.98% |
| DZIP1    | 1.03% | 15.98% |
| EDNRB    | 0.52% | 24.74% |
| FARP1    | 0.00% | 16.49% |
| FBXL3    | 0.52% | 25.77% |
| FGF14    | 1.03% | 15.98% |
| GPC5     | 0.00% | 19.07% |
| GPC6     | 0.52% | 19.59% |
| GPR18    | 0.00% | 15.98% |
| GPR180   | 0.52% | 18.04% |
| GPR183   | 0.00% | 15.98% |
| HS6ST3   | 0.00% | 15.98% |
| IPO5     | 0.00% | 15.98% |
| IRG1     |       |        |
| ITGBL1   | 1.03% | 15.98% |
| KCTD12   | 0.52% | 25.77% |
| KLF12    | 0.52% | 28.35% |
| KLF5     | 0.00% | 28.87% |
| KLHL1    | 0.00% | 26.80% |
| LMO7     | 0.52% | 27.32% |
| MBNL2    | 0.00% | 15.98% |
| MYCBP2   | 0.52% | 26.80% |
| MZT1     |       |        |
| NALCN    | 0.52% | 15.98% |
| NDFIP2   | 0.00% | 22.68% |
| OXGR1    | 0.00% | 15.98% |
| PCCA     | 0.52% | 16.49% |

|         |       |        |
|---------|-------|--------|
| PCDH9   | 0.00% | 28.87% |
| PIBF1   | 0.00% | 29.38% |
| POU4F1  | 0.00% | 23.71% |
| RAP2A   | 0.00% | 15.46% |
| RBM26   | 0.00% | 22.68% |
| RNF219  | 0.00% | 23.20% |
| SCEL    | 0.52% | 26.29% |
| SLAIN1  | 0.52% | 24.23% |
| SLC15A1 | 0.00% | 15.98% |
| SLITRK1 | 0.00% | 20.62% |
| SLITRK5 | 0.00% | 19.59% |
| SLITRK6 | 1.03% | 19.59% |
| SOX21   | 0.52% | 17.53% |
| SPRY2   | 0.00% | 23.20% |
| STK24   | 0.00% | 16.49% |
| TBC1D4  | 0.00% | 27.32% |
| TGDS    | 0.52% | 18.04% |
| TM9SF2  | 1.03% | 15.98% |
| TMTC4   | 0.52% | 15.98% |
| UBAC2   | 0.00% | 15.98% |
| UCHL3   | 0.52% | 26.80% |
| UGGT2   |       |        |
| ZIC2    | 0.52% | 15.98% |
| ZIC5    | 0.52% | 15.98% |
| PCDH9   | 0.00% | 28.87% |
| KLHL1   | 0.00% | 26.80% |
| DACH1   | 0.00% | 28.35% |
| KLF12   | 0.52% | 28.35% |
| C2orf53 | 0.52% | 4.12%  |
| SLITRK5 | 0.00% | 19.59% |
| GPC5    | 0.00% | 19.07% |
| PTGER4  | 6.19% | 1.03%  |
| DAB2    | 6.70% | 1.03%  |
| PTGER4  | 6.19% | 1.03%  |
| DAB2    | 6.70% | 1.03%  |
| C5orf42 | 7.73% | 2.58%  |
| C5orf42 | 7.73% | 2.58%  |
| CDH9    | 6.19% | 3.61%  |
| CDH10   | 5.67% | 2.06%  |
| CDH9    | 6.19% | 3.61%  |
| CDH10   | 5.67% | 2.06%  |
| CDH18   | 5.15% | 3.09%  |
| CENPM   | 0.52% | 8.25%  |
| CENPM   | 0.52% | 8.25%  |
| LRRK2   | 2.58% | 3.09%  |



LOC100506072

|          |       |        |
|----------|-------|--------|
| SLC38A4  | 2.58% | 3.61%  |
| AMIGO2   | 2.58% | 3.61%  |
| C12orf10 | 3.09% | 2.58%  |
| C12orf10 | 3.09% | 2.58%  |
| PDE1B    | 2.06% | 1.55%  |
| PPP1R1A  | 2.06% | 1.55%  |
| NAT15    | 5.15% | 2.06%  |
| NAT15    | 5.15% | 2.06%  |
| EIF4A2   | 4.64% | 4.64%  |
| EIF4A2   | 4.64% | 4.64%  |
| IGSF11   | 4.12% | 0.52%  |
| LSAMP    | 4.64% | 2.06%  |
| EPHA6    | 4.12% | 2.58%  |
| EPHA6    | 4.12% | 2.58%  |
| CADM2    | 3.61% | 3.09%  |
| CADM2    | 3.61% | 3.09%  |
| GBE1     | 4.12% | 5.67%  |
| ROBO1    | 3.09% | 6.19%  |
| GBE1     | 4.12% | 5.67%  |
| ROBO1    | 3.09% | 6.19%  |
| TMPRSS15 |       |        |
| NCAM2    | 2.06% | 4.64%  |
| CBR1     | 2.58% | 5.15%  |
| CBR3     | 2.58% | 5.15%  |
| FNDC1    | 1.03% | 9.28%  |
| RGMB     | 1.03% | 15.98% |
| MAN2A1   | 1.03% | 15.98% |
| LRPPRC   | 0.52% | 7.22%  |
| NRXN1    | 1.03% | 7.22%  |
| ADCYAP1  | 2.06% | 5.15%  |
| CHST9    | 2.06% | 10.82% |
| RIT2     | 1.55% | 13.92% |
| POLR2D   | 0.52% | 13.40% |
| RBM27    |       |        |
| POU4F3   | 0.52% | 5.15%  |
| CCBE1    | 2.06% | 14.43% |
| MPPE1    | 2.06% | 5.67%  |
| IMPA2    | 2.06% | 4.12%  |
| C18orf32 | 1.03% | 13.92% |
| RPL17    | 1.03% | 13.92% |
| SETBP1   | 1.03% | 13.40% |
| C11orf2  | 2.58% | 0.52%  |
| C11orf64 |       |        |

|          |       |       |
|----------|-------|-------|
| C11orf20 | 3.09% | 0.52% |
| C11orf85 | 2.58% | 0.52% |
| C11orf10 | 1.55% | 0.52% |
| C11orf48 | 2.06% | 1.55% |
| C11orf24 | 3.09% | 0.52% |
| C11orf86 |       |       |
| C11orf95 |       |       |
| C11orf66 | 1.55% | 0.52% |
| C11orf83 | 2.06% | 1.55% |
| C11orf68 | 3.09% | 0.52% |
| C11orf84 | 2.58% | 1.03% |
| ACTN3    | 3.61% | 0.52% |
| ACY3     | 3.61% | 0.52% |
| ADRBK1   | 4.12% | 0.52% |
| AHNAK    | 2.06% | 0.52% |
| AIP      | 3.61% | 0.52% |
| ALDH3B1  | 3.09% | 1.03% |
| ALDH3B2  | 3.61% | 0.52% |
| ANKRD13D | 4.12% | 0.52% |
| ARL2     | 2.58% | 0.52% |
| ASRGL1   | 2.06% | 0.52% |
| ATG2A    | 2.58% | 0.52% |
| ATL3     | 2.58% | 1.55% |
| B3GAT3   | 2.06% | 1.55% |
| B3GNT1   | 3.09% | 0.52% |
| BAD      | 3.09% | 0.52% |
| BANF1    | 3.09% | 0.52% |
| BATF2    | 2.58% | 0.52% |
| BBS1     | 3.61% | 0.52% |
| BEST1    | 2.06% | 0.52% |
| BRMS1    | 3.09% | 0.52% |
| BSCL2    | 2.06% | 1.55% |
| SLC22A9  | 2.06% | 2.06% |
| CABP2    | 3.61% | 0.52% |
| CABP4    | 3.61% | 0.52% |
| CAPN1    | 2.58% | 1.03% |
| CARNS1   |       |       |
| CATSPER1 | 3.09% | 0.52% |
| CCDC85B  | 3.09% | 0.52% |
| CCDC86   | 1.55% | 0.52% |
| CCDC87   | 3.61% | 0.52% |

|          |       |       |
|----------|-------|-------|
| CCDC88B  | 3.09% | 0.52% |
| CCS      | 3.61% | 0.52% |
| CD248    | 3.09% | 0.52% |
| CD5      | 1.55% | 0.52% |
| CD6      | 1.55% | 0.52% |
| CDC42BPG | 2.58% | 0.52% |
| CDC42EP2 | 2.58% | 1.03% |
| CDCA5    | 2.58% | 0.52% |
| CDK2AP2  | 3.61% | 0.52% |
| CFL1     | 3.09% | 0.52% |
| CHKA     | 3.09% | 1.03% |
| CHRM1    | 2.06% | 2.06% |
| CLCF1    | 3.61% | 0.52% |
| CNIH2    | 3.09% | 0.52% |
| CORO1B   | 3.61% | 0.52% |
| COX8A    | 3.09% | 1.03% |
| CPSF7    | 1.55% | 0.52% |
| CPT1A    | 3.09% | 1.03% |
| CST6     | 3.09% | 0.52% |
| CTSF     | 3.61% | 0.52% |
| CTSW     | 3.09% | 0.52% |
| CYBASC3  | 1.55% | 0.52% |
|          |       |       |
| DAGLA    | 1.55% | 0.52% |
| DAK      | 1.55% | 0.52% |
| DDB1     | 1.55% | 0.52% |
| DNAJC4   | 3.09% | 0.52% |
| DOC2GP   |       |       |
| DPF2     | 2.58% | 1.03% |
| DPP3     | 3.61% | 0.52% |
| DRAP1    | 3.09% | 0.52% |
| EEF1G    | 2.06% | 0.52% |
| EFEMP2   | 3.09% | 0.52% |
| EHBP1L1  | 2.58% | 1.03% |
| EHD1     | 2.58% | 0.52% |
| EIF1AD   | 3.09% | 0.52% |
| EML3     | 2.06% | 0.52% |
| ESRRA    | 3.09% | 0.52% |
| FADS1    | 1.55% | 0.52% |
| FADS2    | 1.55% | 0.52% |
| FADS3    | 1.55% | 0.52% |
| FAM89B   | 2.58% | 1.03% |
| FAU      | 2.58% | 0.52% |
| FEN1     | 1.55% | 0.52% |
| FERMT3   | 3.09% | 0.52% |
| FIBP     | 3.09% | 0.52% |
| FKBP2    | 3.09% | 0.52% |
| FLRT1    | 3.09% | 0.52% |
| FOSL1    | 3.09% | 0.52% |
| FRMD8    | 2.58% | 1.03% |
| FTH1     | 2.06% | 0.52% |

|              |       |       |
|--------------|-------|-------|
| GAL          | 3.09% | 1.03% |
| GAL3ST3      | 3.09% | 0.52% |
| GANAB        | 2.06% | 1.55% |
| DKFZp761E198 | 3.09% | 0.52% |
| C11orf9      | 1.55% | 0.52% |
| GNG3         | 2.06% | 1.55% |
| GPHA2        | 2.58% | 0.52% |
| GPR137       | 3.09% | 0.52% |
| GPR152       | 3.61% | 0.52% |
| GPR44        | 1.55% | 0.52% |
| GSTP1        | 3.61% | 0.52% |
| HNRNPUL2     | 2.06% | 2.06% |
| HRASLS5      | 2.06% | 2.06% |
| IGHMBP2      | 3.09% | 1.03% |
| INCENP       | 2.06% | 0.52% |
| INTS5        | 2.06% | 1.55% |
| KAT5         | 3.09% | 0.52% |
| KCNK4        | 3.09% | 0.52% |
| KCNK7        | 2.58% | 1.03% |
| KDM2A        | 4.12% | 0.52% |
| KLC2         | 3.09% | 0.52% |
| LGALS12      | 2.06% | 2.06% |
| LRFN4        | 3.61% | 0.52% |
| LRP5         | 3.09% | 1.03% |
| LRRC10B      |       |       |
| LRRN4CL      | 2.06% | 1.55% |
| LTBP3        | 2.58% | 1.03% |
| MACROD1      | 3.09% | 1.03% |
| MALAT1       |       |       |
| MAP3K11      | 2.58% | 1.03% |
| MAP4K2       | 2.58% | 1.03% |
| MARK2        | 2.58% | 1.03% |
| MEN1         | 2.58% | 1.03% |
| MRPL11       | 3.09% | 0.52% |
| MRPL21       | 3.09% | 1.03% |
| MRPL49       | 2.58% | 0.52% |
| MS4A10       | 1.55% | 0.52% |
| MS4A13       | 1.55% | 0.52% |
| MS4A15       | 1.55% | 0.52% |
| MS4A8B       | 1.55% | 0.52% |
| MTA2         | 2.06% | 0.52% |
| MTL5         | 3.09% | 1.03% |
| MUS81        | 3.09% | 0.52% |
| NAA40        |       |       |
| NAALADL1     | 2.58% | 0.52% |
| NDUFS8       | 3.09% | 1.03% |
| NDUFV1       | 3.61% | 0.52% |

|          |       |       |
|----------|-------|-------|
| NEAT1    |       |       |
| NPAS4    | 3.09% | 0.52% |
| NRXN2    | 3.09% | 0.52% |
| NUDT22   | 3.09% | 0.52% |
| NUDT8    | 3.61% | 0.52% |
| NXF1     | 2.06% | 1.55% |
| OTUB1    | 3.09% | 1.03% |
| OVOL1    | 3.09% | 0.52% |
| PACS1    | 3.09% | 0.52% |
| PCNXL3   | 2.58% | 1.03% |
| PC       | 4.64% | 0.52% |
| PELI3    | 3.61% | 0.52% |
| PITPNM1  | 3.61% | 0.52% |
| PLA2G16  | 2.58% | 2.06% |
| PLCB3    | 3.09% | 0.52% |
| POLA2    | 2.58% | 1.03% |
| POLD4    | 3.61% | 0.52% |
| POLR2G   | 2.06% | 2.58% |
| PPP1CA   | 3.61% | 0.52% |
| PPP1R14B | 3.09% | 0.52% |
| PPP2R5B  | 2.58% | 0.52% |
| PPP6R3   |       |       |
| PRDX5    | 3.09% | 0.52% |
| PRPF19   | 1.55% | 0.52% |
| PTPRCAP  | 3.61% | 0.52% |
| PYGM     | 3.09% | 0.52% |
| RAB1B    | 3.09% | 0.52% |
| RAB3IL1  | 2.06% | 0.52% |
| RAD9A    | 3.61% | 0.52% |
| RASGRP2  | 3.09% | 0.52% |
| RBM14    | 3.61% | 0.52% |
| RBM4     | 3.61% | 0.52% |
| RBM4B    | 3.61% | 0.52% |
| RCE1     | 3.61% | 0.52% |
| RCOR2    | 2.58% | 1.03% |
| RELA     | 3.09% | 0.52% |
| RHOD     | 4.12% | 0.52% |
| RIN1     | 3.09% | 0.52% |
| RNASEH2C | 3.09% | 0.52% |
| ROM1     | 2.06% | 0.52% |
| RPS6KA4  | 3.09% | 0.52% |
| RPS6KB2  | 3.61% | 0.52% |
| RTN3     | 2.58% | 1.03% |
| SAC3D1   | 2.58% | 0.52% |
| SART1    | 3.09% | 0.52% |
| SCGB1A1  | 2.06% | 0.52% |
| SCYL1    | 2.58% | 1.03% |
| SDHAF2   |       |       |
| SF1      | 3.09% | 0.52% |
| SF3B2    | 3.09% | 0.52% |
| SIPA1    | 2.58% | 1.03% |

|          |       |       |
|----------|-------|-------|
| SLC15A3  | 1.55% | 0.52% |
| SLC22A12 | 3.09% | 0.52% |
| SLC22A25 | 2.06% | 2.06% |
| SLC22A6  | 2.06% | 2.06% |
| SLC22A8  | 2.06% | 2.06% |
| SLC25A45 | 2.58% | 1.03% |
| SLC29A2  | 3.09% | 0.52% |
| SLC3A2   | 2.06% | 2.06% |
| SNORD22  |       |       |
| SNX15    | 2.58% | 0.52% |
| SNX32    | 3.09% | 0.52% |
| SPTBN2   | 3.61% | 0.52% |
| SSH3     | 3.61% | 0.52% |
| SSSCA1   | 2.58% | 1.03% |
| STIP1    | 3.09% | 0.52% |
| STX5     | 2.06% | 1.55% |
| SUV420H1 | 3.09% | 1.03% |
| SYT12    | 4.12% | 0.52% |
| SYT7     | 1.55% | 0.52% |
| SYVN1    | 2.58% | 0.52% |
| TAF6L    | 2.06% | 2.58% |
| TBC1D10C | 3.61% | 0.52% |
| TBX10    | 3.61% | 0.52% |
| TCIRG1   | 3.09% | 1.03% |
| TIGD3    | 2.58% | 1.03% |
| TM7SF2   | 2.58% | 0.52% |
| TMEM109  | 1.55% | 0.52% |
| TMEM132A | 1.55% | 0.52% |
| TMEM134  | 3.61% | 0.52% |
| TMEM138  | 1.55% | 0.52% |
| TMEM151A | 3.09% | 0.52% |
| TMEM179B | 2.06% | 1.55% |
| TMEM216  | 1.55% | 0.52% |
| TMEM223  | 2.06% | 1.55% |
| TRMT112  |       |       |
| TRPT1    | 3.09% | 0.52% |
| TTC9C    | 2.06% | 2.06% |
| TUT1     | 2.06% | 0.52% |
| UBXN1    | 2.06% | 1.55% |
| UNC93B1  | 3.09% | 1.03% |
| VEGFB    | 3.09% | 0.52% |
| VPS37C   | 1.55% | 0.52% |
| VWCE     | 1.55% | 0.52% |
| WDR74    | 2.06% | 1.55% |
| YIF1A    | 3.09% | 0.52% |
| ZBTB3    | 2.06% | 2.06% |
| ZDHHC24  | 3.61% | 0.52% |
| ZFPL1    | 2.58% | 0.52% |
| ZNHIT2   | 2.58% | 0.52% |
| ZP1      | 1.55% | 0.52% |

|         |       |       |
|---------|-------|-------|
| CEP78   | 4.12% | 3.09% |
| CNTF    | 1.55% | 0.52% |
| DTX4    | 1.55% | 0.52% |
| FAM111A | 1.55% | 0.52% |
| GIF     | 1.55% | 0.52% |
| GLYAT   | 1.55% | 0.52% |
| LPXN    | 1.55% | 0.52% |
| MPEG1   | 1.55% | 0.52% |
| MRPL16  | 1.55% | 0.52% |
| MS4A1   | 1.55% | 0.52% |
| MS4A2   | 1.55% | 0.52% |
| MS4A3   | 1.55% | 0.52% |
| MS4A5   | 1.55% | 0.52% |
| MS4A6A  | 1.55% | 0.52% |
| MS4A7   | 1.55% | 0.52% |
| OR10V1  | 1.55% | 0.52% |
| OR4D11  | 1.55% | 0.52% |
| OR4D10  | 1.55% | 0.52% |
| OR4D9   | 1.55% | 0.52% |
| OR4D6   | 1.55% | 0.52% |
| OR5AN1  | 1.55% | 0.52% |
| OR5B21  | 1.55% | 1.03% |
| OR5B12  | 2.06% | 1.03% |
| OR5B2   | 2.06% | 1.03% |

|            |       |       |
|------------|-------|-------|
| OR5B17     | 1.55% | 1.03% |
| OR5B3      | 2.06% | 1.03% |
| OR10W1     | 1.55% | 1.03% |
| OR10Q1     | 1.55% | 1.03% |
| OR1S1      | 1.55% | 1.03% |
| OR9Q2      | 1.55% | 1.03% |
| OR9Q1      | 1.55% | 1.03% |
| OR9I1      | 1.55% | 1.03% |
| OR5A1      | 1.55% | 0.52% |
| OOSP1      |       |       |
| OSBP       | 1.55% | 0.52% |
| PATL1      | 1.55% | 0.52% |
| PLAC1L     | 1.55% | 0.52% |
| PSAT1      | 4.12% | 3.09% |
| STX3       | 1.55% | 0.52% |
| TLE4       | 4.12% | 3.61% |
| ZFP91-CNTF |       |       |
| ZFP91      | 1.55% | 0.52% |
| C9orf85    | 4.64% | 2.58% |
| C9orf135   | 4.12% | 2.58% |
| C9orf41    | 3.61% | 2.58% |
| ALDH1A1    | 4.12% | 2.58% |
| ANXA1      | 4.12% | 2.58% |
| APBA1      | 4.12% | 2.58% |



|           |       |        |
|-----------|-------|--------|
| C9orf95   | 3.61% | 2.58%  |
| CBWD1     | 0.00% | 0.00%  |
| C9orf40   | 3.61% | 2.58%  |
| DMRT1     | 3.61% | 3.61%  |
| DMRT2     | 3.61% | 3.61%  |
| DMRT3     | 3.61% | 3.61%  |
| DOCK8     | 0.00% | 0.00%  |
| C9orf71   | 4.12% | 2.58%  |
| FAM108B1  | 4.64% | 2.58%  |
| FAM122A   | 4.12% | 2.58%  |
| FAM189A2  |       |        |
| FOXD4     | 0.00% | 0.00%  |
| FXN       | 4.12% | 2.58%  |
| GDA       | 4.64% | 2.58%  |
| KANK1     | 0.00% | 0.00%  |
| KLF9      | 4.12% | 2.58%  |
| MAMDC2    | 4.12% | 2.58%  |
| OSTF1     | 3.61% | 2.58%  |
| PGM5      | 4.12% | 4.12%  |
| PIP5K1B   | 4.12% | 2.58%  |
| PTAR1     | 4.12% | 2.58%  |
| RORB      | 3.61% | 2.58%  |
| SMC5      | 4.12% | 2.58%  |
| TJP2      | 4.12% | 2.58%  |
| TMC1      | 4.12% | 3.09%  |
| TMEM2     | 4.64% | 3.09%  |
| TRPM3     | 4.12% | 2.58%  |
| TRPM6     | 3.61% | 2.58%  |
| ZFAND5    | 4.64% | 2.58%  |
| KIAA0020  | 3.61% | 4.64%  |
| KCNV2     | 3.61% | 4.64%  |
| SMARCA2   | 3.61% | 5.15%  |
| VLDLR     | 3.61% | 4.64%  |
| CEP55     | 1.55% | 11.86% |
| TMEM20    | 2.06% | 11.86% |
| PLCE1     | 2.06% | 11.34% |
| SUFU      | 1.55% | 9.79%  |
| C10orf81  | 1.55% | 9.28%  |
| C10orf118 | 1.55% | 9.28%  |
| ABLIM1    | 1.55% | 9.28%  |
| ACSL5     | 1.55% | 9.28%  |
| ADRB1     | 1.55% | 9.28%  |
| AFAP1L2   | 1.55% | 9.28%  |
| CASP7     | 1.55% | 9.28%  |
| DCLRE1A   | 1.55% | 9.28%  |

|         |       |        |
|---------|-------|--------|
| GPAM    | 1.03% | 10.31% |
| GUCY2GP |       |        |
| HABP2   | 1.55% | 9.28%  |
| NHLRC2  | 1.55% | 9.28%  |
| NRAP    | 1.55% | 9.28%  |
| TCF7L2  | 1.55% | 9.28%  |
| TDRD1   | 1.55% | 9.28%  |
| TECTB   | 1.55% | 9.28%  |
| VTI1A   | 1.55% | 9.28%  |
| VWA2    | 1.55% | 9.28%  |
| ZDHHC6  | 1.55% | 9.28%  |
| VTI1A   | 1.55% | 9.28%  |
| NAP1L3  |       |        |

DDX3Y

KDM5D  
TSPY1

UTY

DDX3Y  
USP9Y  
DDX3Y  
USP9Y  
USP9Y  
USP9Y  
USP9Y  
USP9Y

SRY

RBM1A1
